# Supplementary material for: β-Ionone enhances the inhibitory effects of 5-fluorouracil on the proliferation of gastric adenocarcinoma cells by the GSK-3β signaling pathway
Source: PubMed Central journal article supplement (PMC11379261; doi:10.1371/journal.pone.0309014), 2024-09-06

Figure 4E HE staining of SGC-7901 cell xenografts

Ctrl

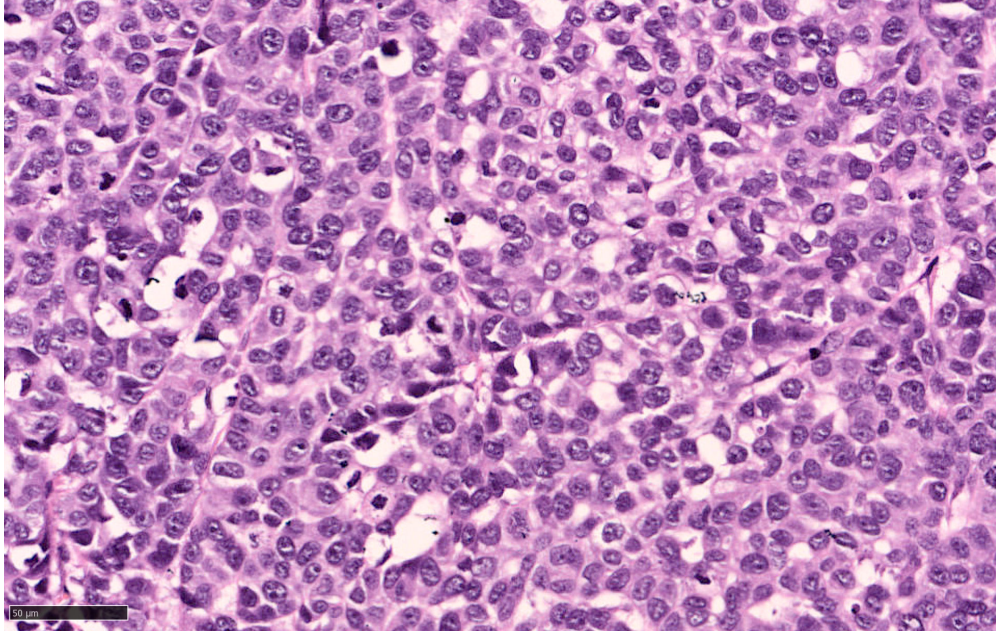

BI

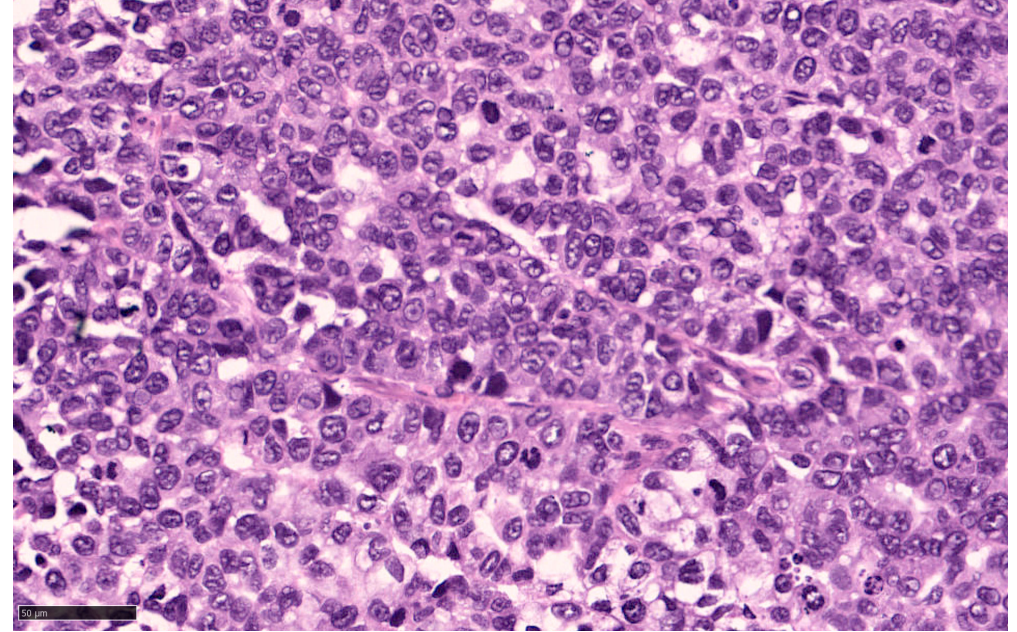

5-FU

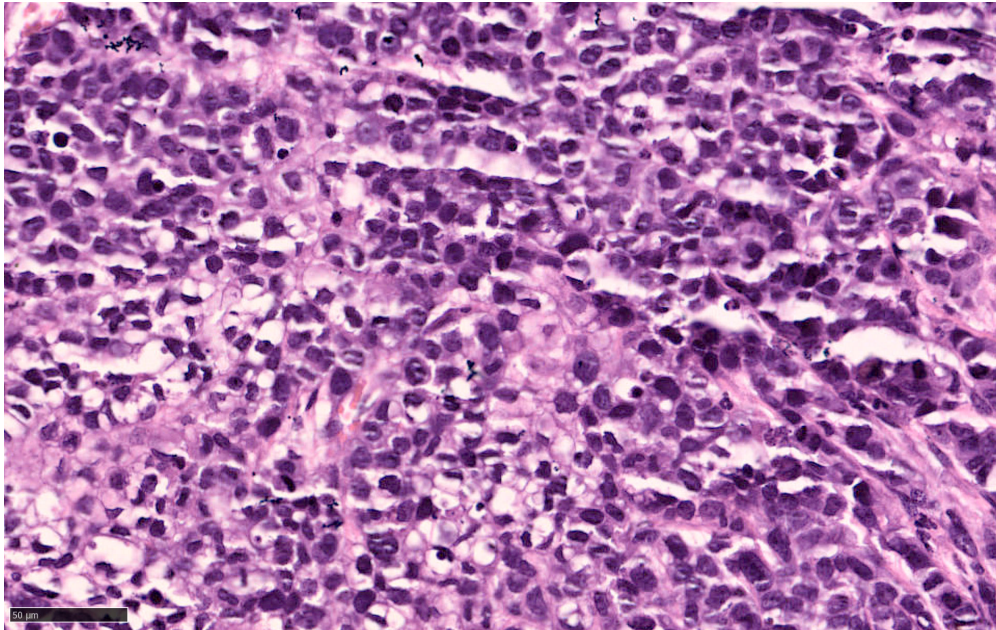

BI+5-FU

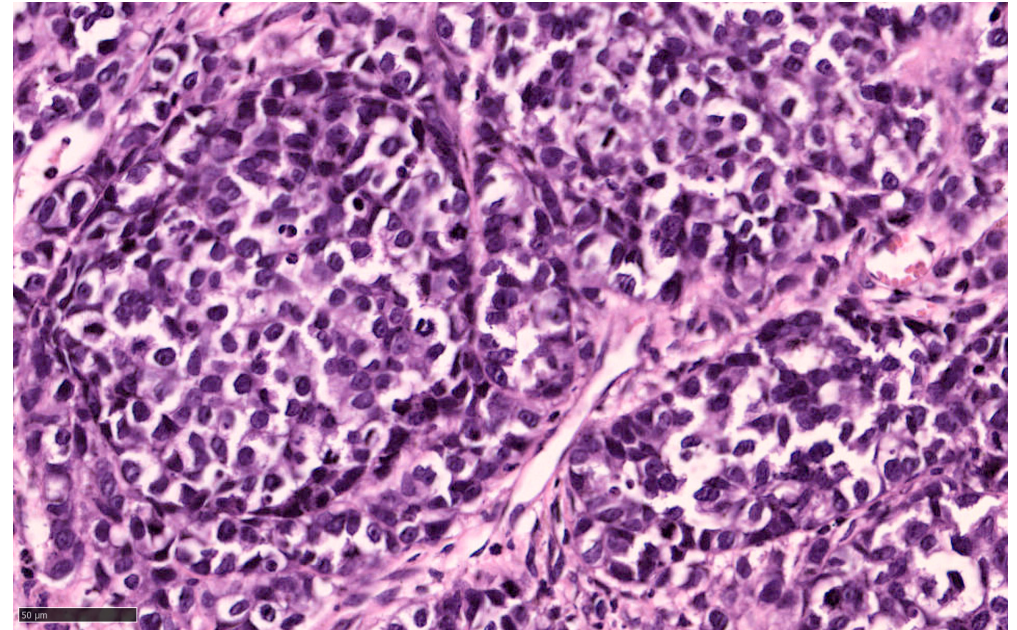

Figure 5A The expression of PCNA was detected in xenografts by IHC

Ctrl

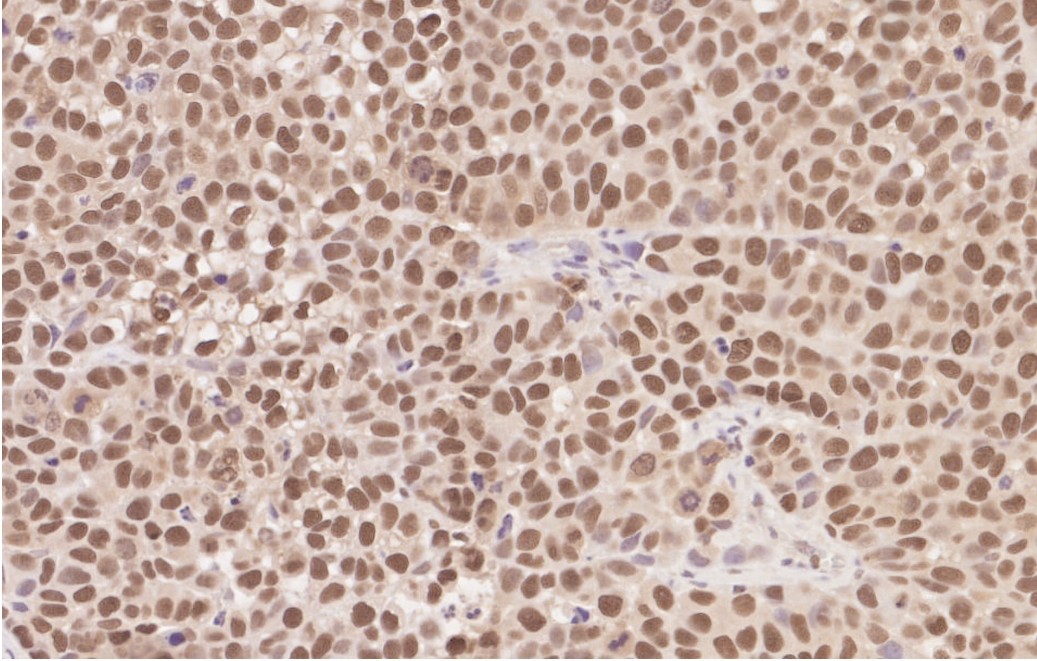

BI

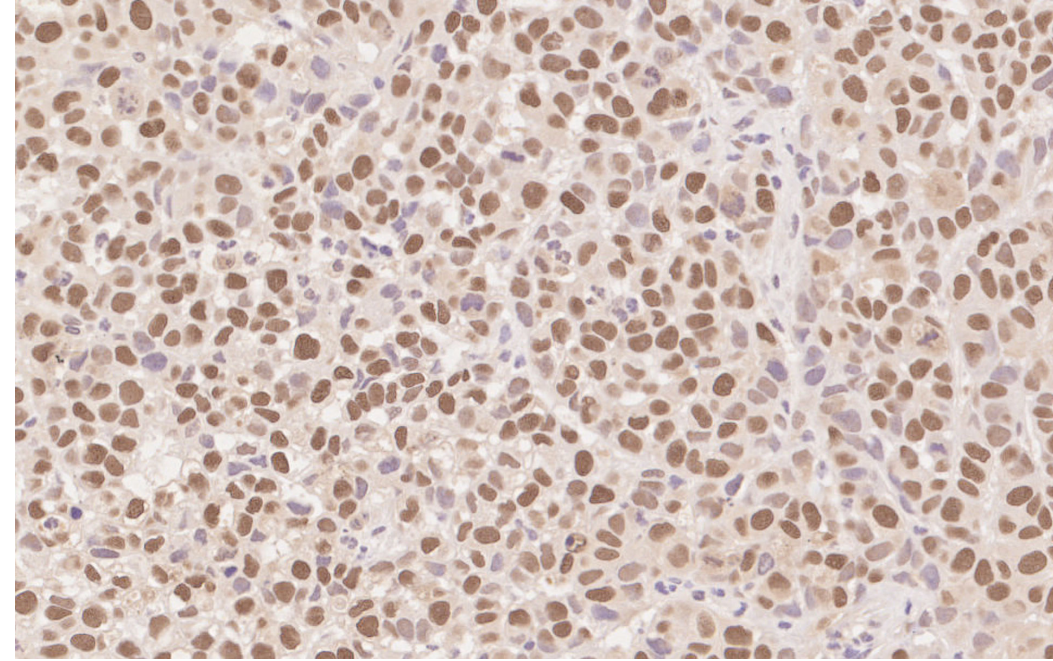

5-FU

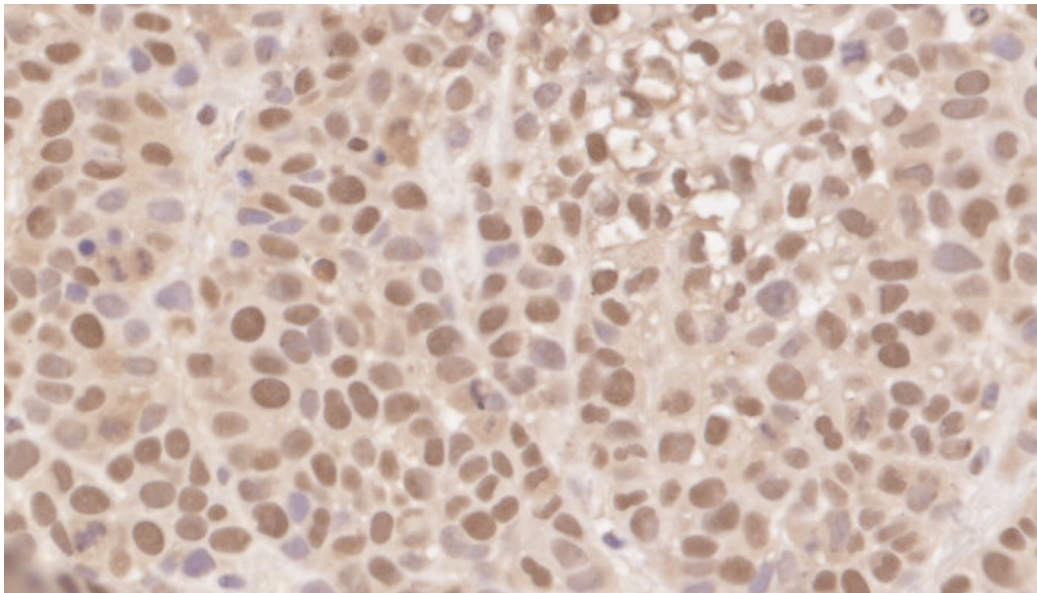

BI+5-FU

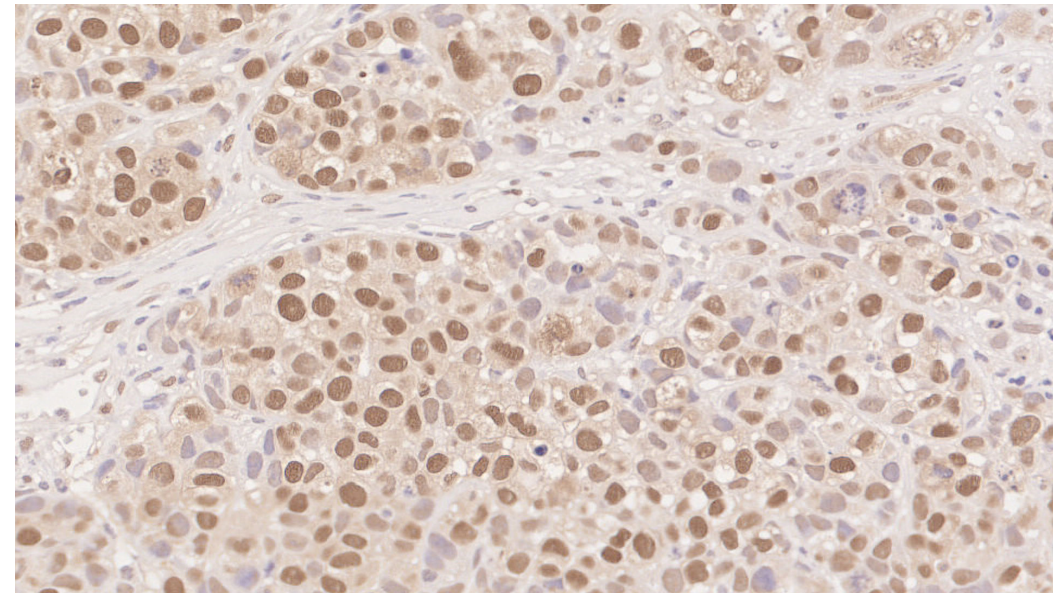

PCNA

| 0     | BI    | 5-FU  | BI+5-FU |  |
|-------|-------|-------|---------|--|
|       |       |       |         |  |
| 302.0 | 215.0 | 201.0 | 124.0   |  |
| 393.0 | 219.0 | 211.0 | 119.0   |  |
| 415.6 | 250.0 | 224.2 | 104.0   |  |
| 410.0 | 230.0 | 217.0 | 128.0   |  |
|       |       |       |         |  |

Figure 5D The number of apoptotic cells detected in xenografts by TUNEL

Ctrl

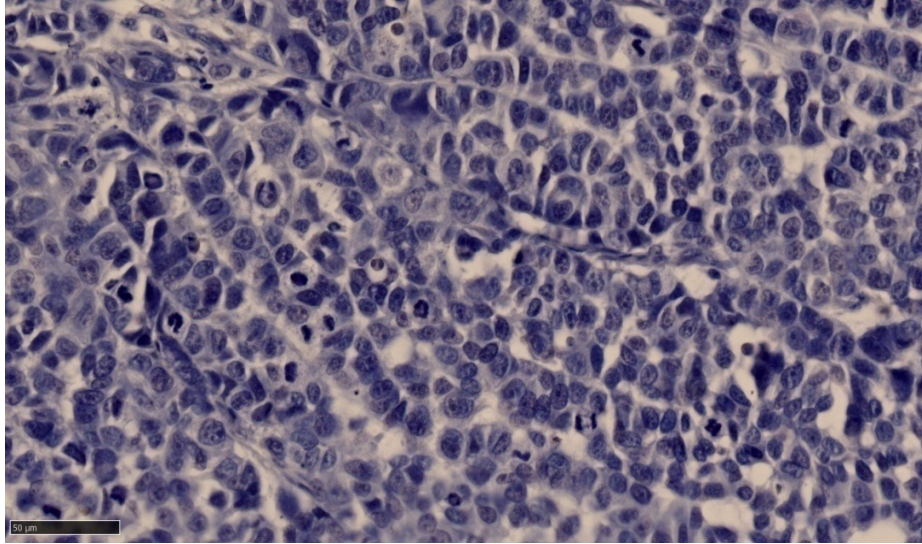

BI

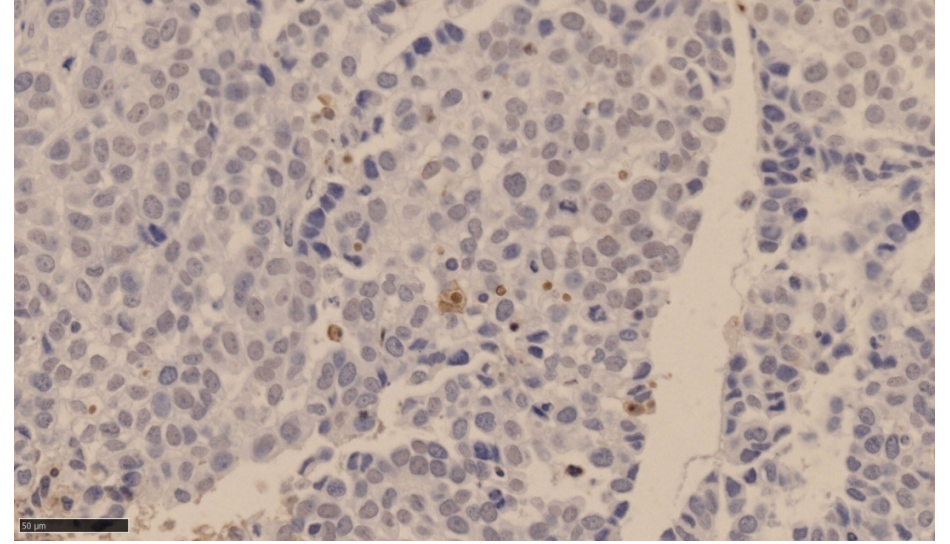

5-FU

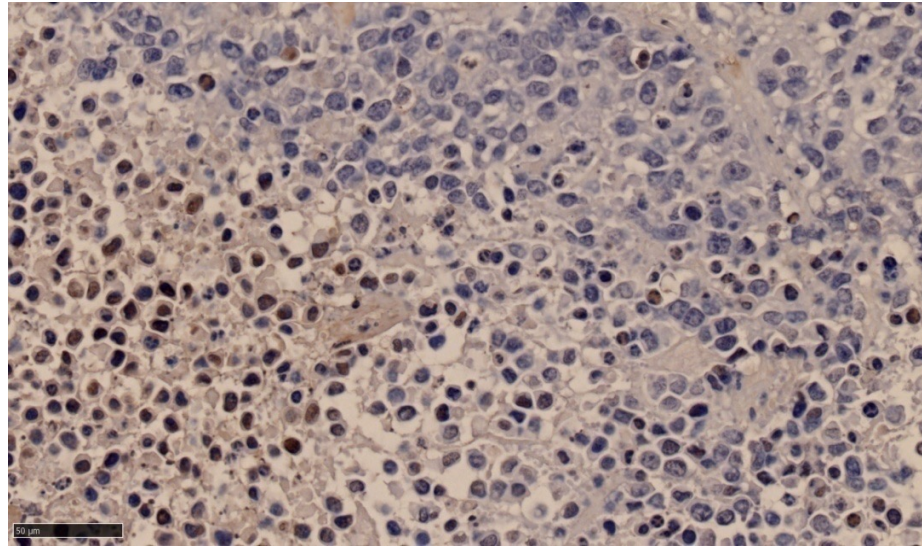

BI+5-FU

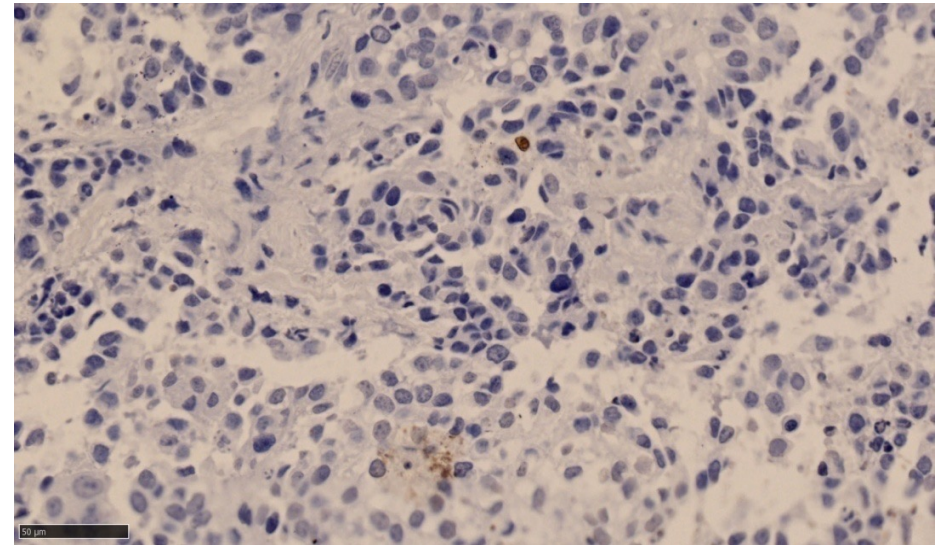

| TUNEL 联合                | 右上  | 右下  | 中-3 | 左上  | 左下  | 左上2 | 左下2 | 中2 |          |
|-------------------------|-----|-----|-----|-----|-----|-----|-----|----|----------|
| 2020-9-10 18.12.9上      | 31  | 32  | 35  | 67  | 31  |     |     |    | 39.2     |
| 2020-9-10 18.12.9下      | 22  | 47  | 24  | 23  | 21  |     |     |    | 27.4     |
| 2021-1-12 18.12.9 联合 1左 | 154 | 160 | 212 | 172 | 148 | 166 |     |    | 168.6667 |
| 2021-1-12 18.12.9 联合 2左 | 139 | 173 | 183 | 156 | 91  | 151 |     |    | 148.8333 |
| 2021-1-12 18.12.9 联合 2右 | 158 | 217 | 140 | 168 | 176 |     | 154 |    | 168.8333 |
| 2020-9-10 18.12.9 联合上   |     |     |     |     |     |     |     |    |          |
|                         |     |     |     |     |     |     |     |    |          |
|                         |     |     |     |     |     |     |     |    |          |
| 2021-1-12 18.12.9 对照 左上 | 4   | 2   | 2   | 0   | 0   | 0   |     |    | 1.333333 |
| 2021-1-12 18.12.9 对照 右上 | 1   | 0   | 1   | 0   | 3   |     | 2   |    | 1.166667 |
| 2021-1-12 18.12.9 对照 左下 | 1   | 2   | 1   | 1   | 1   |     | 0   |    | 1        |
| 19-10-12 18.12.9对照 上    | 2   | 6   | 1   | 3   | 2   |     |     |    | 2.8      |
| 19-10-12 18.12.9对照 上-右  | 9   | 7   | 4   | 5   | 8   |     |     | 4  |          |
| 19-10-12 18.12.9对照 下    | 1   | 1   | 3   | 2   | 2   |     |     | 4  | 2.166667 |
|                         |     |     |     |     |     |     |     |    |          |
|                         |     |     |     |     |     |     |     |    |          |
| 21-1-12 18.12.9 BI 上    | 7   | 6   | 7   | 8   | 15  | 6   |     |    | 8.166667 |
| 21-1-12 18.12.9 BI 下    | 16  | 6   | 13  | 8   | 7   |     |     |    | 10       |
| 20-10-12 上              | 14  | 10  | 8   | 9   | 9   | 7   |     |    | 9.5      |
| 20-10-12 下              | 10  | 22  | 14  | 9   | 9   | 12  |     |    | 12.66667 |
| 19-11-05 BI组 上          | 12  | 11  | 22  | 8   | 11  |     |     |    | 12.8     |
| 19-11-05 BI组 下          | 13  | 12  | 15  | 11  | 16  | 10  | 13  | 10 | 12.5     |
|                         |     |     |     |     |     |     |     |    |          |
|                         |     |     |     |     |     |     |     |    |          |
| 20-9-10 5-FU 18.12.9上   | 9   | 9   | 14  | 12  | 8   |     |     |    | 10.4     |
| 20-9-10 5-FU 18.12.9下   | 15  | 20  | 11  | 15  | 13  |     |     |    | 14.8     |
| 21-1-12 中               | 8   | 17  | 13  | 18  | 19  |     |     |    | 15       |
| 21-1-12 下               | 10  | 10  | 5   | 23  | 65  |     |     |    | 22.6     |

Figure 5E The expression of Bcl-2 proteins was detected in xenografts by IHC

Ctrl

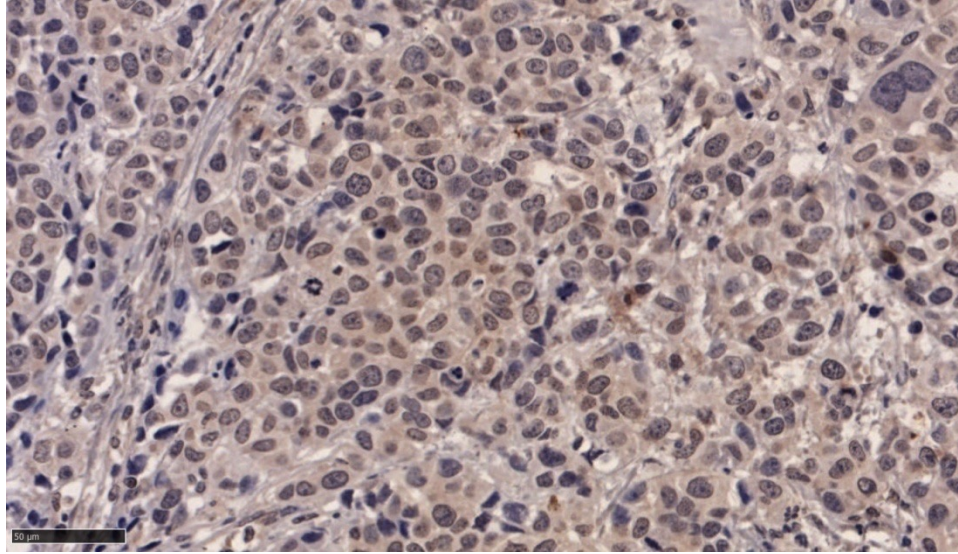

BI

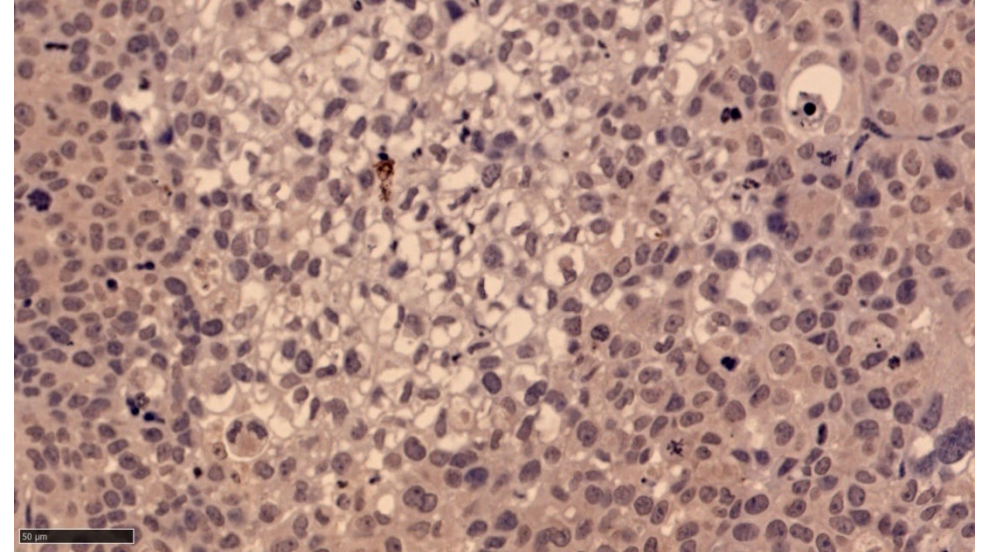

5-FU

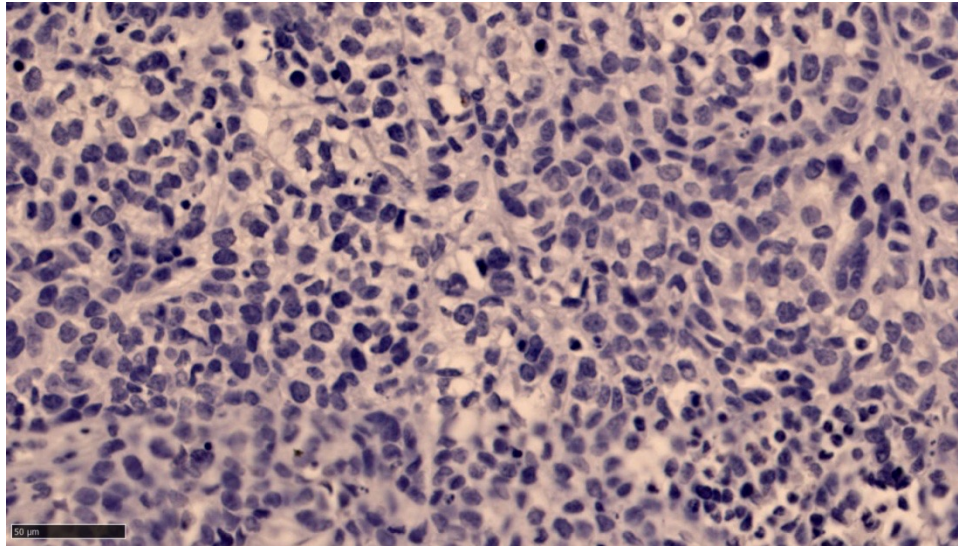

BI+5-FU

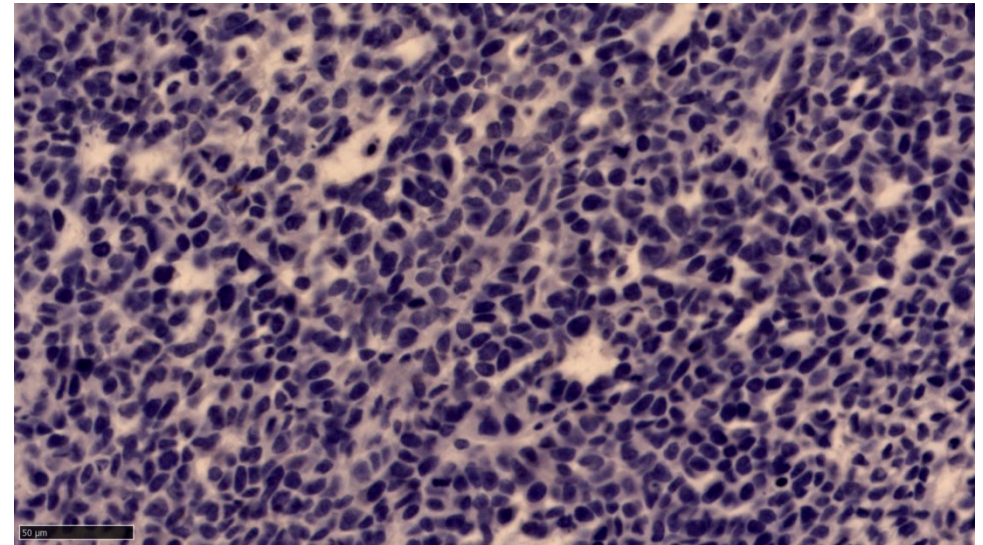

| BCL-2   |          |               | 右上  | 右下  | 中   | 左上  | 左下  | 中2  |          |
|---------|----------|---------------|-----|-----|-----|-----|-----|-----|----------|
| 21.4.17 | 18.10.27 | 对照 BCL-2上     | 80  | 166 | 129 | 104 | 124 | 160 | 127.1667 |
| 21.4.17 | 18.10.27 | 对照 BCL-2右下    | 141 | 123 | 185 | 208 | 151 | 200 | 168      |
| 21.4.17 | 18.10.27 | 对照 BCL-2左下    | 111 | 115 | 155 | 140 | 93  | 120 | 122.3333 |
|         |          |               |     |     |     |     |     |     |          |
|         |          |               |     |     |     |     |     |     |          |
|         |          |               |     |     |     |     |     |     |          |
|         |          |               |     |     |     |     |     |     |          |
| 21.4.17 | 18.10.27 | BI BCL-2上     | 39  | 70  | 78  | 85  | 54  |     | 65.2     |
| 21.4.17 | 18.10.27 | BI BCL-2右下    | 29  | 40  | 28  | 63  | 66  |     | 45.2     |
| 21.4.17 | 18.10.27 | BI BCL-2左下    | 82  | 90  | 140 | 41  | 64  | 62  | 79.83333 |
|         |          |               |     |     |     |     |     |     |          |
|         |          |               |     |     |     |     |     |     |          |
|         |          |               |     |     |     |     |     |     |          |
|         |          |               |     |     |     |     |     |     |          |
| 21.4.19 | 18.12.9  | bcl-2 5-FU 左  | 8   | 11  | 30  | 21  | 8   |     | 15.6     |
| 21.4.19 | 18.12.9  | bcl-2 5-FU 左下 | 22  | 14  | 10  | 24  | 20  | 12  | 17       |
| 21.6.30 | 18.12.9  | bcl-2 5-FU 右  | 34  | 17  | 21  | 33  | 38  |     | 28.6     |
| 21.6.30 | 18.12.9  | bcl-2 5-FU 左  | 47  | 16  | 31  | 58  | 40  |     | 38.4     |
|         |          |               |     |     |     |     |     |     |          |
|         |          |               |     |     |     |     |     |     |          |
|         |          |               |     |     |     |     |     |     |          |
|         |          |               |     |     |     |     |     |     |          |
| 21.4.17 | 18.10.27 | 联合 BCL-2上     | 0   | 0   | 1   | 0   | 0   |     | 0.2      |
| 21.4.17 | 18.10.27 | 联合 BCL-2右下    | 1   | 1   | 0   | 0   | 0   |     | 0.4      |
| 21.4.17 | 18.10.27 | 联合 BCL-2左下    | 0   | 0   | 1   | 0   | 0   |     | 0.2      |
| 21.6.24 | 18.12.9  | 联合 Bcl-2左     | 0   | 3   | 1   | 0   | 2   |     | 1.2      |

Figure 5F The expression of Bax proteins was detected in xenografts by IHC

Ctrl

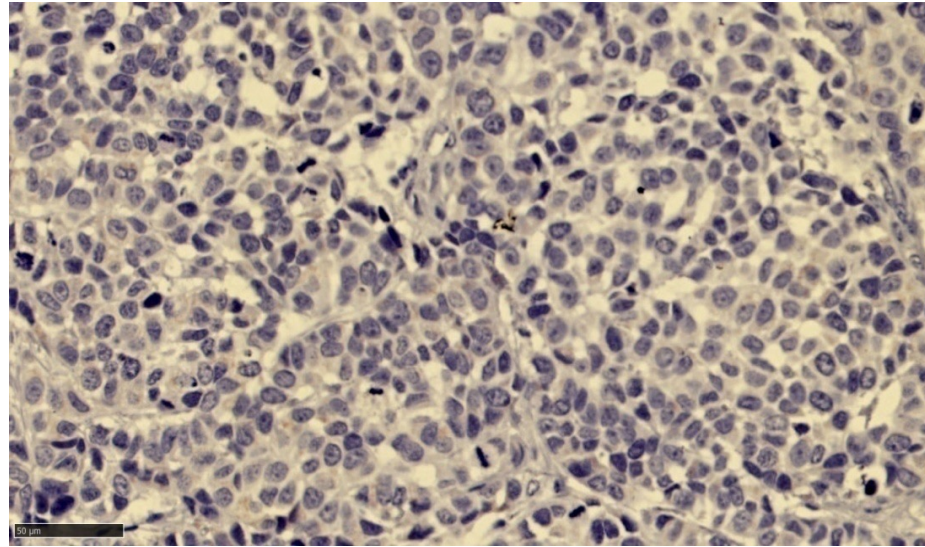

BI

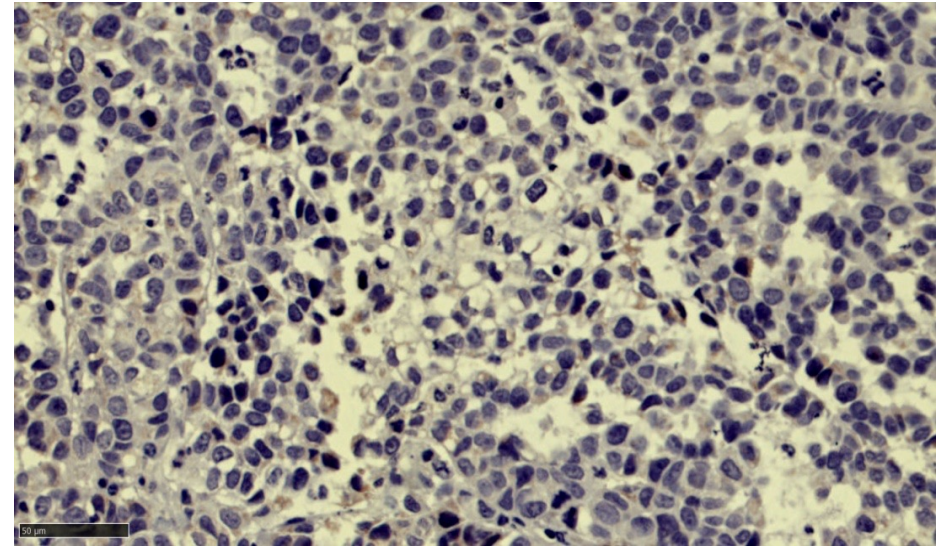

5-FU

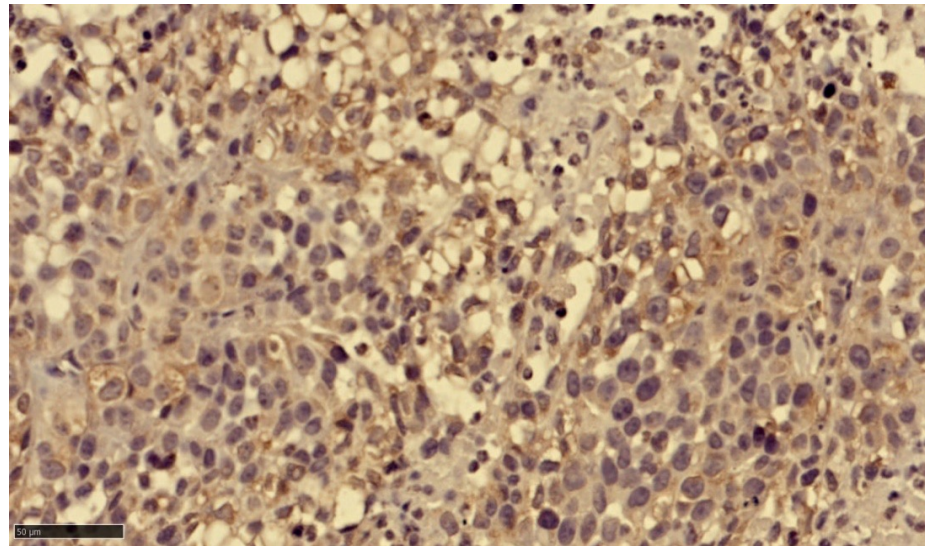

BI+5-FU

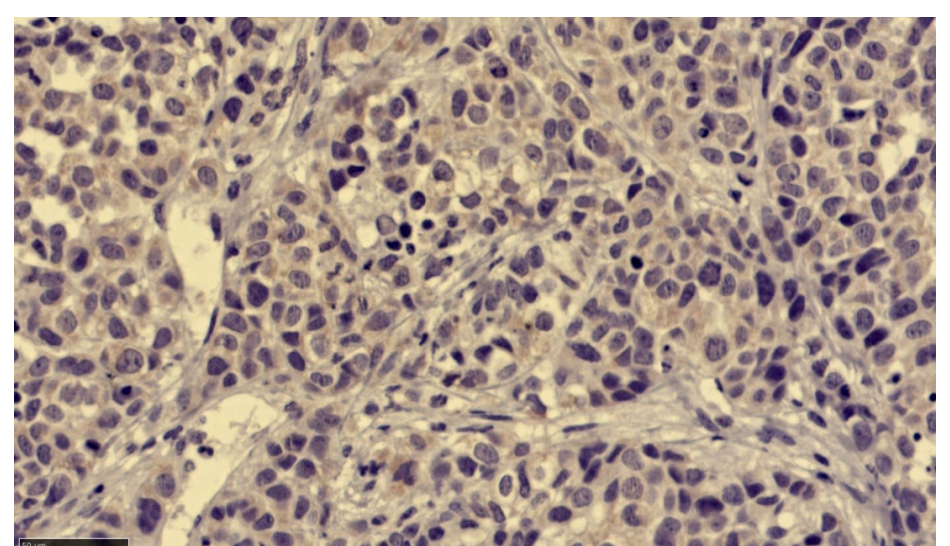





Figure 5G The expression of Cleaved caspase-3 proteins was detected in xenografts by IHC

Ctrl

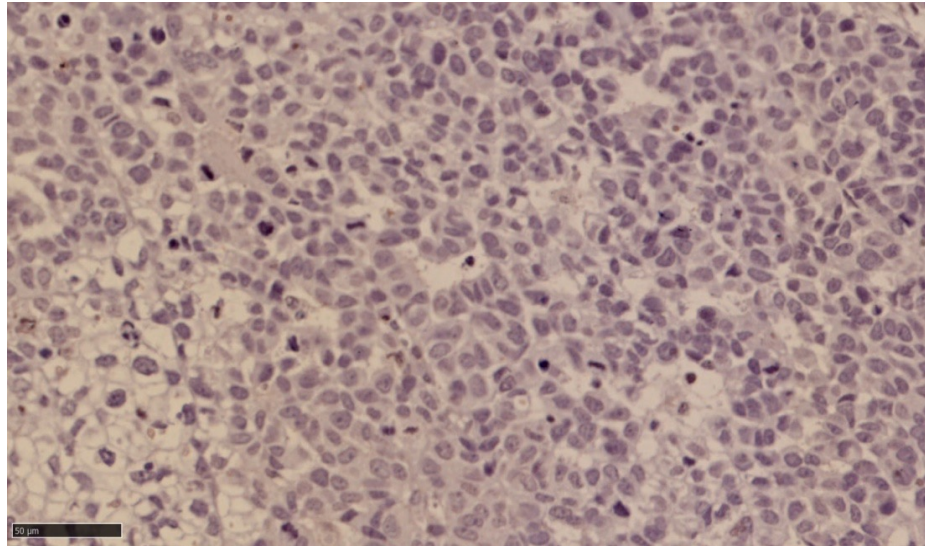

BI

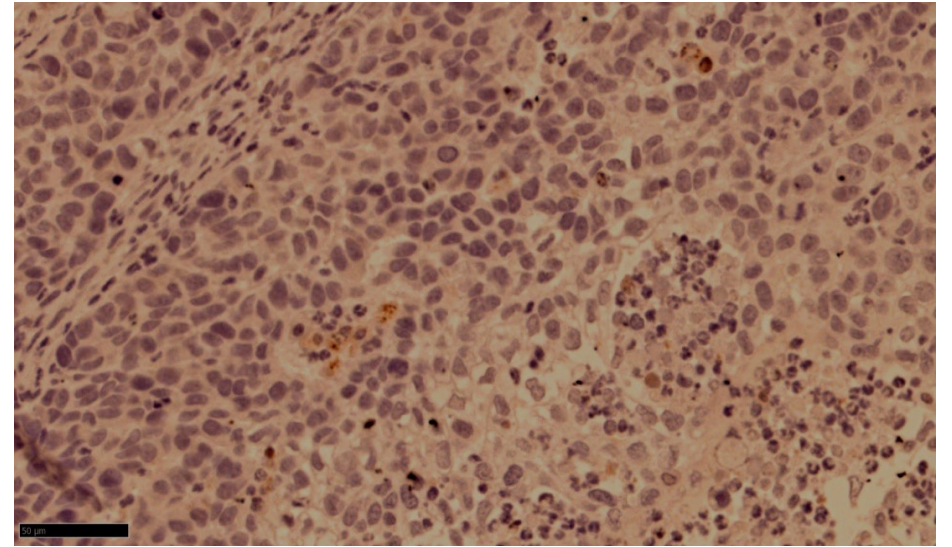

5-FU

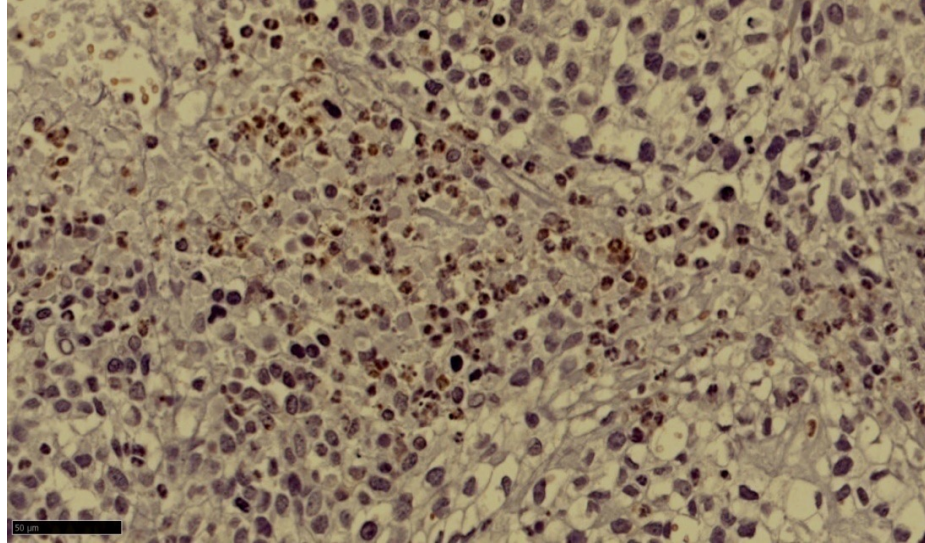

BI+5-FU

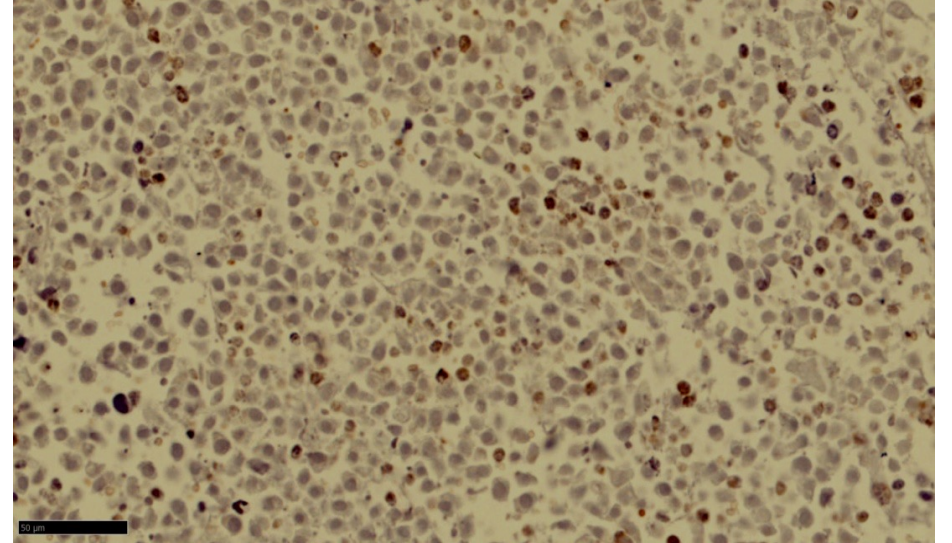

| caspase3 |                           | 右上                                                                                     | 右下 | 中   | 左上  | 左下 | 中2 |  |          |
|----------|---------------------------|----------------------------------------------------------------------------------------|----|-----|-----|----|----|--|----------|
| 18.12.9  | 19.9.27caspase3 联合 1 右    |  95 | 94 | 124 | 113 | 67 | 65 |  | 93       |
| 18.12.9  | 19.9.27caspase3 联合 1 左    | 71                                                                                     |    | 62  | 78  | 66 | 64 |  | 68.2     |
| 18.12.9  | 19.9.27caspase3 联合 右上     | 95                                                                                     | 85 | 88  | 89  | 81 | 71 |  | 84.83333 |
| 18.12.9  | 21.6.24caspase3 联合 右      | 35                                                                                     | 31 | 39  | 42  | 28 |    |  | 35       |
| 18.12.9  | 21.6.24caspase3 联合 左      | 27                                                                                     | 25 | 22  | 15  | 21 |    |  | 22       |
|          |                           |                                                                                        |    |     |     |    |    |  |          |
|          |                           |                                                                                        |    |     |     |    |    |  |          |
|          |                           |                                                                                        |    |     |     |    |    |  |          |
| 19.9.22  | 18.11.21 4组 BI 2 caspase3 | 5                                                                                      | 7  | 12  | 12  | 16 | 11 |  | 10.5     |
| 19.9.22  | 18.11.21 4组 BI 2 caspase3 | 6                                                                                      | 7  | 7   | 7   | 9  | 8  |  | 7.333333 |
| 19.9.22  | 18.11.21 BI caspase3 右    | 14                                                                                     | 6  | 8   | 11  | 5  |    |  | 8.8      |
| 19.9.22  | 18.11.21 BI caspase3 左2   | 5                                                                                      | 6  | 14  | 5   | 4  | 7  |  | 6.833333 |
| 19.9.22  | 18.11.21 BI caspase3 左上   | 9                                                                                      | 5  | 10  | 8   |    |    |  | 8        |
|          |                           |                                                                                        |    |     |     |    |    |  |          |
|          |                           |                                                                                        |    |     |     |    |    |  |          |
|          |                           |                                                                                        |    |     |     |    |    |  |          |
| 21.4.23  | 18.12.9 5-FU caspase3上    | 10                                                                                     | 11 | 15  | 7   | 9  |    |  | 10.4     |
| 21.4.23  | 18.12.9 5-FU caspase3下    | 8                                                                                      | 6  | 8   | 7   | 6  | 6  |  | 6.833333 |
| 21-6-24  | 18-12-9 5-FUcaspase3右     | 18                                                                                     | 16 | 20  | 13  | 8  |    |  | 15       |
| 21-6-24  | 18-12-9 5-FUcaspase3左     | 16                                                                                     | 11 | 11  | 15  |    | 9  |  | 12.4     |
|          |                           |                                                                                        |    |     |     |    |    |  |          |
|          |                           |                                                                                        |    |     |     |    |    |  |          |
|          |                           |                                                                                        |    |     |     |    |    |  |          |
| 19.9.22  | 18.11.21 对照 caspase3上     | 0                                                                                      | 0  | 1   | 0   | 2  | 0  |  | 0.5      |
| 19.9.22  | 18.11.21 对照 caspase3右     | 2                                                                                      | 0  | 0   | 0   | 1  | 0  |  | 0.5      |
| 19.9.22  | 18.11.21 对照 caspase3中     | 0                                                                                      | 0  | 1   | 0   | 0  | 0  |  | 0.166667 |
| 21-4-23  | 18.11.21 对照caspase3 上     | 0                                                                                      | 1  | 0   | 0   | 0  | 0  |  | 0.166667 |
| 21-4-23  | 18.11.21 对照caspase3 右上    | 0                                                                                      | 0  | 1   | 0   | 0  | 0  |  | 0.166667 |

**Figure 6C** The changes of pGSK-3 $\beta$  protein expression in SGC-7901 cells by immunofluorescence assay

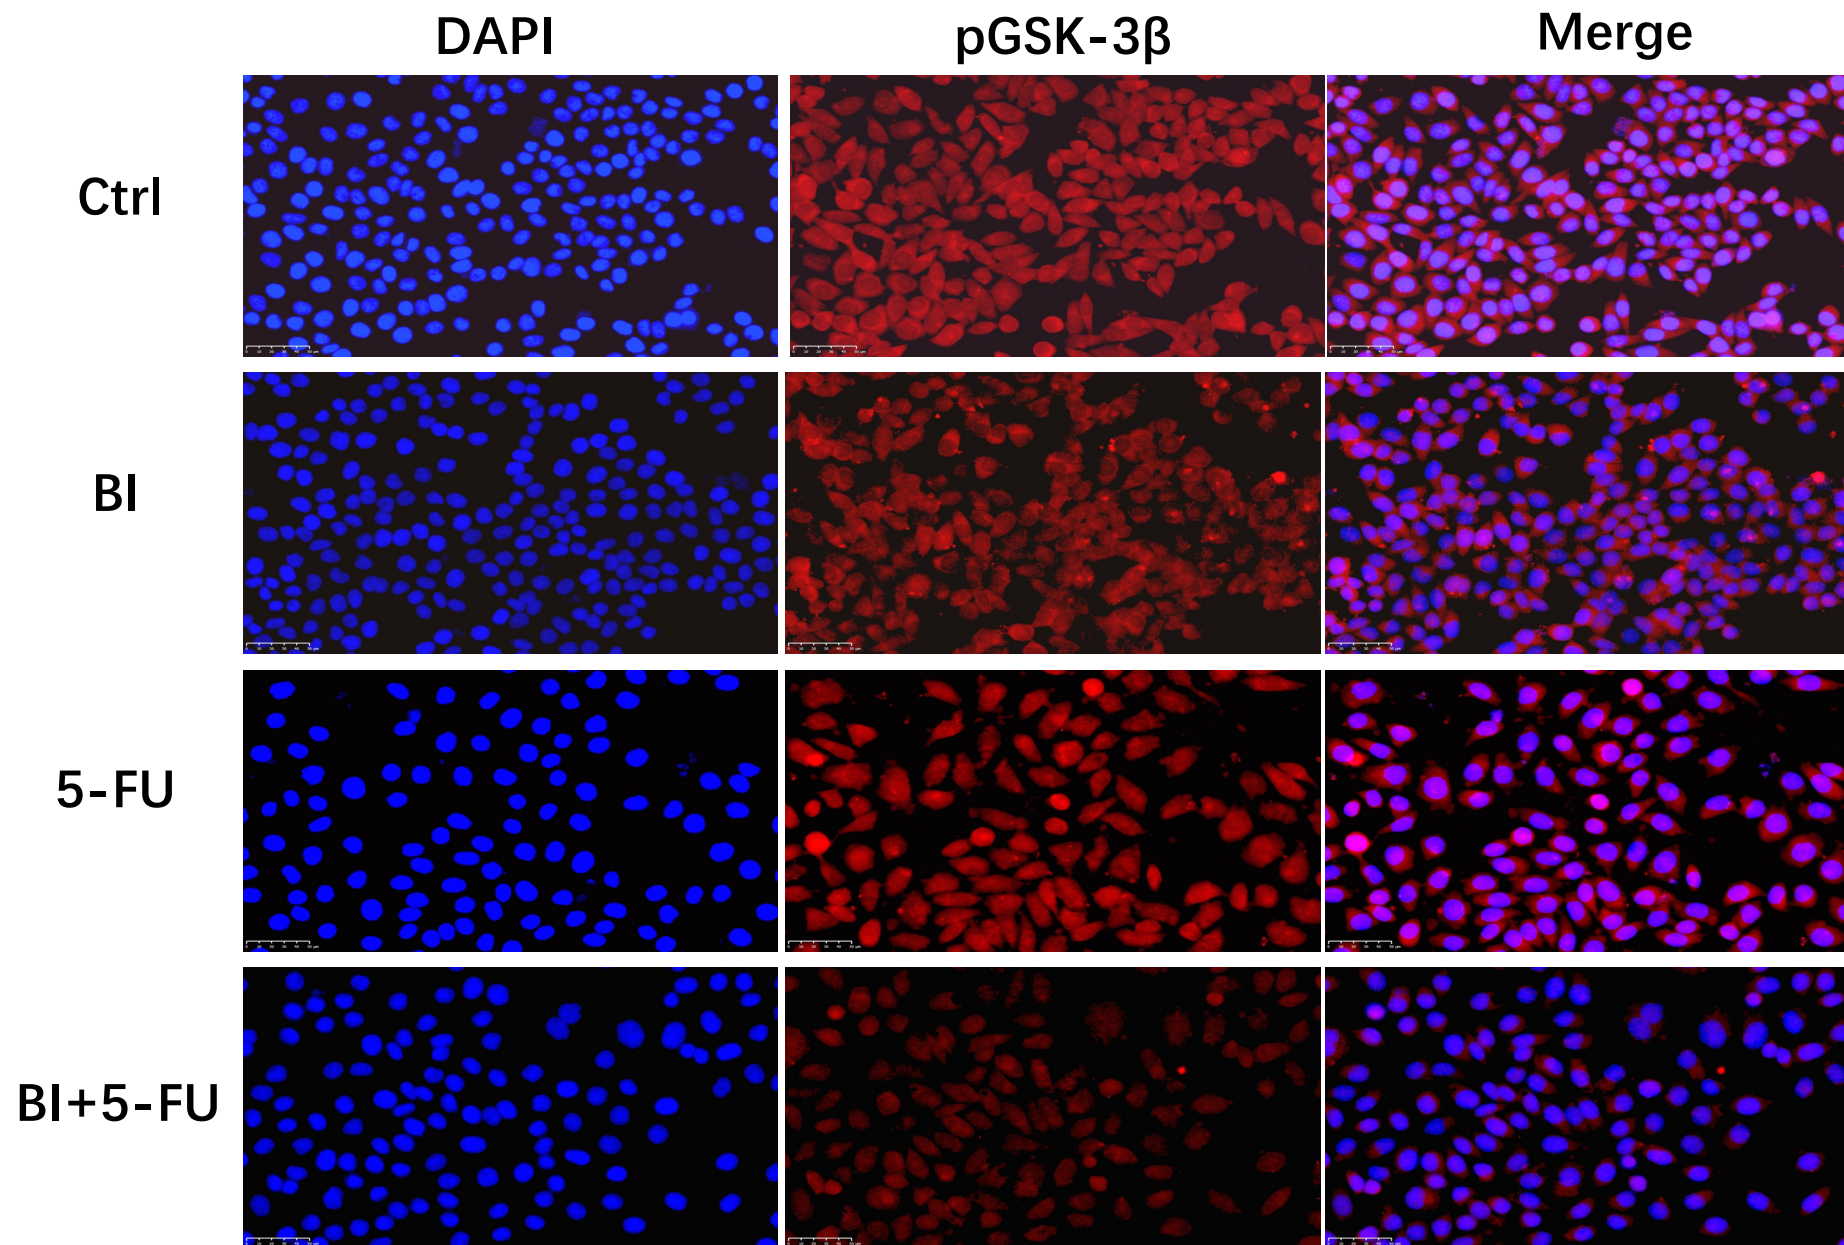

Supplement: pone.0309014.s002.pdf [file pone.0309014.s002.pdf]
