# Supplementary material for: β-Ionone enhances the inhibitory effects of 5-fluorouracil on the proliferation of gastric adenocarcinoma cells by the GSK-3β signaling pathway
Source: PubMed Central journal article supplement (PMC11379261; doi:10.1371/journal.pone.0309014), 2024-09-06

**Figure 2E** WB assessed the expression of **PCNA** after treatment of SGC-7901 cells with BI and 5-FU alone or in combination for 72h.

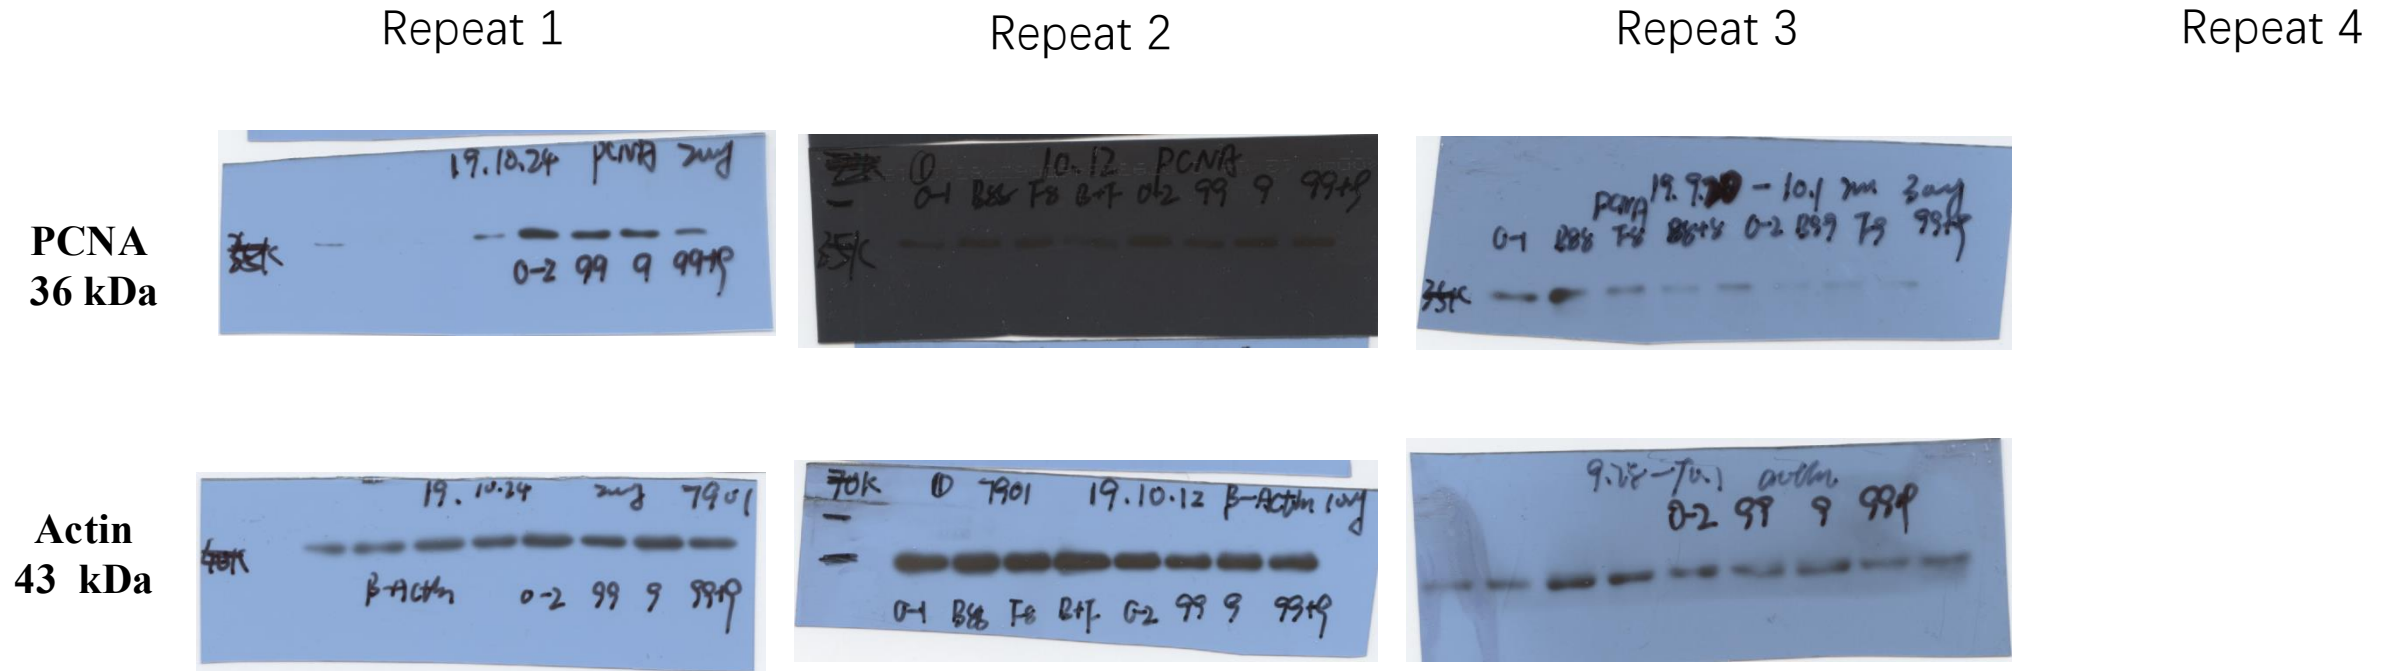

**Figure 2F** WB assessed the expression of **Cyclin D1** and **CDK4** after treatment of SGC-7901 cells with BI and 5-FU alone or in combination for 72h.

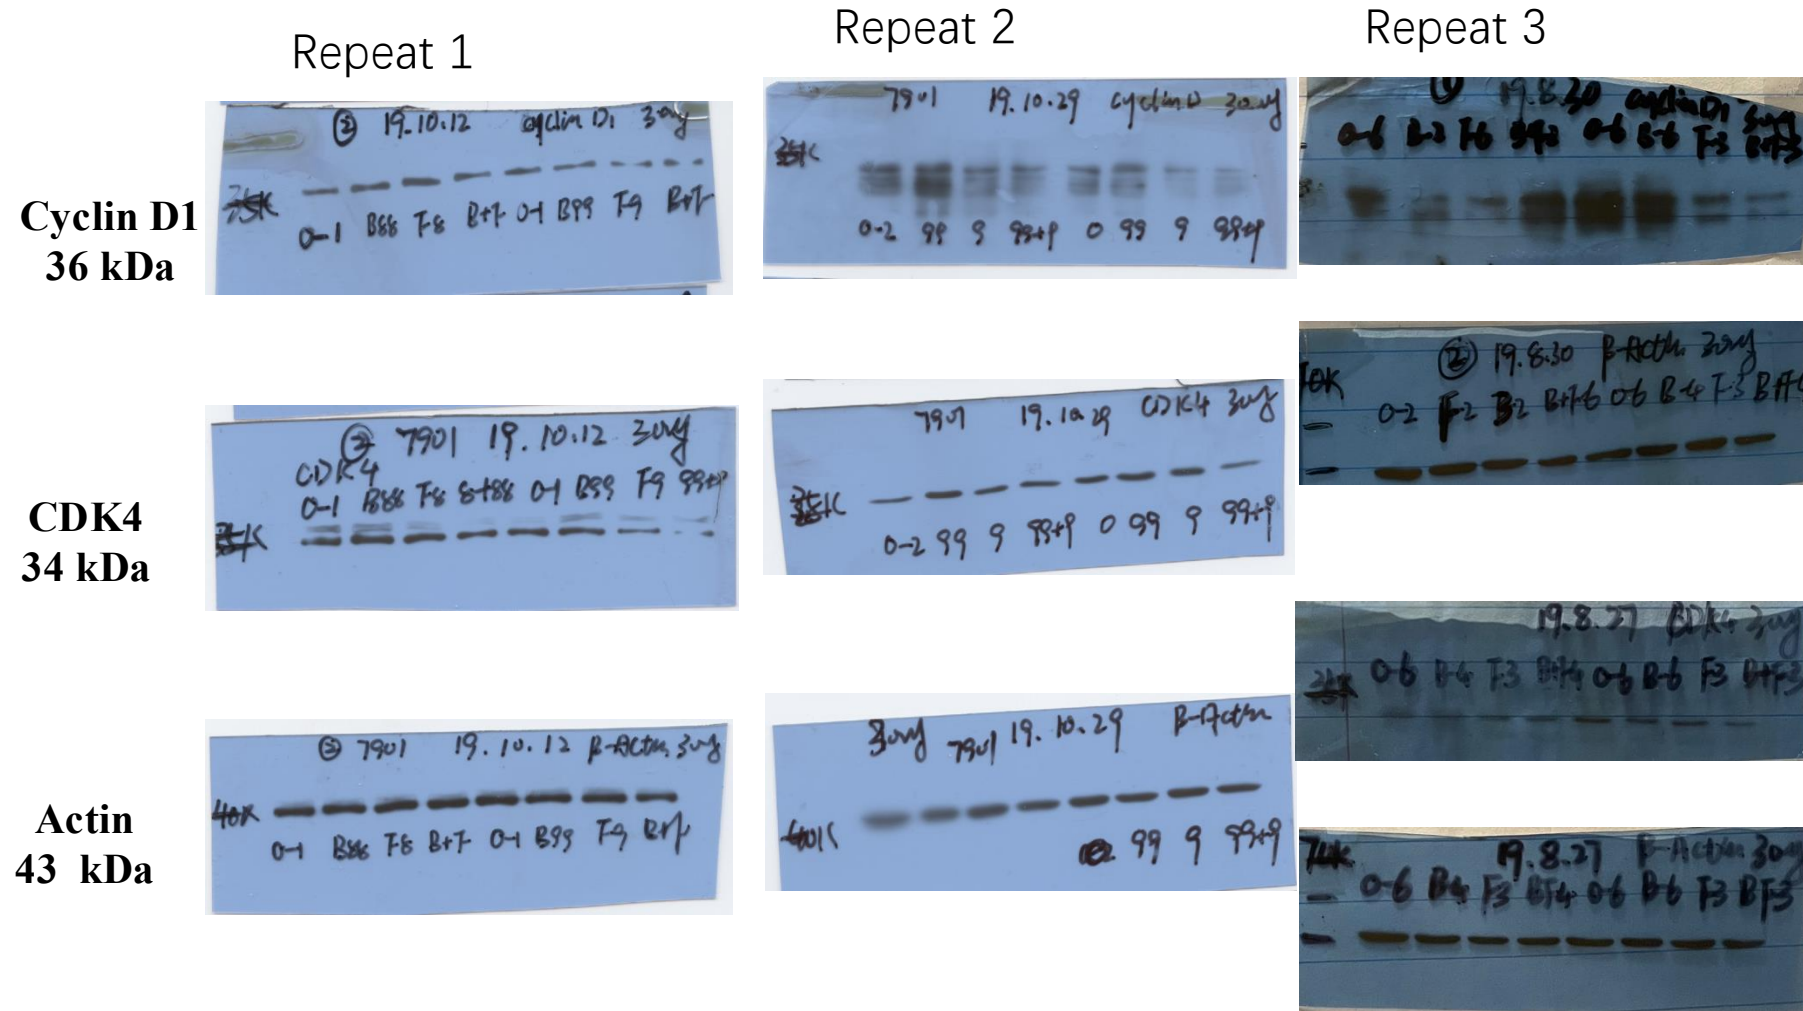

**Figure 5B** The expression of **PCNA** was detected in xenografts by Western blot

Repeat 1

Repeat 2

Repeat 3

Repeat 4

**PCNA**  
36 kDa

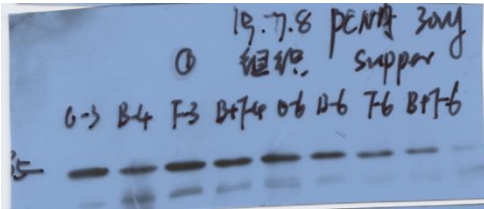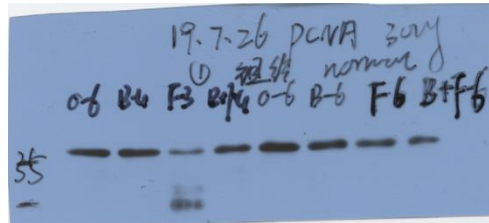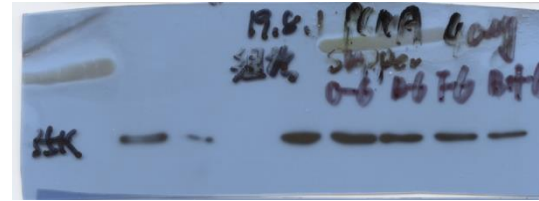

**PCNA**  
36 kDa

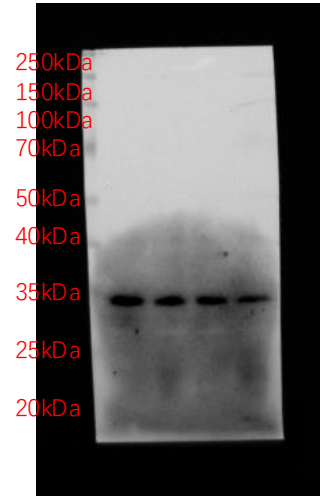

**Actin**  
43 kDa

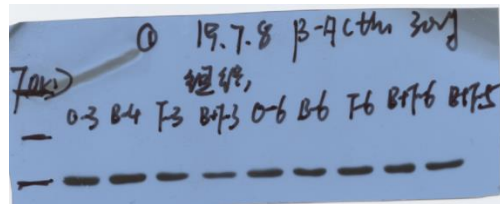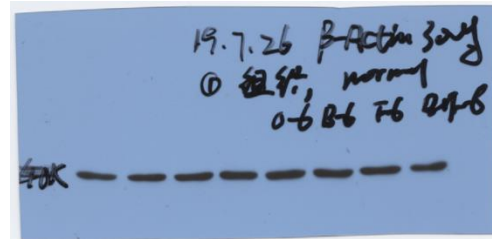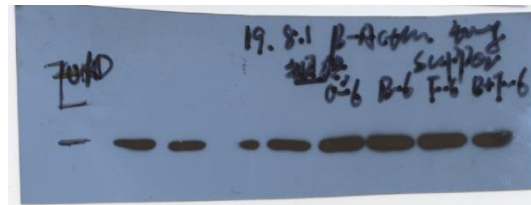

**Actin**  
43 kDa

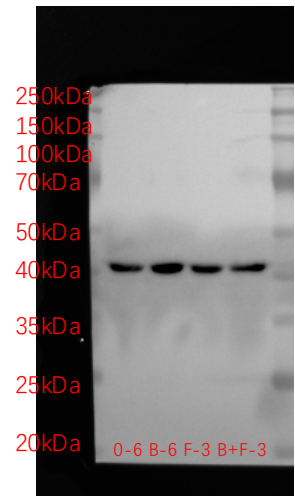

# Figure 5C The expression of Cyclin D1 and CDK4 in xenografts

Repeat 1

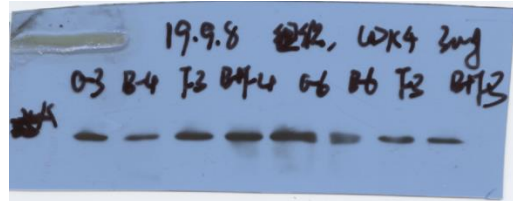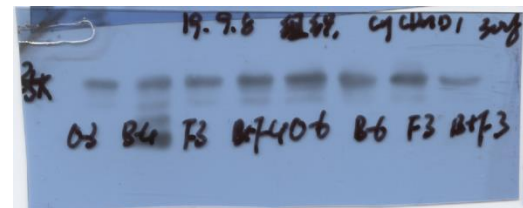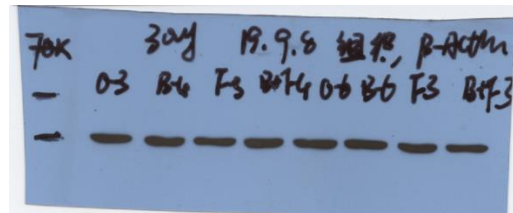

Repeat 2

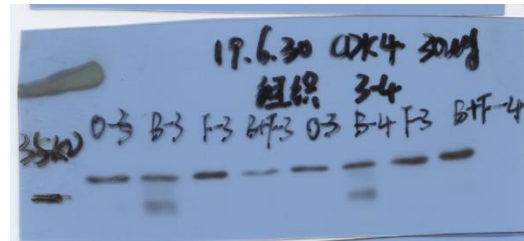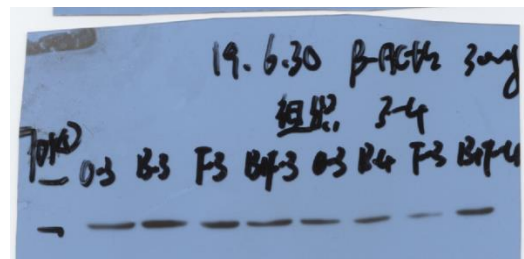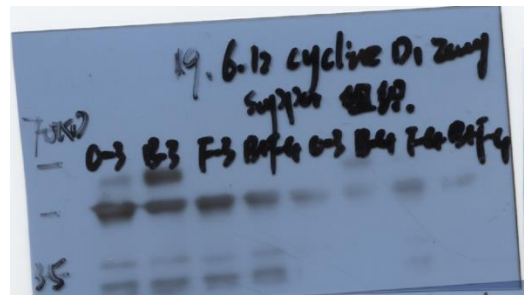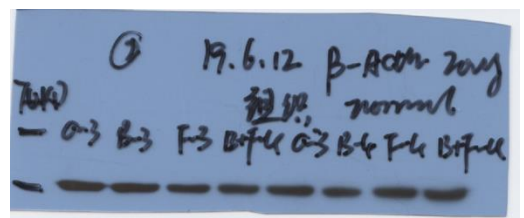

Repeat 3

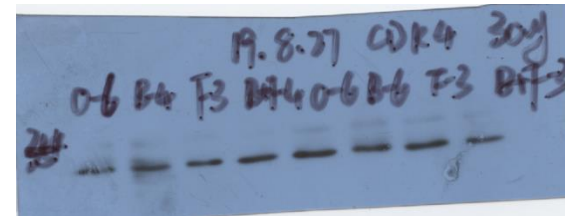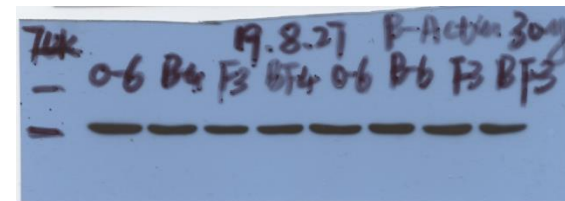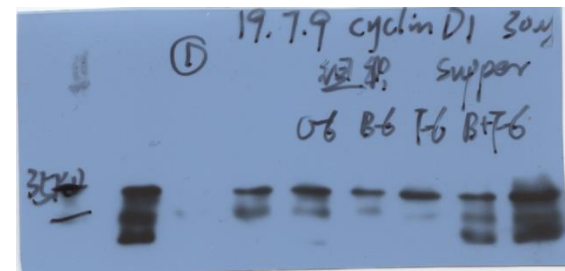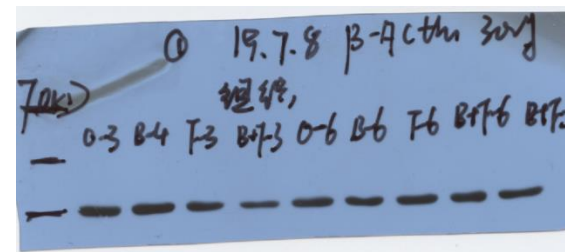

Repeat 4

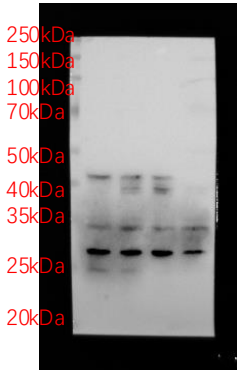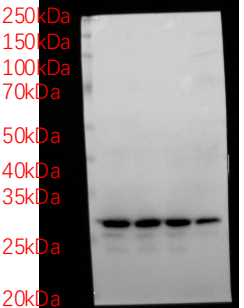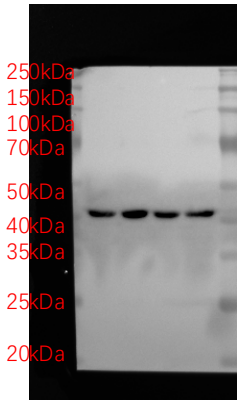

Cyclin D1  
36 kDa

CDK4  
34 kDa

Actin  
43 kDa

Cyclin D1  
36 kDa

CDK4  
34 kDa

Actin  
43 kDa

0-6 B-6 F-3 B+F-3

**Figure 6A** The expression of pGSK-3 $\beta$  protein was examined in SGC-7901 cells treated with different concentrations of BI by Western blot

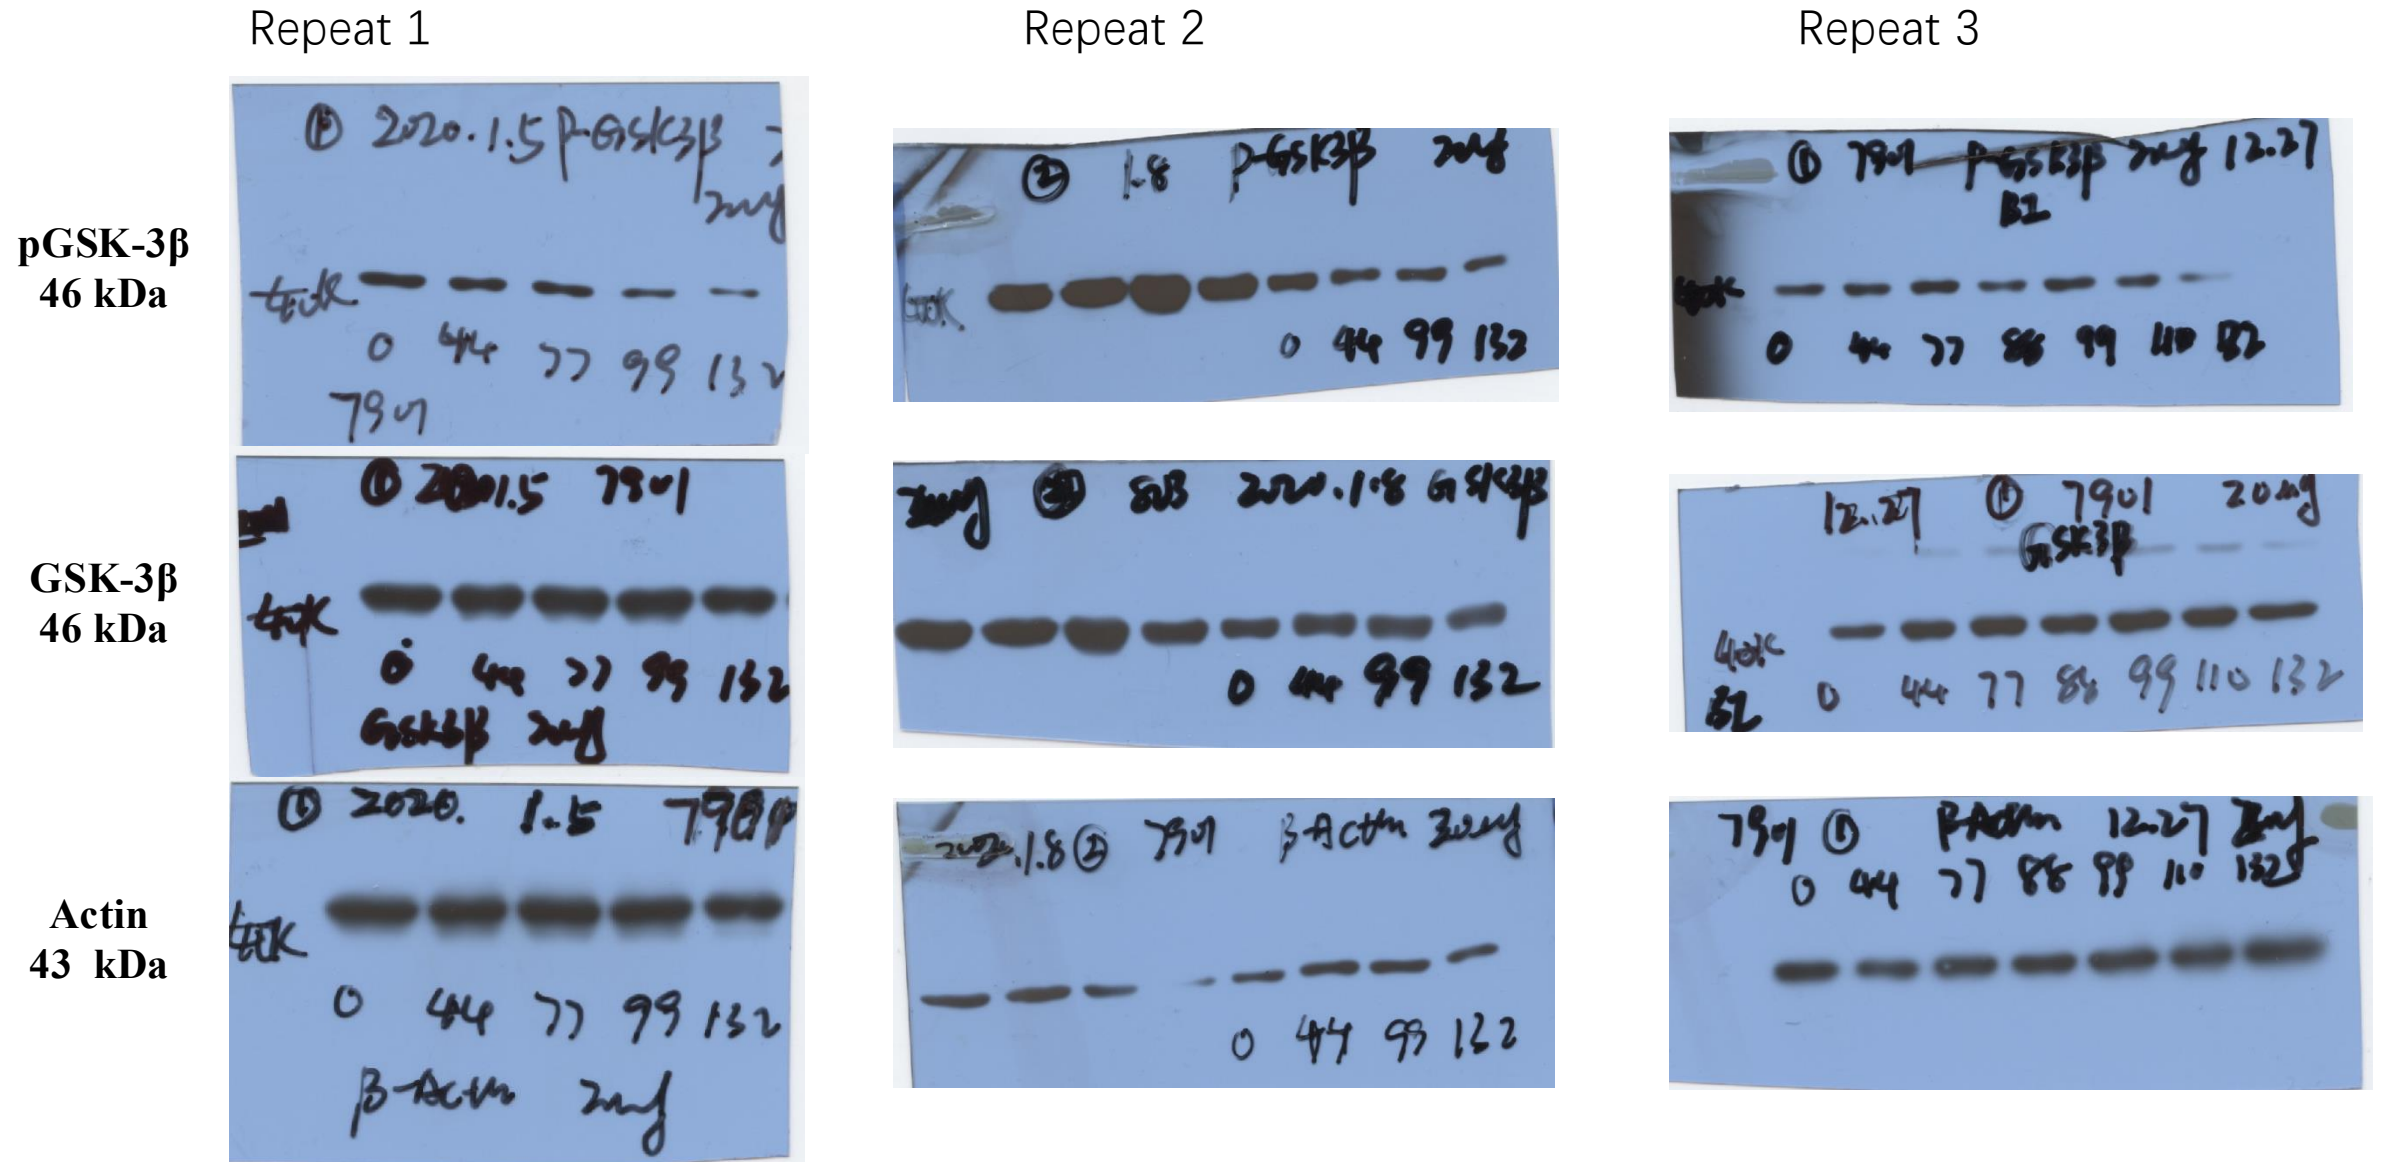

**Figure 6B** The expression of **pGSK-3 $\beta$**  protein was examined in SGC-7901 cells treated with BI and 5-FU alone and in their combination

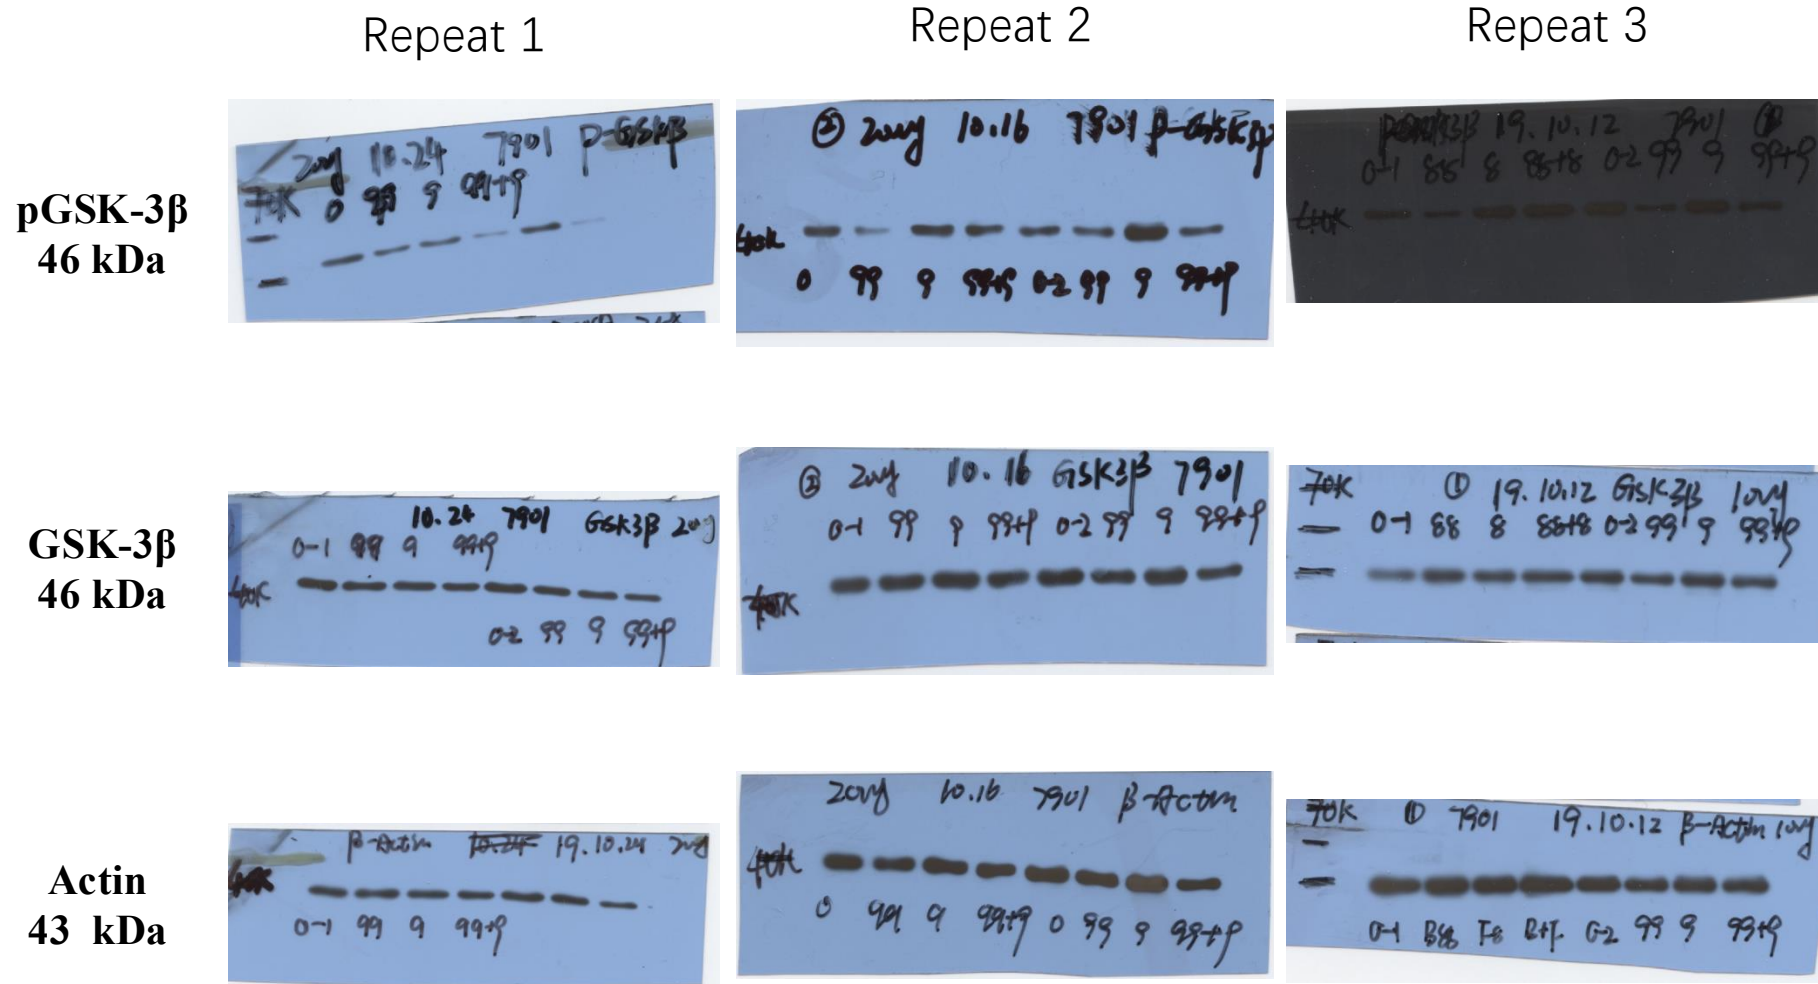

**Figure 6D** The expression of **pGSK-3 $\beta$**  protein in SGC-7901 cell xenografts

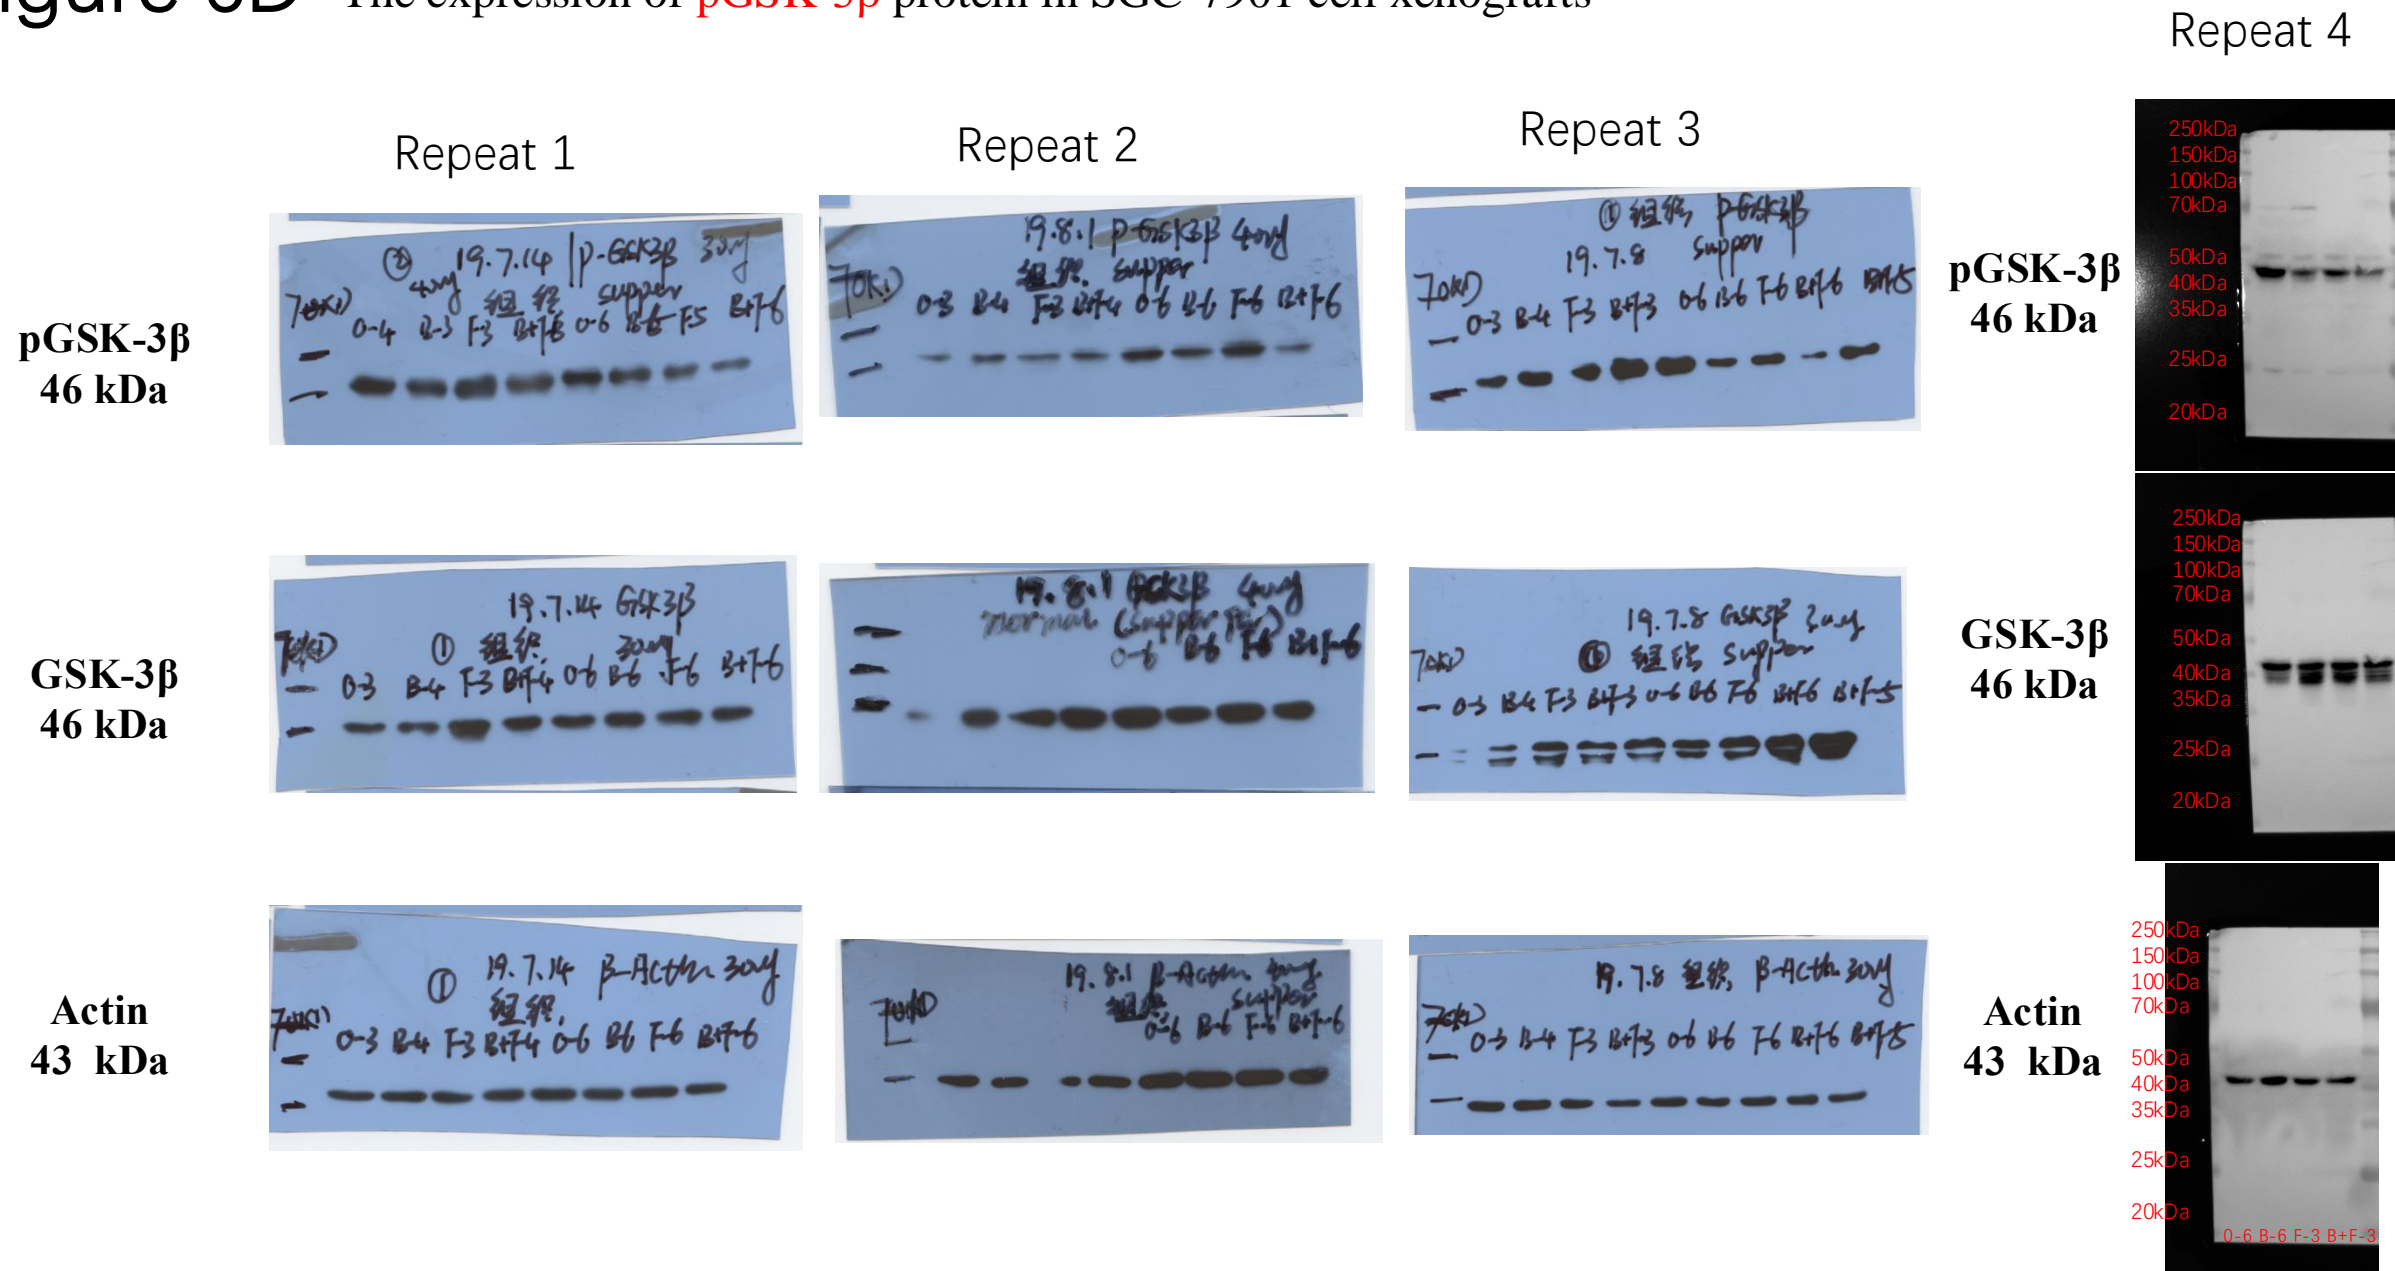

Supplement: pone.0309014.s003.pdf [file pone.0309014.s003.pdf]
