# Supplementary material for: β-Ionone enhances the inhibitory effects of 5-fluorouracil on the proliferation of gastric adenocarcinoma cells by the GSK-3β signaling pathway
Source: PubMed Central journal article supplement (PMC11379261; doi:10.1371/journal.pone.0309014), 2024-09-06
Supplement: pone.0309014.s001.pdf [file pone.0309014.s001.pdf]

**Figure 1G** Colony formation of SGC-7901 cells treated with BI (99 $\mu$ mol/L) and 5-FU (9 $\mu$ mol/L) alone or a combination for 14 days.

**SGC-7901 colony formation**

Ctrl                      BI                      5-FU                      BI+5-FU

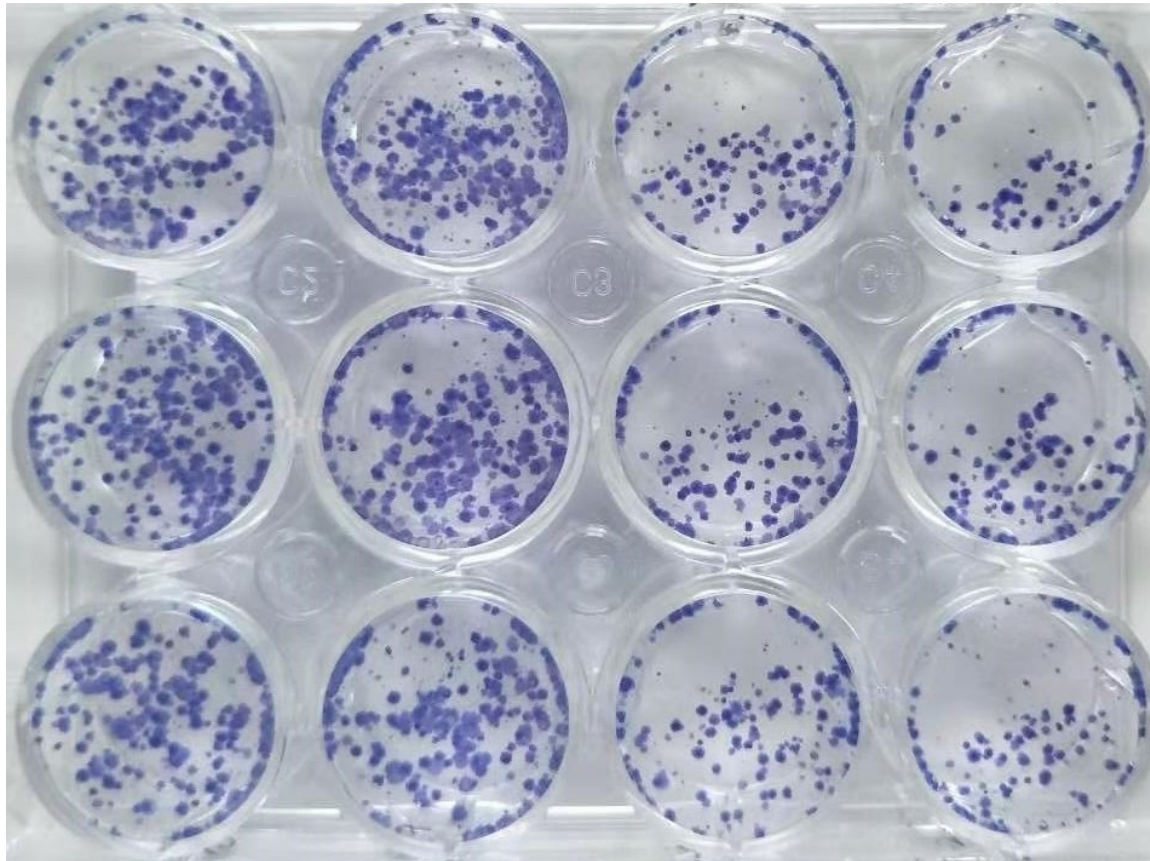

| 0   | BI  | 5-FU | BI+5-FU |
|-----|-----|------|---------|
| 134 | 102 | 71   | 41      |
| 140 | 107 | 63   | 58      |
| 121 | 102 | 67   | 39      |

| Ctrl   | BI-99  | 5-FU-9 | BI+5-FU |
|--------|--------|--------|---------|
| 0.3350 | 0.2550 | 0.1775 | 0.1025  |
| 0.3500 | 0.2675 | 0.1575 | 0.1450  |
| 0.3025 | 0.2550 | 0.1675 | 0.0975  |

Figure 2A SGC-7901 cells were harvested after treatment with BI (99  $\mu\text{mol/L}$ ) and 5-FU (9  $\mu\text{mol/L}$ ) alone or in combination for 72 h.

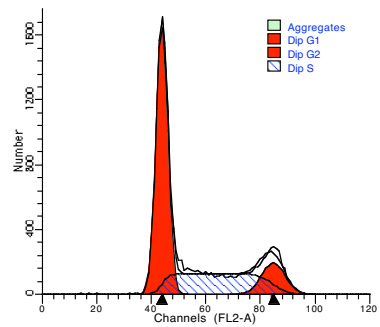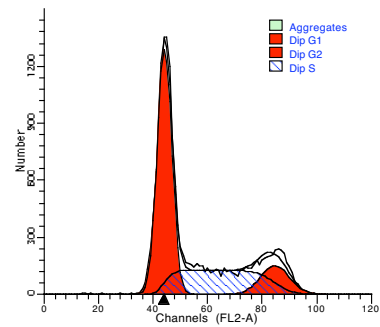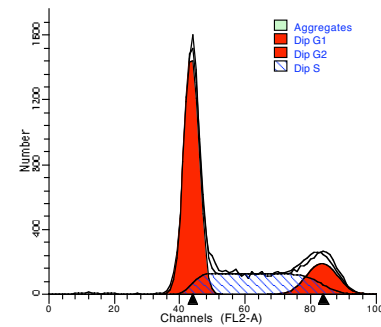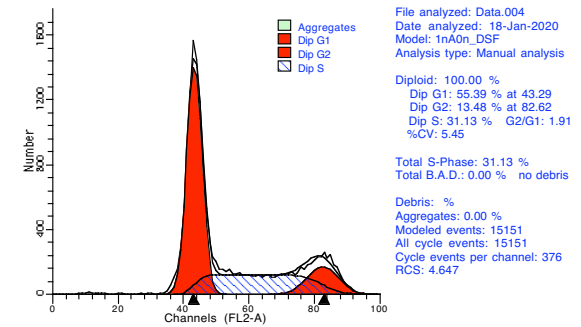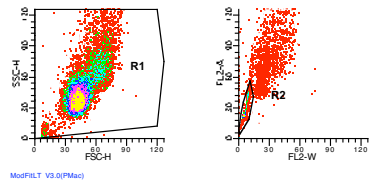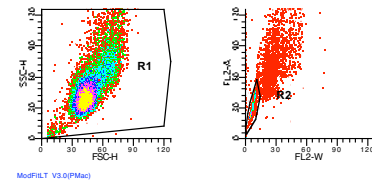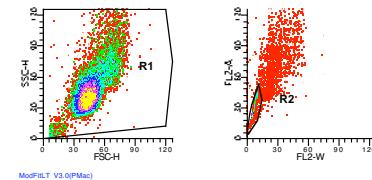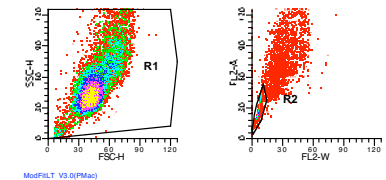

SGC-7901 Ctrl

# Figure 2A

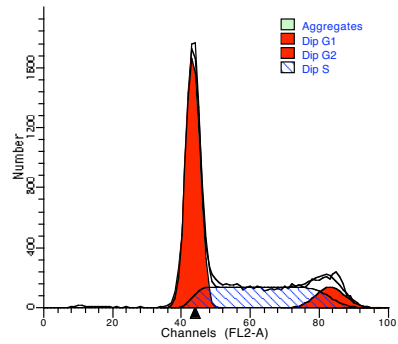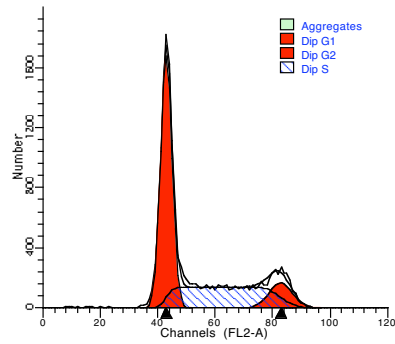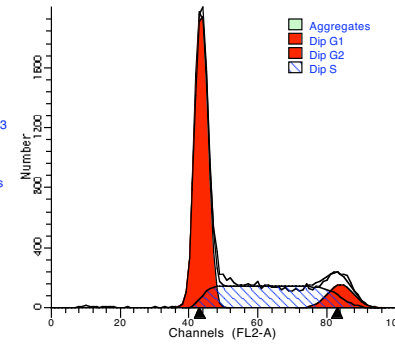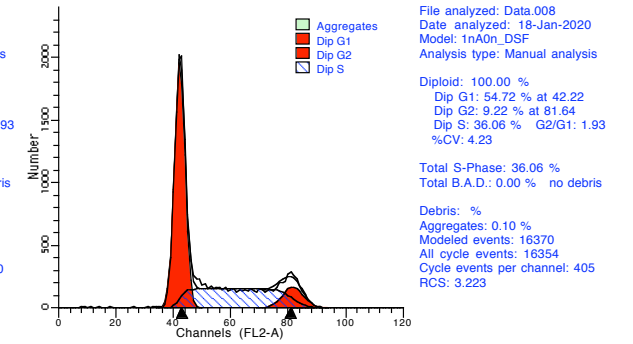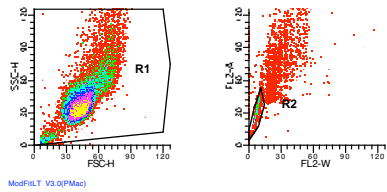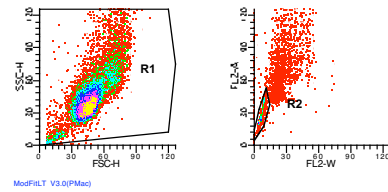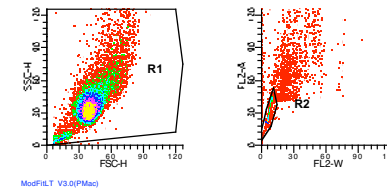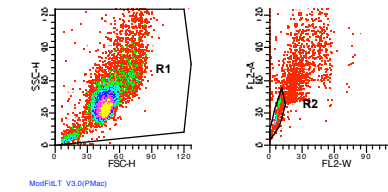

SGC-7901 BI

# Figure 2A

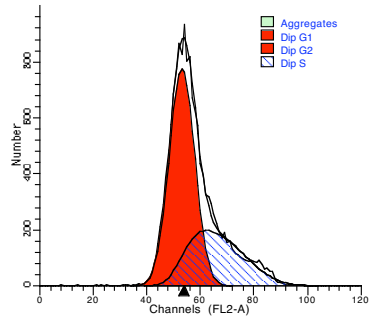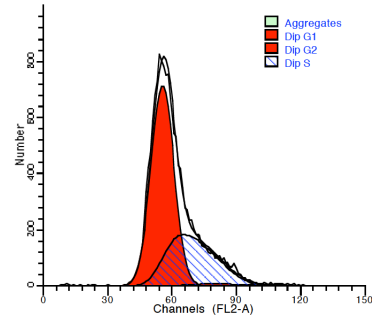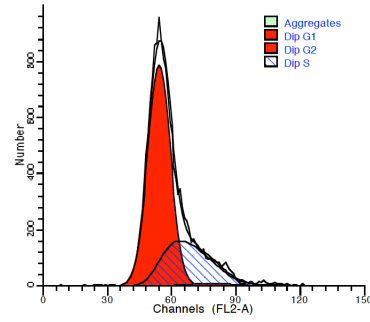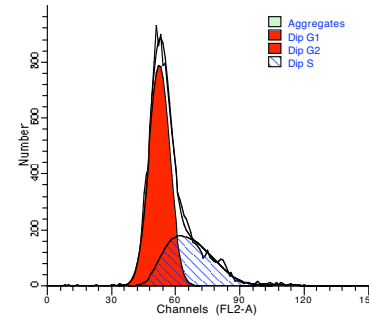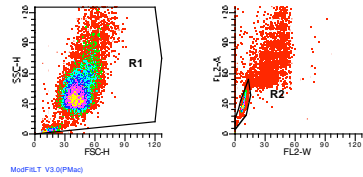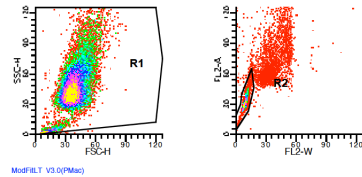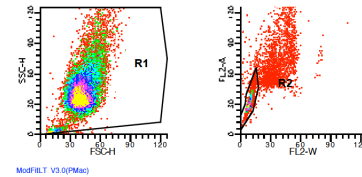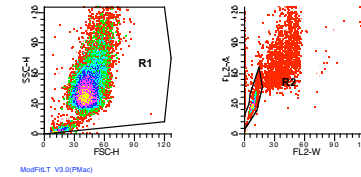

SGC-7901 5-FU

# Figure 2A

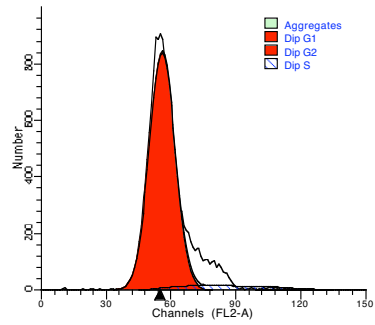

File analyzed: Data.013  
 Date analyzed: 18-Jan-2020  
 Model: 1nA0n\_DSF  
 Analysis type: Manual analysis

Diploid: 100.00 %  
 Dip G1: 93.62 % at 55.84  
 Dip G2: 0.00 % at 112.88  
 Dip S: 6.38 % G2/G1: 2.02  
 %CV: 10.54

Total S-Phase: 6.38 %  
 Total B.A.D.: 0.14 % no debris

Debris: %  
 Aggregates: 0.26 %  
 Modeled events: 13252  
 All cycle events: 13218  
 Cycle events per channel: 228  
 RCS: 15.639

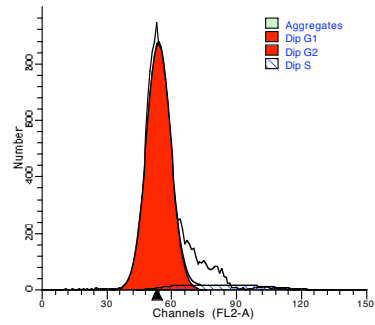

File analyzed: Data.014  
 Date analyzed: 18-Jan-2020  
 Model: 1nA0n\_DSF  
 Analysis type: Manual analysis

Diploid: 100.00 %  
 Dip G1: 92.46 % at 53.78  
 Dip G2: 0.00 % at 110.88  
 Dip S: 7.54 % G2/G1: 2.06  
 %CV: 10.32

Total S-Phase: 7.54 %  
 Total B.A.D.: 0.00 % no debris

Debris: %  
 Aggregates: 0.00 %  
 Modeled events: 13100  
 All cycle events: 13100  
 Cycle events per channel: 225  
 RCS: 13.698

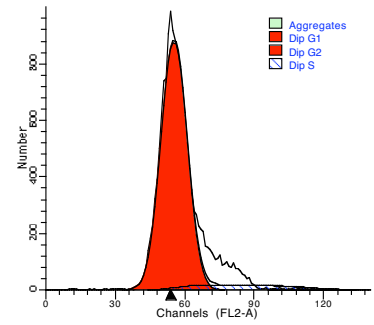

File analyzed: Data.015  
 Date analyzed: 18-Jan-2020  
 Model: 1nA0n\_DSF  
 Analysis type: Manual analysis

Diploid: 100.00 %  
 Dip G1: 92.93 % at 55.29  
 Dip G2: 0.00 % at 111.97  
 Dip S: 7.07 % G2/G1: 2.02  
 %CV: 10.13

Total S-Phase: 7.07 %  
 Total B.A.D.: 0.26 % no debris

Debris: %  
 Aggregates: 0.38 %  
 Modeled events: 13298  
 All cycle events: 13248  
 Cycle events per channel: 230  
 RCS: 18.536

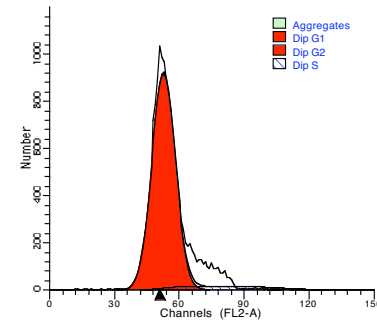

File analyzed: Data.016  
 Date analyzed: 18-Jan-2020  
 Model: 1nA0n\_DSF  
 Analysis type: Manual analysis

Diploid: 100.00 %  
 Dip G1: 93.52 % at 52.69  
 Dip G2: 0.00 % at 107.03  
 Dip S: 6.48 % G2/G1: 2.03  
 %CV: 10.14

Total S-Phase: 6.48 %  
 Total B.A.D.: 0.05 % no debris

Debris: %  
 Aggregates: 0.10 %  
 Modeled events: 13165  
 All cycle events: 13152  
 Cycle events per channel: 238  
 RCS: 15.326

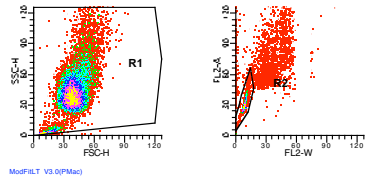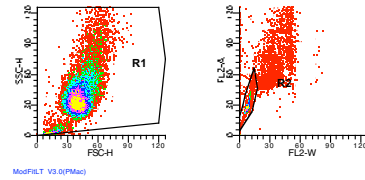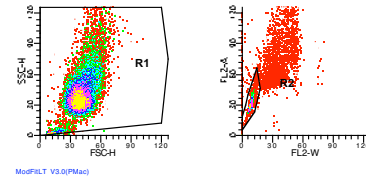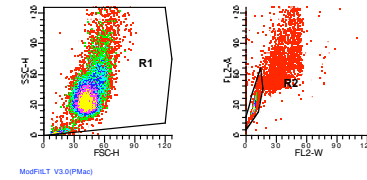

SGC-7901 BI+5-FU

# Figure 2A

|         |         | G1     | S      | G2     |
|---------|---------|--------|--------|--------|
| Control | 1       | 55.21% | 31.85% | 12.93% |
|         | 2       | 54.90% | 32.34% | 12.76% |
|         | 3       | 54.11% | 31.87% | 14.02% |
|         | 4       | 55.39% | 31.13% | 13.48% |
|         | average | 54.90% | 31.80% | 13.30% |
|         | SD      | 0.01   | 0.00   | 0.01   |
|         |         |        |        |        |
|         |         | G1     | S      | G2     |
| BI      | 1       | 55.49% | 35.34% | 9.17%  |
|         | 2       | 53.79% | 35.65% | 10.56% |
|         | 3       | 56.58% | 34.68% | 8.75%  |
|         | 4       | 54.72% | 36.06% | 9.22%  |
|         | average | 55.15% | 35.43% | 9.43%  |
|         | SD      | 0.01   | 0.01   | 0.01   |
|         |         |        |        |        |
|         |         | G1     | S      | G2     |
| 5-FU    | 1       | 64.29% | 35.71% | 0.00%  |
|         | 2       | 63.99% | 34.54% | 1.46%  |
|         | 3       | 69.08% | 29.29% | 1.63%  |
|         | 4       | 65.98% | 34.02% | 0.00%  |
|         | average | 65.84% | 33.39% | 0.77%  |
|         | SD      | 0.02   | 0.03   | 0.01   |
|         |         |        |        |        |
|         |         | G1     | S      | G2     |
| BI+5-FU | 1       | 93.62% | 6.38%  | 0.00%  |
|         | 2       | 92.46% | 7.54%  | 0.00%  |
|         | 3       | 92.93% | 7.07%  | 0.00%  |
|         | 4       | 93.52% | 6.48%  | 0.00%  |
|         | average | 93.13% | 6.87%  | 0.00%  |
|         | SD      | 0.01   | 0.01   | 0.00   |

# Figure 2C MKN45 cells were harvested after treatment with BI (168 $\mu\text{mol/L}$ ) and 5-FU (0.9 $\mu\text{mol/L}$ ) alone or in combination for 72h.

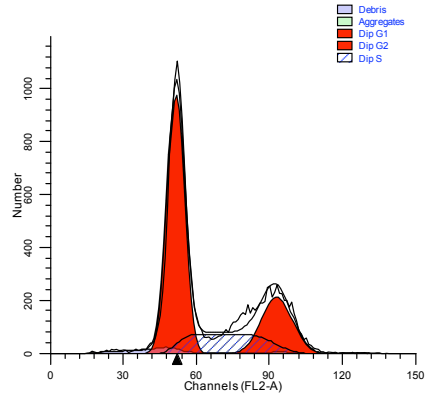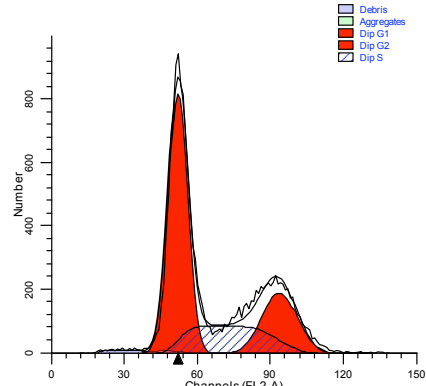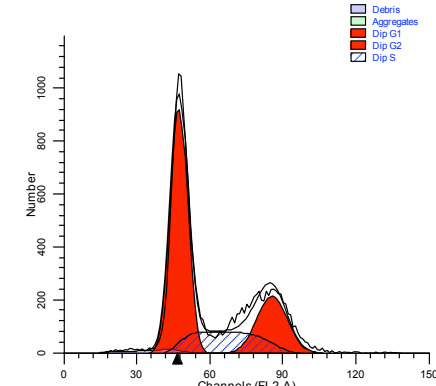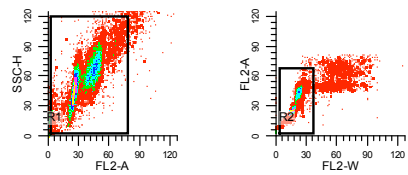

ModFILT V3.2(Mac)

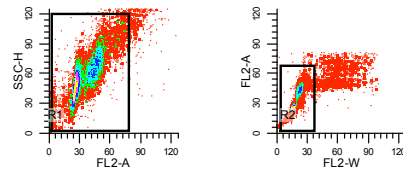

ModFILT V3.2(Mac)

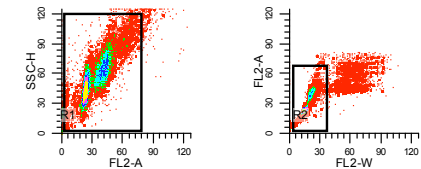

ModFILT V3.2(Mac)

MKN45 Ctrl

# Figure 2C

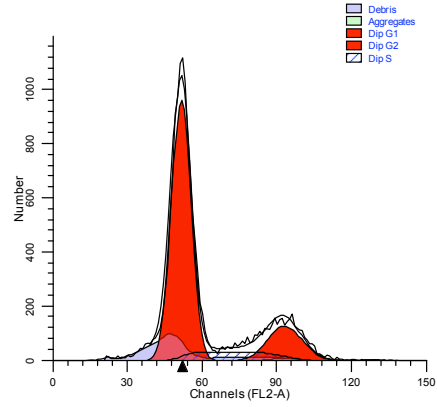

File analyzed: K-BI.001  
 Date analyzed: 31-May-2023  
 Model: 1DA0n\_DSD  
 Analysis type: Manual analysis

Ploidy Mode: First cycle is diploid

Diploid: 100.00 %  
 Dip G1: 71.97 % at 51.89  
 Dip G2: 17.18 % at 93.40  
 Dip S: 10.85 % G2/G1: 1.80  
 %CV: 7.38

Total S-Phase: 10.85 %  
 Total B.A.D.: 9.93 %

Debris: 14.82 %  
 Aggregates: 1.30 %  
 Modeled events: 15386  
 All cycle events: 12906  
 Cycle events per channel: 304  
 RCS: 1.598

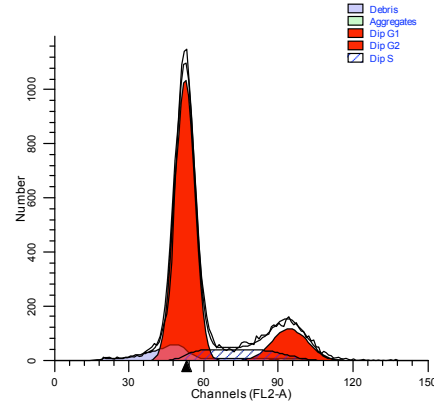

File analyzed: K-BI.002  
 Date analyzed: 31-May-2023  
 Model: 1DA0n\_DSD  
 Analysis type: Manual analysis

Ploidy Mode: First cycle is diploid

Diploid: 100.00 %  
 Dip G1: 72.57 % at 52.65  
 Dip G2: 14.97 % at 94.77  
 Dip S: 12.46 % G2/G1: 1.80  
 %CV: 7.40

Total S-Phase: 12.46 %  
 Total B.A.D.: 5.74 %

Debris: 9.36 %  
 Aggregates: 1.06 %  
 Modeled events: 15664  
 All cycle events: 14031  
 Cycle events per channel: 325  
 RCS: 1.668

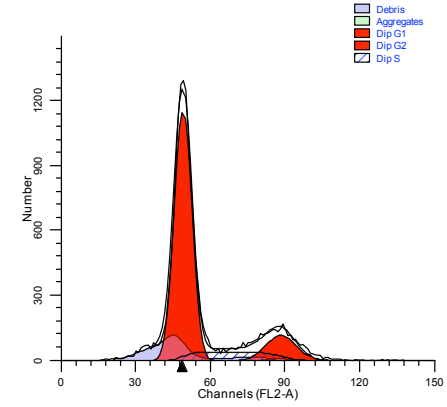

File analyzed: K-BI.003  
 Date analyzed: 31-May-2023  
 Model: 1DA0n\_DSD  
 Analysis type: Manual analysis

Ploidy Mode: First cycle is diploid

Diploid: 100.00 %  
 Dip G1: 73.87 % at 49.23  
 Dip G2: 13.83 % at 88.61  
 Dip S: 12.50 % G2/G1: 1.80  
 %CV: 6.92

Total S-Phase: 12.50 %  
 Total B.A.D.: 9.69 %

Debris: 15.70 %  
 Aggregates: 1.08 %  
 Modeled events: 16001  
 All cycle events: 13317  
 Cycle events per channel: 330  
 RCS: 2.269

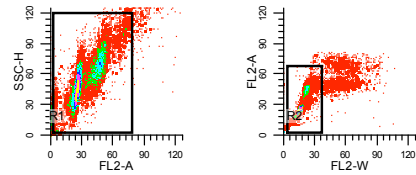

ModFILT V3.2(Mac)

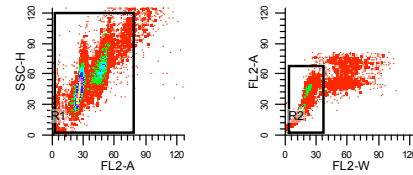

ModFILT V3.2(Mac)

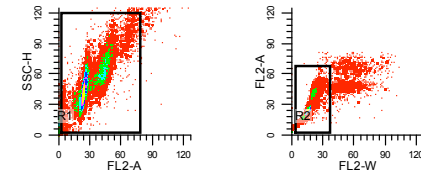

ModFILT V3.2(Mac)

MKN45 BI



# Figure 2C

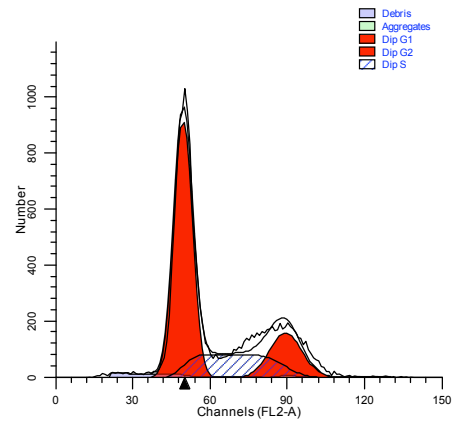

File analyzed: K-5-FU.001  
 Date analyzed: 31-May-2023  
 Model: 1DA0n\_DSD  
 Analysis type: Manual analysis  
 Ploidy Mode: First cycle is diploid  
 Diploid: 100.00 %  
 Dip G1: 57.68 % at 49.73  
 Dip G2: 18.34 % at 89.52  
 Dip S: 23.98 % G2/G1: 1.80  
 %CV: 7.04  
 Total S-Phase: 23.98 %  
 Total B.A.D.: 1.97 %  
 Debris: 3.75 %  
 Aggregates: 1.26 %  
 Modeled events: 14668  
 All cycle events: 13934  
 Cycle events per channel: 342  
 RCS: 2.976

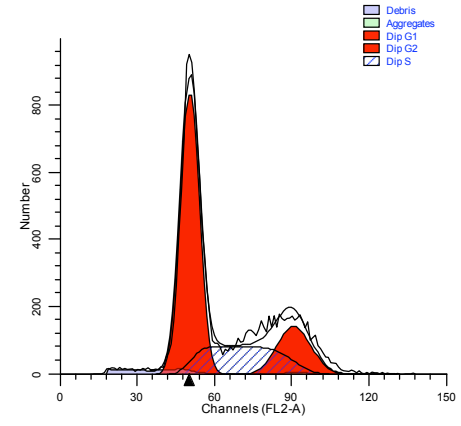

File analyzed: K-5-FU.002  
 Date analyzed: 31-May-2023  
 Model: 1DA0n\_DSD  
 Analysis type: Manual analysis  
 Ploidy Mode: First cycle is diploid  
 Diploid: 100.00 %  
 Dip G1: 57.04 % at 50.55  
 Dip G2: 17.88 % at 90.99  
 Dip S: 25.28 % G2/G1: 1.80  
 %CV: 7.17  
 Total S-Phase: 25.28 %  
 Total B.A.D.: 2.52 %  
 Debris: 4.76 %  
 Aggregates: 1.31 %  
 Modeled events: 14295  
 All cycle events: 13426  
 Cycle events per channel: 324  
 RCS: 3.124

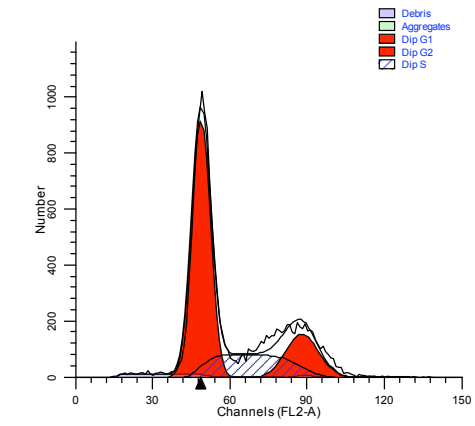

File analyzed: K-5-FU.003  
 Date analyzed: 31-May-2023  
 Model: 1DA0n\_DSD  
 Analysis type: Manual analysis  
 Ploidy Mode: First cycle is diploid  
 Diploid: 100.00 %  
 Dip G1: 58.84 % at 49.08  
 Dip G2: 18.17 % at 88.34  
 Dip S: 22.98 % G2/G1: 1.80  
 %CV: 7.22  
 Total S-Phase: 22.98 %  
 Total B.A.D.: 2.05 %  
 Debris: 4.14 %  
 Aggregates: 1.25 %  
 Modeled events: 14637  
 All cycle events: 13847  
 Cycle events per channel: 344  
 RCS: 3.351

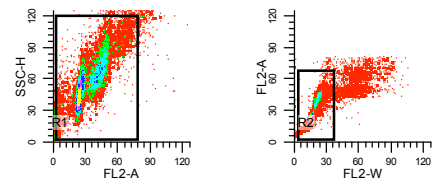

ModFILT V3.2(Mac)

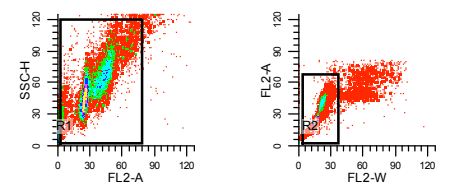

ModFILT V3.2(Mac)

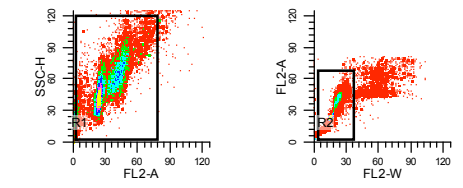

ModFILT V3.2(Mac)

MKN45 5-FU

# Figure 2C

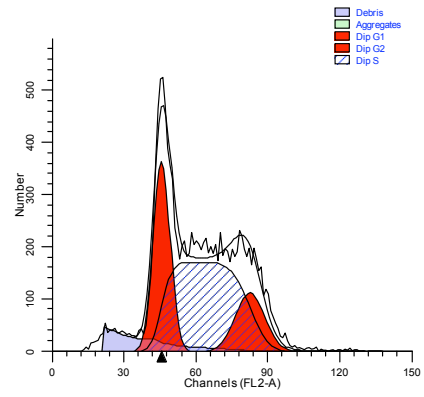

File analyzed: K-C.001  
 Date analyzed: 31-May-2023  
 Model: 1DA0n\_DSD  
 Analysis type: Manual analysis  
 Ploidy Mode: First cycle is diploid  
 Diploid: 100.00 %  
 Dip G1: 28.19 % at 46.02  
 Dip G2: 15.61 % at 82.83  
 Dip S: 56.20 % G2/G1: 1.80  
 %CV: 7.50  
 Total S-Phase: 56.20 %  
 Total B.A.D.: 4.02 %  
 Debris: 8.68 %  
 Aggregates: 1.23 %  
 Modeled events: 12490  
 All cycle events: 11253  
 Cycle events per channel: 298  
 RCS: 2.708

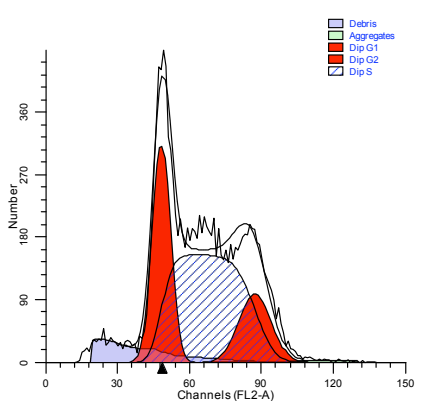

File analyzed: K-C.002  
 Date analyzed: 31-May-2023  
 Model: 1DA0n\_DSD  
 Analysis type: Manual analysis  
 Ploidy Mode: First cycle is diploid  
 Diploid: 100.00 %  
 Dip G1: 27.69 % at 48.65  
 Dip G2: 15.71 % at 87.56  
 Dip S: 56.60 % G2/G1: 1.80  
 %CV: 7.69  
 Total S-Phase: 56.60 %  
 Total B.A.D.: 3.93 %  
 Debris: 8.94 %  
 Aggregates: 1.12 %  
 Modeled events: 11838  
 All cycle events: 10648  
 Cycle events per channel: 267  
 RCS: 2.270

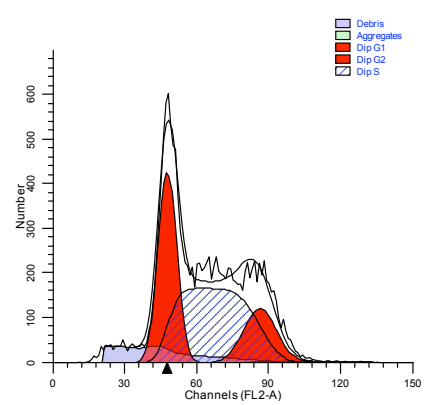

File analyzed: K-C.003  
 Date analyzed: 31-May-2023  
 Model: 1DA0n\_DSD  
 Analysis type: Manual analysis  
 Ploidy Mode: First cycle is diploid  
 Diploid: 100.00 %  
 Dip G1: 32.43 % at 48.22  
 Dip G2: 16.66 % at 86.80  
 Dip S: 50.91 % G2/G1: 1.80  
 %CV: 7.93  
 Total S-Phase: 50.91 %  
 Total B.A.D.: 6.12 %  
 Debris: 10.75 %  
 Aggregates: 0.87 %  
 Modeled events: 14302  
 All cycle events: 12639  
 Cycle events per channel: 319  
 RCS: 2.384

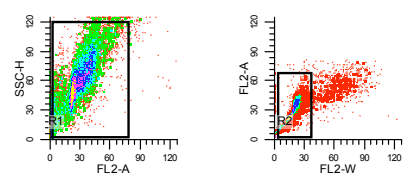

ModFILT V3.2(Mac)

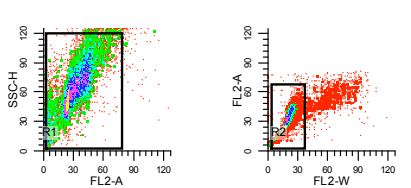

ModFILT V3.2(Mac)

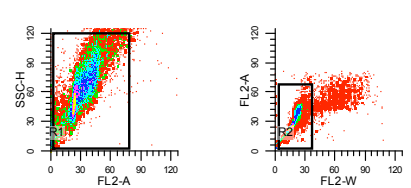

ModFILT V3.2(Mac)

MKN45 BI+5-FU

# Figure 2C

| MKN45 CELL |        |        |        |        |        |        |        |        |        |  |        |       |        |       |        |       |
|------------|--------|--------|--------|--------|--------|--------|--------|--------|--------|--|--------|-------|--------|-------|--------|-------|
|            | G0/G1  |        |        | S      |        |        | G2/M   |        |        |  | G0/G1  |       | S      |       | G2/M   |       |
|            | 1      | 2      | 3      | 1      | 2      | 3      | 1      | 2      | 3      |  | MEAN   | SD    | MEAN   | SD    | MEAN   | SD    |
| CTRL       | 57.03% | 53.67% | 55.59% | 20.55% | 23.75% | 21.01% | 22.42% | 22.58% | 23.40% |  | 55.43% | 1.38% | 21.77% | 1.41% | 22.80% | 0.43% |
| BI         | 71.97% | 72.57% | 73.87% | 10.85% | 12.46% | 12.50% | 17.18% | 14.97% | 13.63% |  | 72.80% | 0.79% | 11.94% | 0.77% | 15.26% | 1.46% |
| 5-FU       | 57.68% | 57.04% | 58.84% | 23.98% | 25.28% | 22.98% | 18.34% | 17.68% | 18.17% |  | 57.85% | 0.74% | 24.08% | 0.94% | 18.06% | 0.28% |
| C          | 28.19% | 27.69% | 32.43% | 56.20% | 56.60% | 50.91% | 15.61% | 15.71% | 16.66% |  | 29.44% | 2.13% | 54.57% | 2.59% | 15.99% | 0.47% |

**Figure 3A** Apoptosis of SGC-7901 cells was detected by Annexin V-FITC/PI double staining assay after 6h of treatments with BI, 5-FU alone, or their combination.

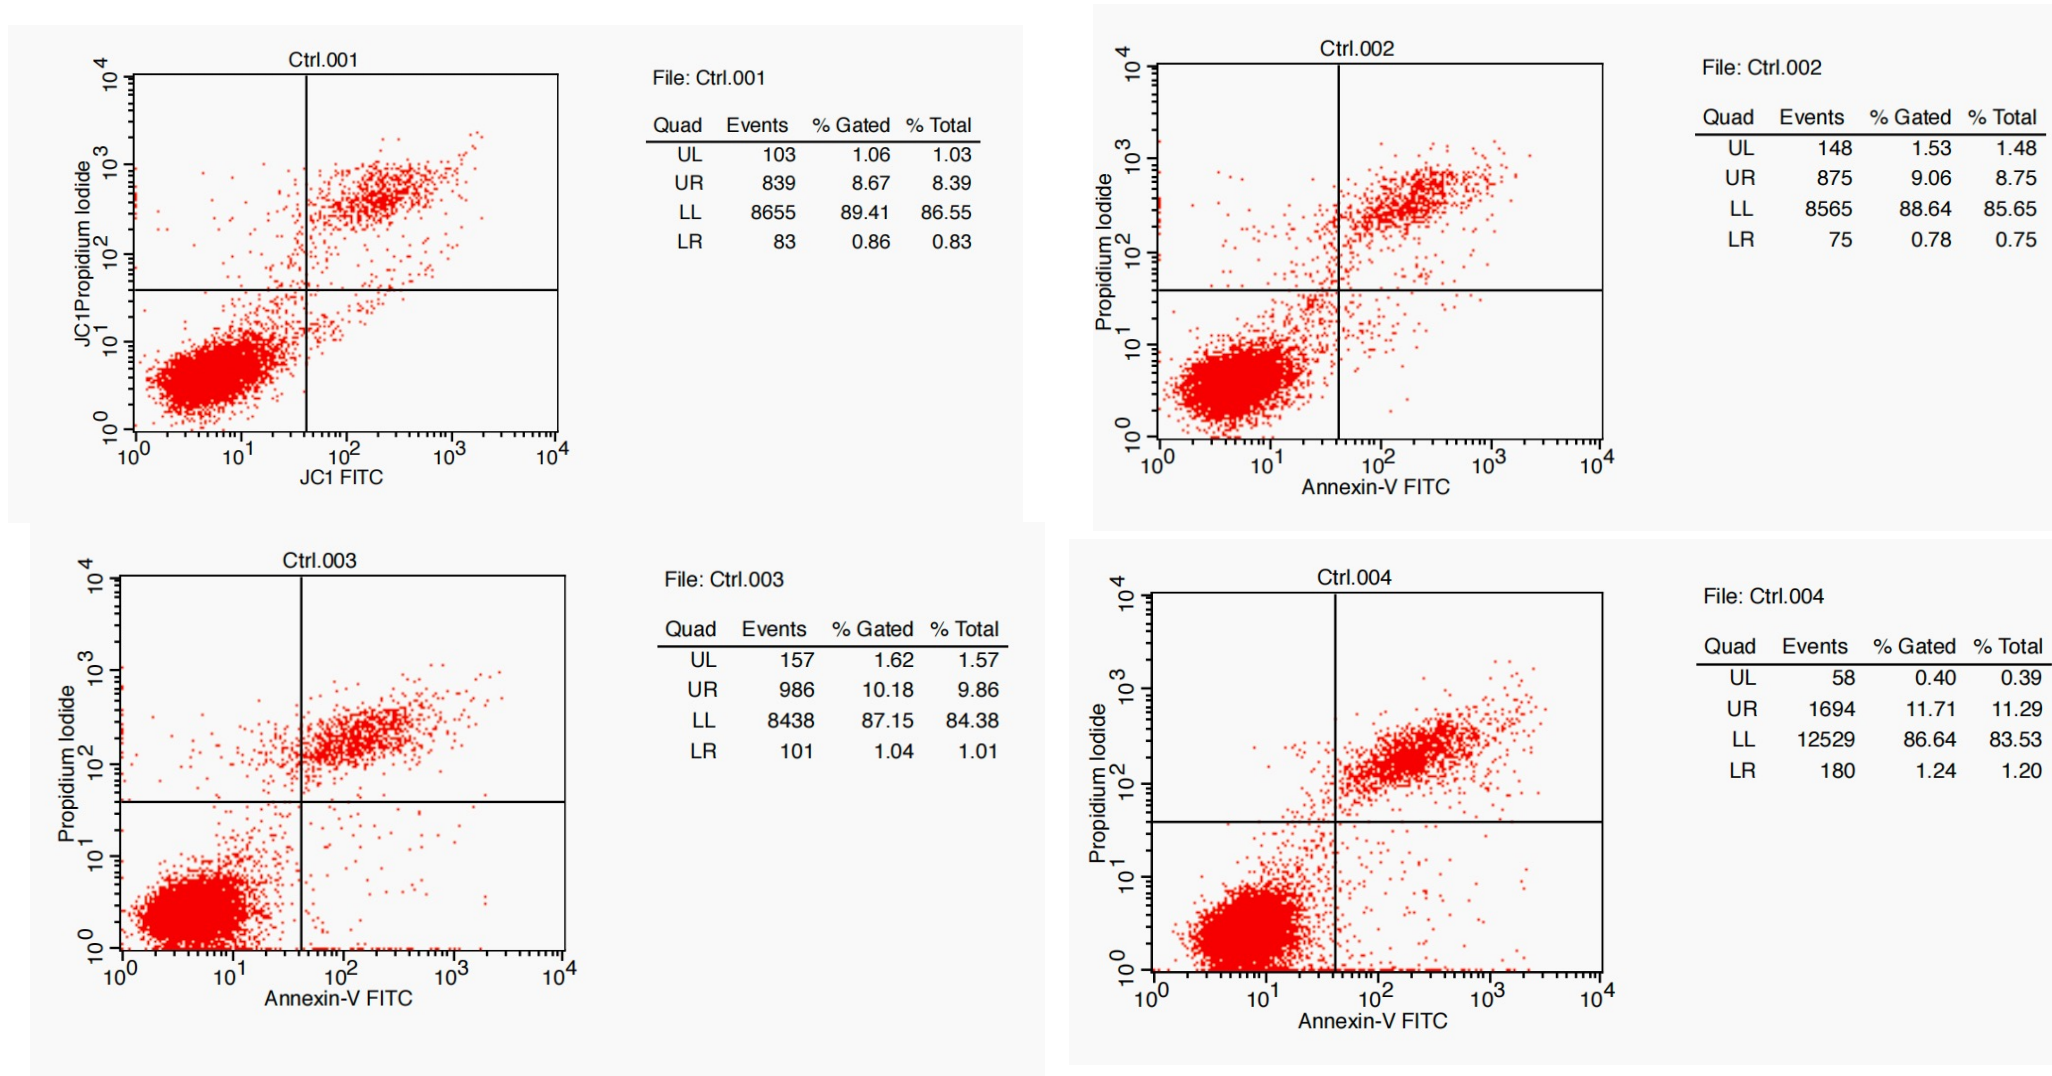

SGC-7901 Ctrl

**Figure 3A** Apoptosis of SGC-7901 cells was detected by Annexin V-FITC/PI double staining assay after 6h of treatments with BI, 5-FU alone, or their combination.

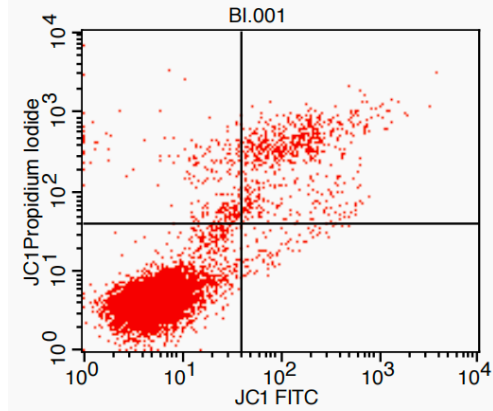

File: BI.001

| Quad | Events | % Gated | % Total |
|------|--------|---------|---------|
| UL   | 237    | 2.48    | 2.37    |
| UR   | 673    | 7.03    | 6.73    |
| LL   | 8588   | 89.71   | 85.88   |
| LR   | 75     | 0.78    | 0.75    |

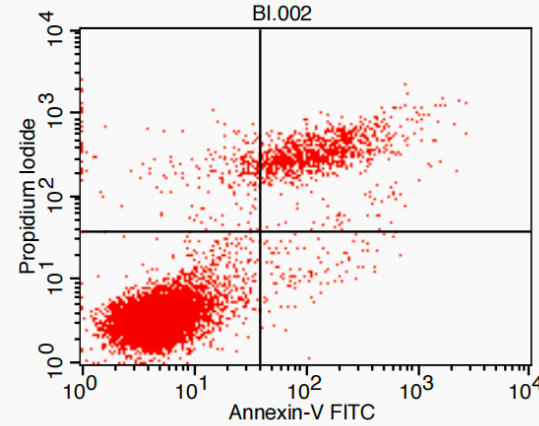

File: BI.002

| Quad | Events | % Gated | % Total |
|------|--------|---------|---------|
| UL   | 219    | 2.30    | 2.19    |
| UR   | 951    | 9.98    | 9.51    |
| LL   | 8264   | 86.73   | 82.64   |
| LR   | 94     | 0.99    | 0.94    |

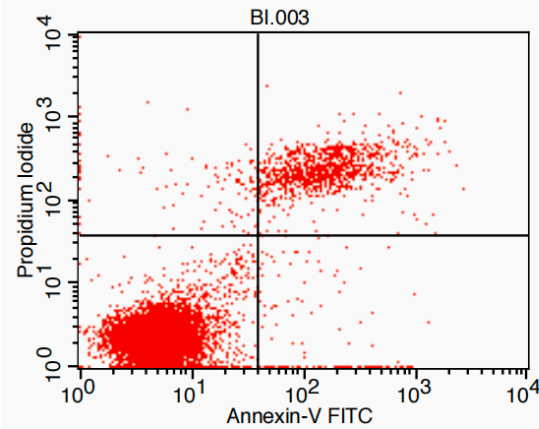

File: BI.003

| Quad | Events | % Gated | % Total |
|------|--------|---------|---------|
| UL   | 114    | 1.19    | 1.14    |
| UR   | 1027   | 10.75   | 10.27   |
| LL   | 8291   | 86.76   | 82.91   |
| LR   | 124    | 1.30    | 1.24    |

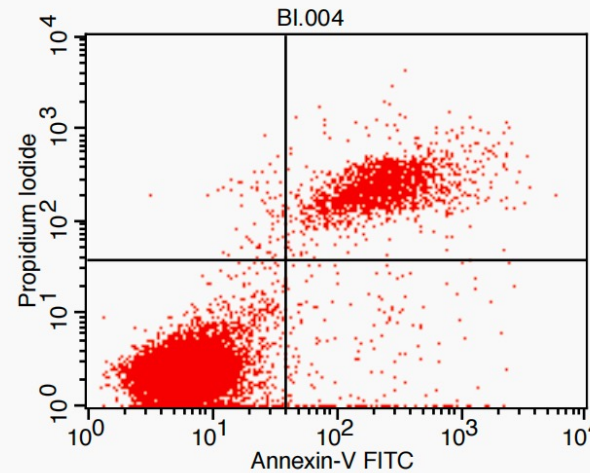

File: BI.004

| Quad | Events | % Gated | % Total |
|------|--------|---------|---------|
| UL   | 65     | 0.45    | 0.43    |
| UR   | 1809   | 12.66   | 12.06   |
| LL   | 12229  | 85.59   | 81.53   |
| LR   | 185    | 1.29    | 1.23    |

SGC-7901 BI

**Figure 3A** Apoptosis of SGC-7901 cells was detected by Annexin V-FITC/PI double staining assay after 6h of treatments with BI, 5-FU alone, or their combination.

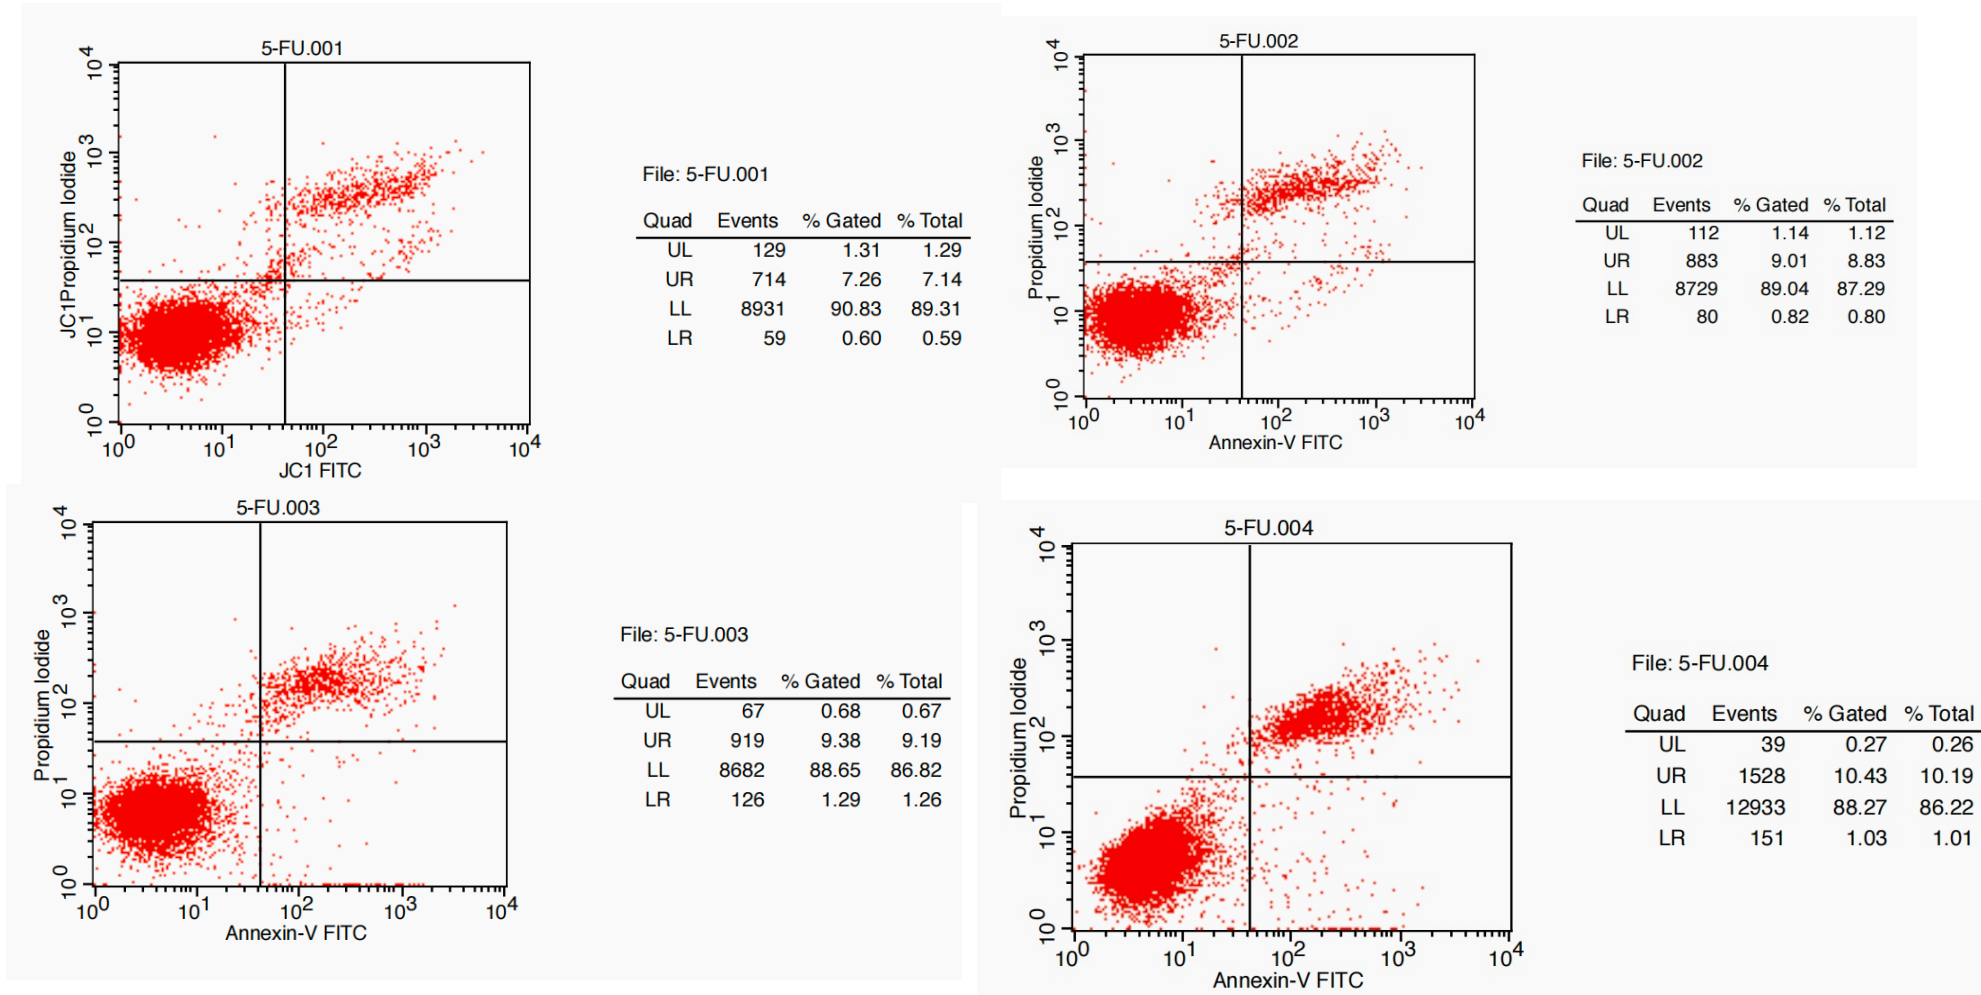

SGC-7901 5-FU

**Figure 3A** Apoptosis of SGC-7901 cells was detected by Annexin V-FITC/PI double staining assay after 6h of treatments with BI, 5-FU alone, or their combination.

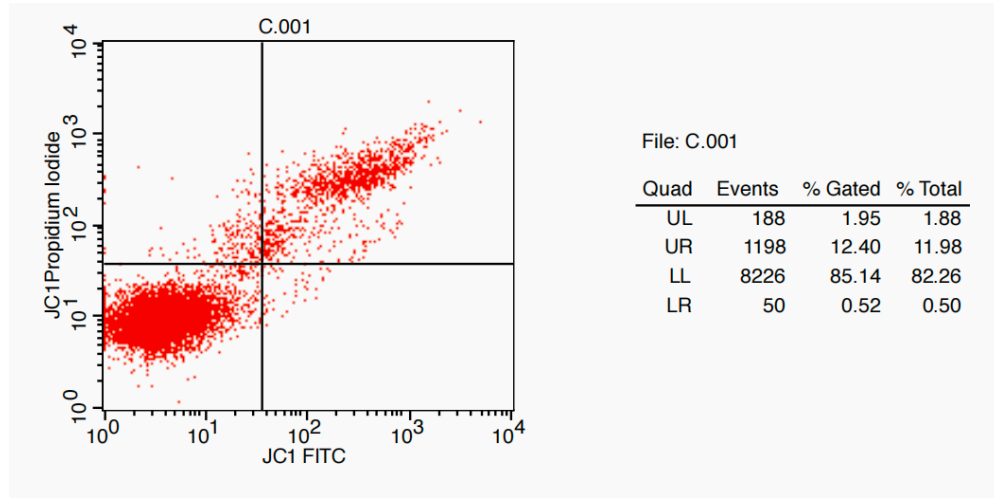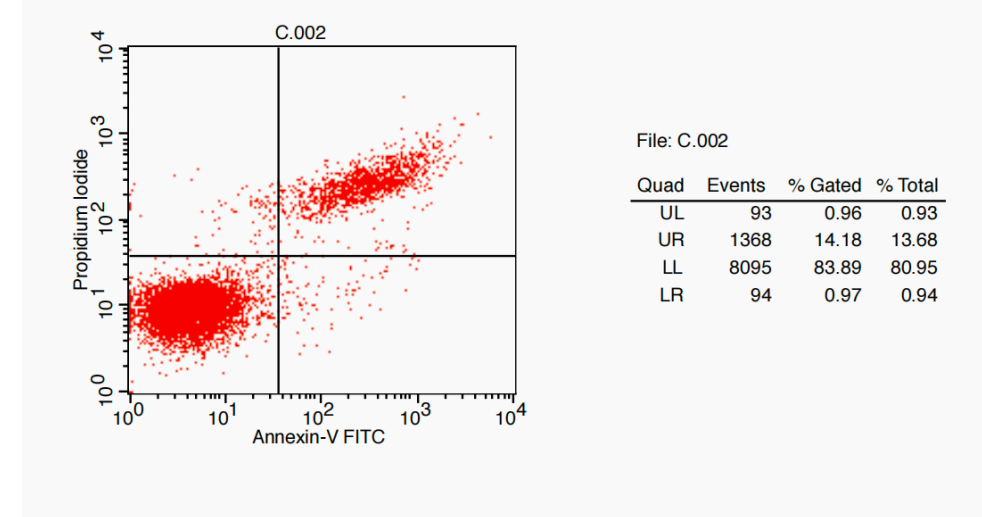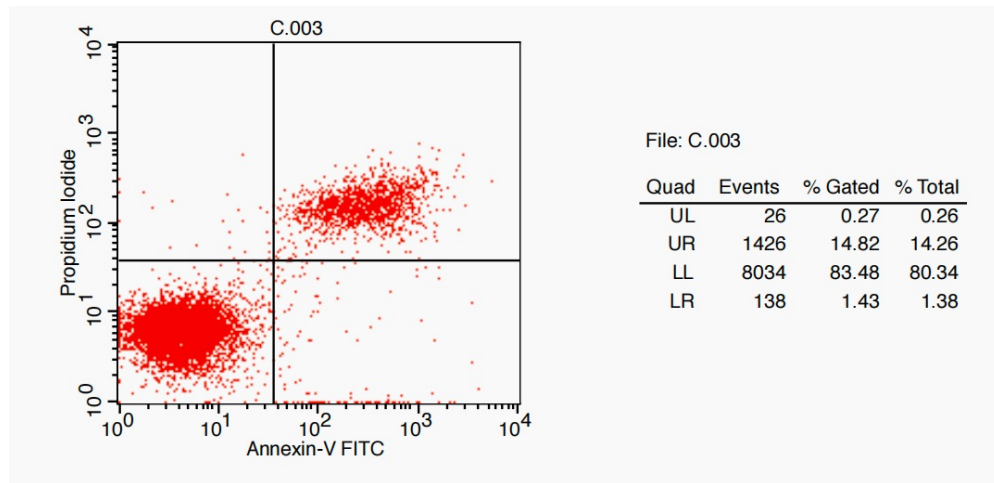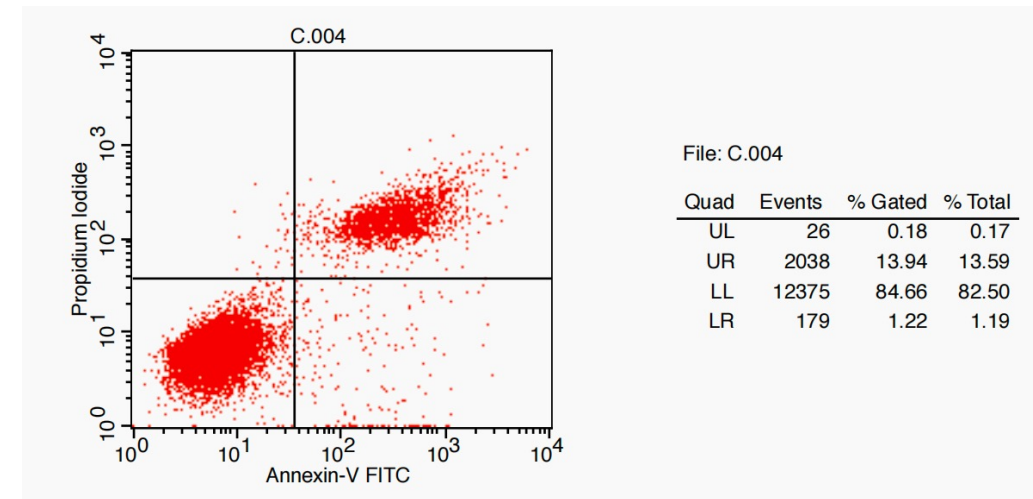

SGC-7901 BI+5-FU

**Figure 3A** Apoptosis of SGC-7901 cells was detected by Annexin V-FITC/PI double staining assay after 6h of treatments with BI, 5-FU alone, or their combination.

| 7901 | 6h    | 右下   | 右上    | 总     |
|------|-------|------|-------|-------|
|      | ctrl1 | 0.83 | 8.39  | 9.22  |
|      | ctrl2 | 0.75 | 8.75  | 9.5   |
|      | ctrl3 | 1.01 | 9.86  | 10.87 |
|      | ctrl4 | 1.2  | 11.29 | 12.49 |
|      | BI1   | 0.75 | 6.73  | 7.48  |
|      | BI2   | 0.94 | 9.51  | 10.45 |
|      | BI3   | 1.24 | 10.27 | 11.51 |
|      | BI4   | 1.23 | 12.06 | 13.29 |
|      | 5-FU1 | 0.59 | 7.14  | 7.73  |
|      | 5-FU2 | 0.8  | 8.83  | 9.63  |
|      | 5-FU3 | 1.26 | 9.19  | 10.45 |
|      | 5-FU4 | 1.01 | 10.19 | 11.2  |
|      | C1    | 0.58 | 11.98 | 12.56 |
|      | C2    | 0.94 | 13.68 | 14.62 |
|      | C3    | 1.38 | 14.26 | 15.64 |
|      | C4    | 1.19 | 13.59 | 14.78 |



**Figure 3B** Apoptosis of SGC-7901 cells was detected by Annexin V-FITC/PI double staining assay after 12h of treatments with BI, 5-FU alone, or their combination.

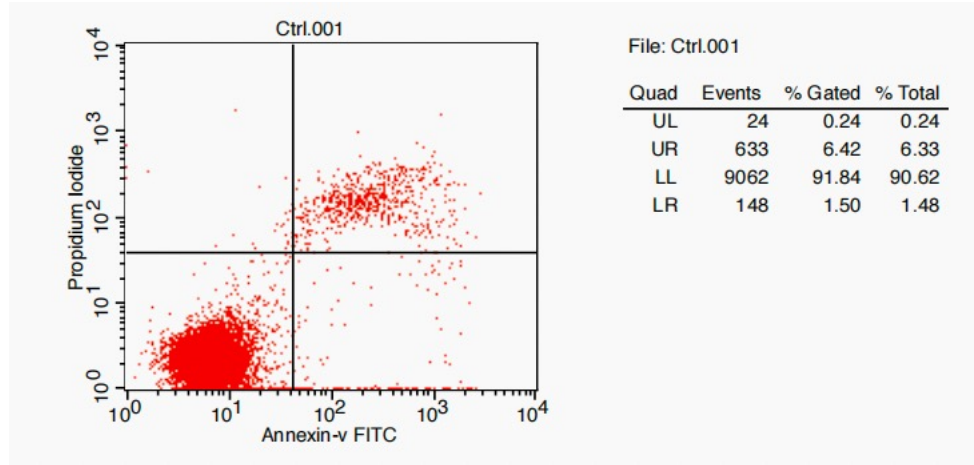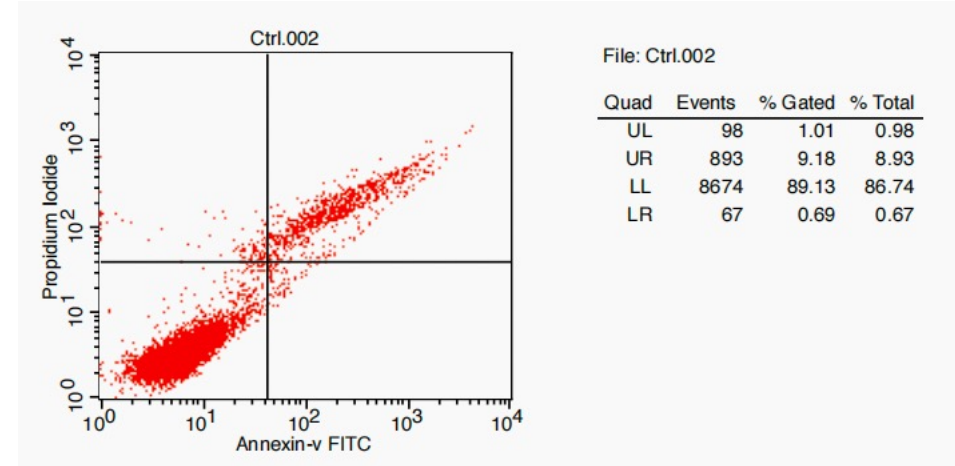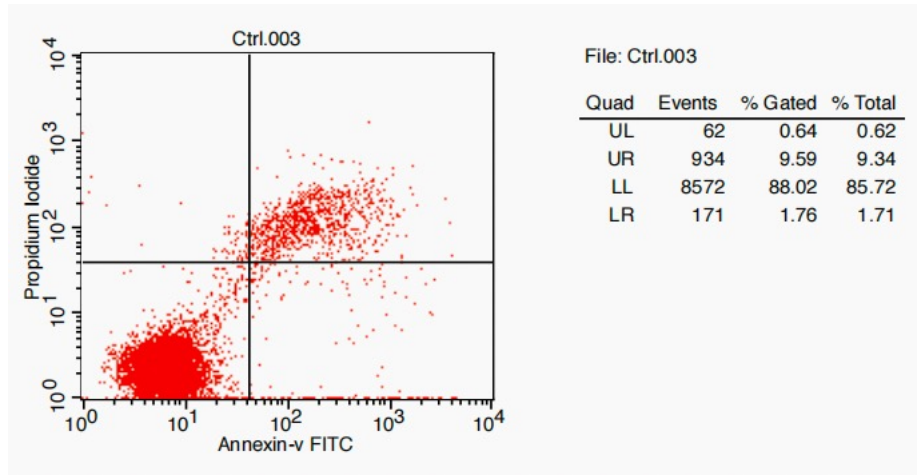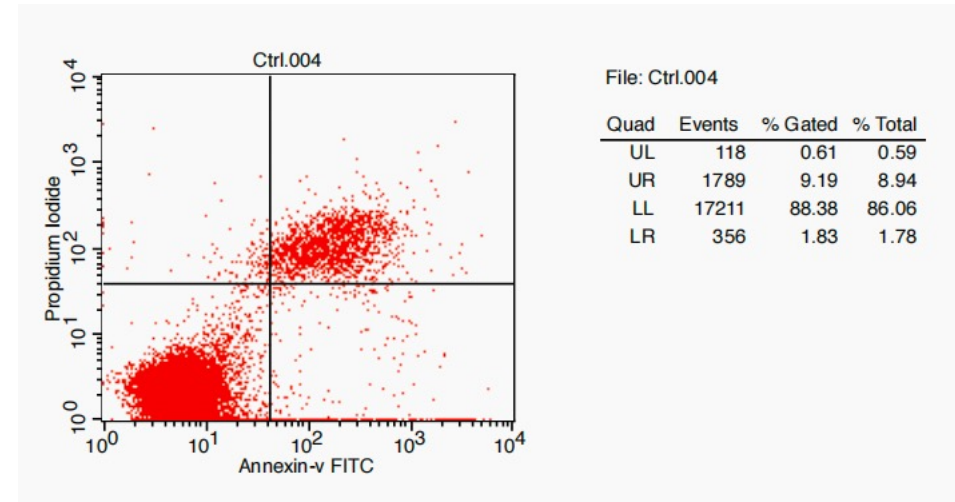

SGC-7901 Ctrl

**Figure 3B** Apoptosis of SGC-7901 cells was detected by Annexin V-FITC/PI double staining assay after 12h of treatments with BI, 5-FU alone, or their combination.

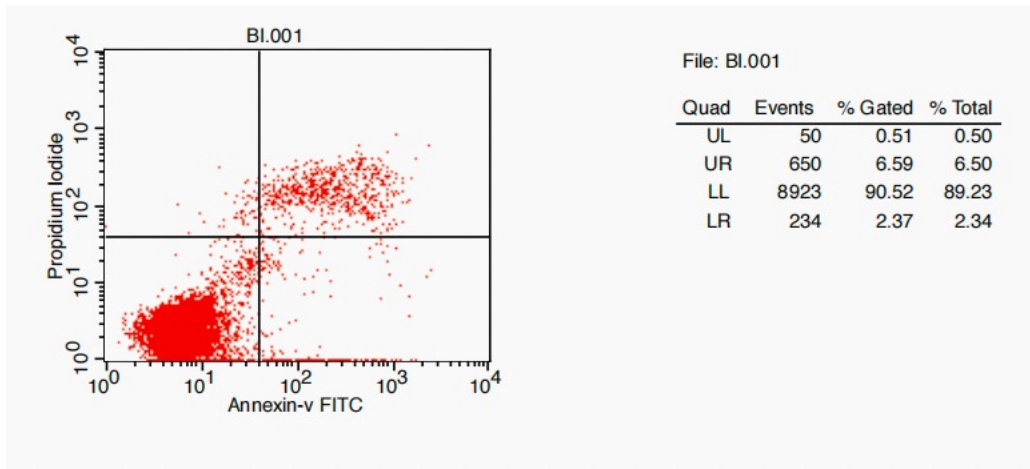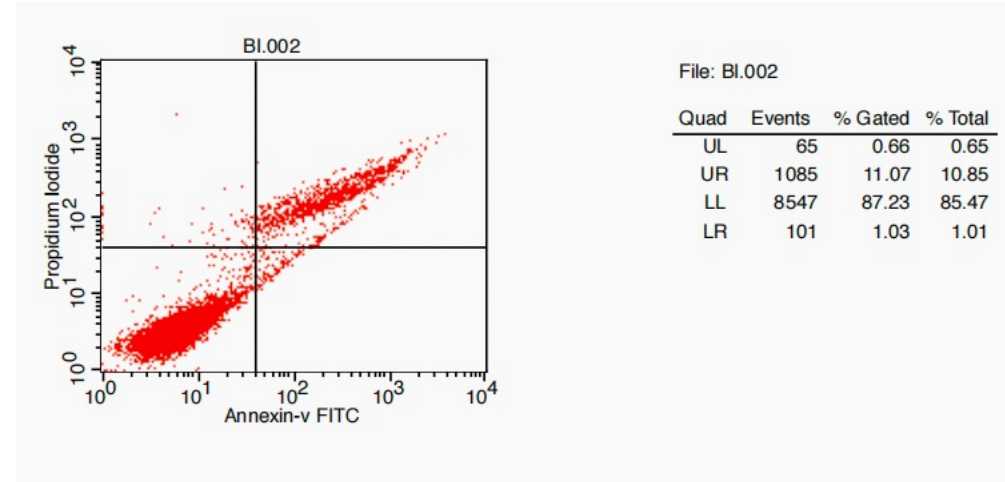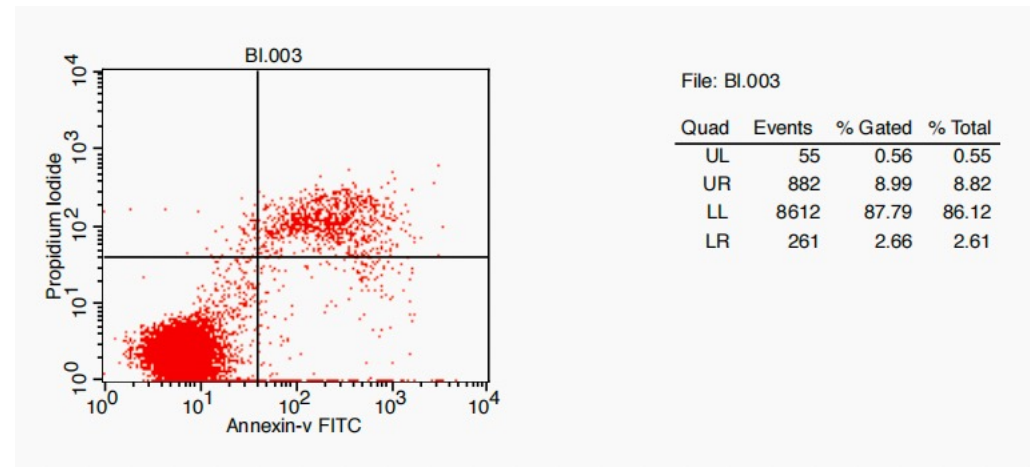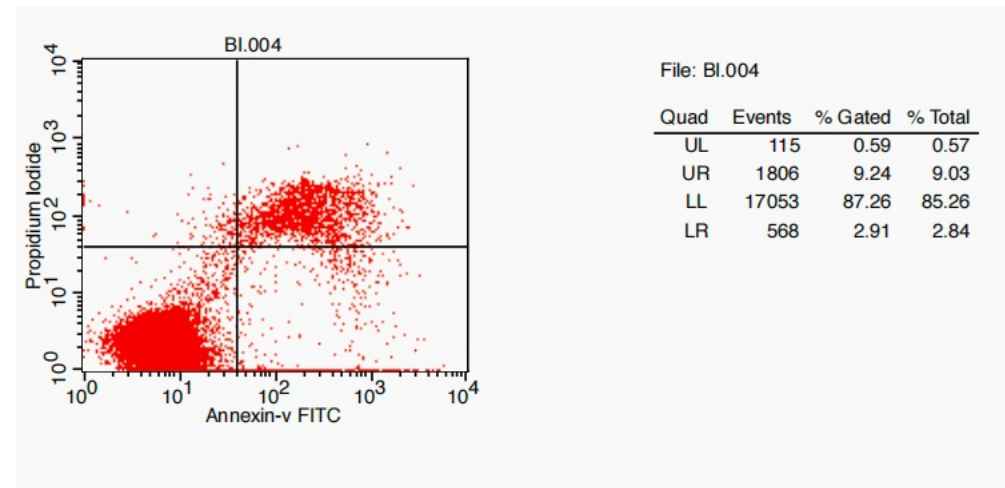

SGC-7901 BI

**Figure 3B** Apoptosis of SGC-7901 cells was detected by Annexin V-FITC/PI double staining assay after 12h of treatments with BI, 5-FU alone, or their combination.

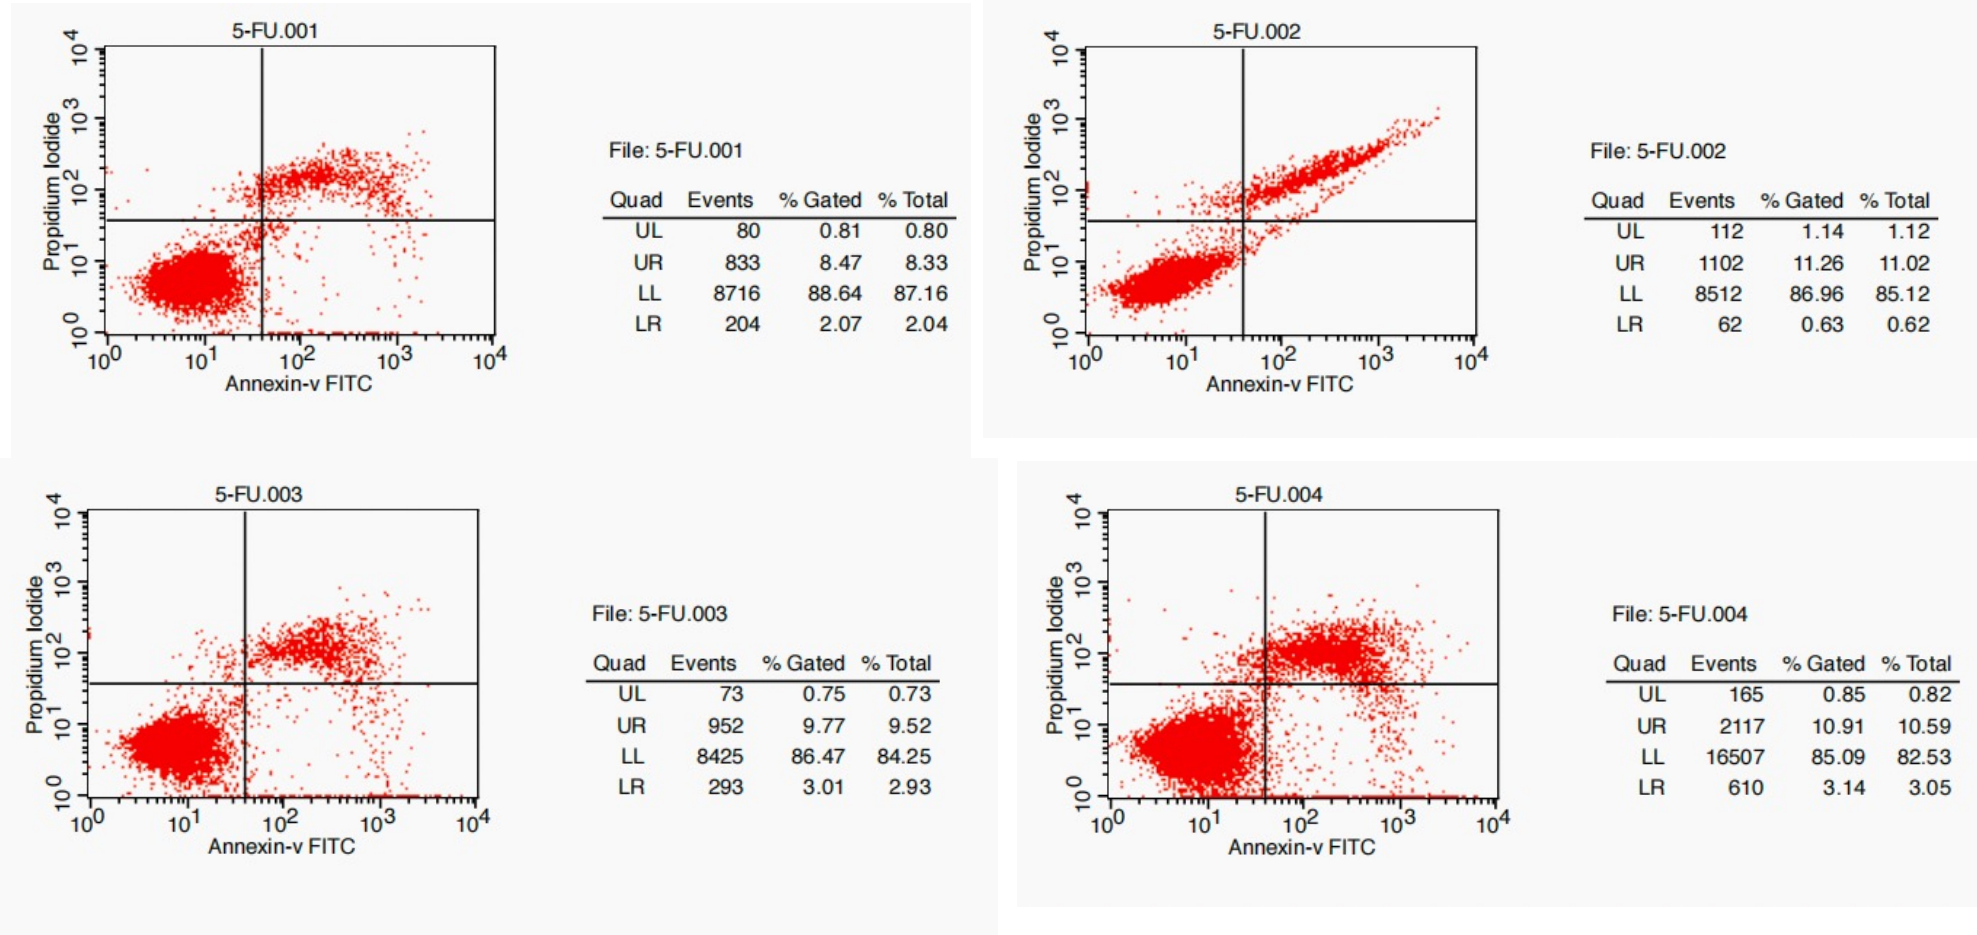

SGC-7901 5-FU

**Figure 3B** Apoptosis of SGC-7901 cells was detected by Annexin V-FITC/PI double staining assay after 12h of treatments with BI, 5-FU alone, or their combination.

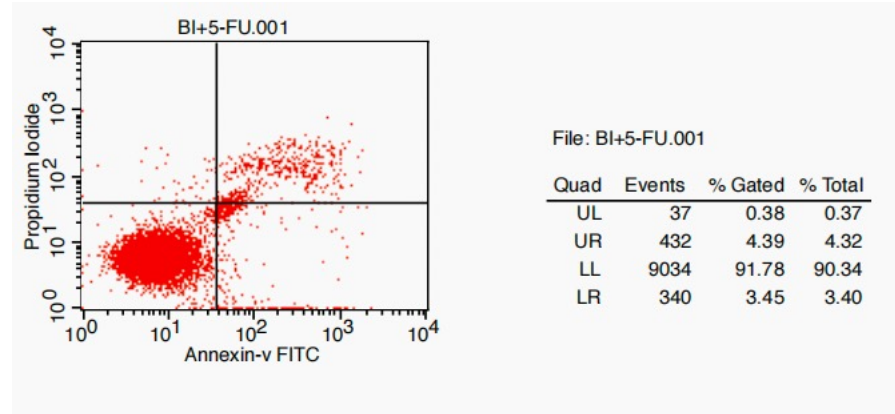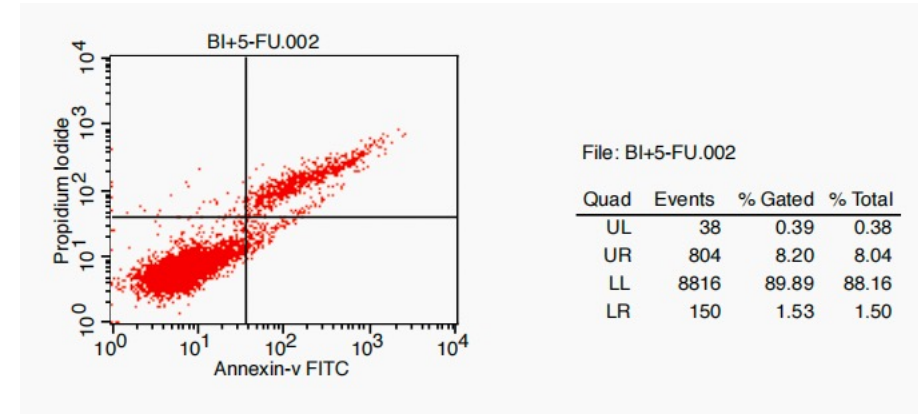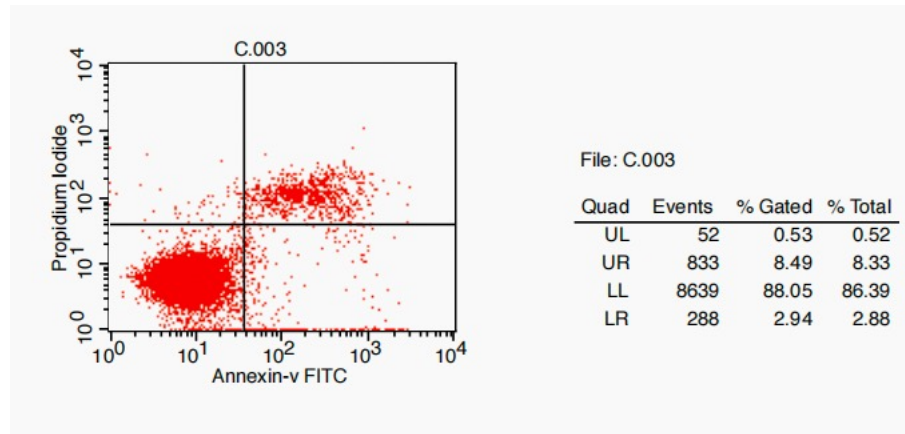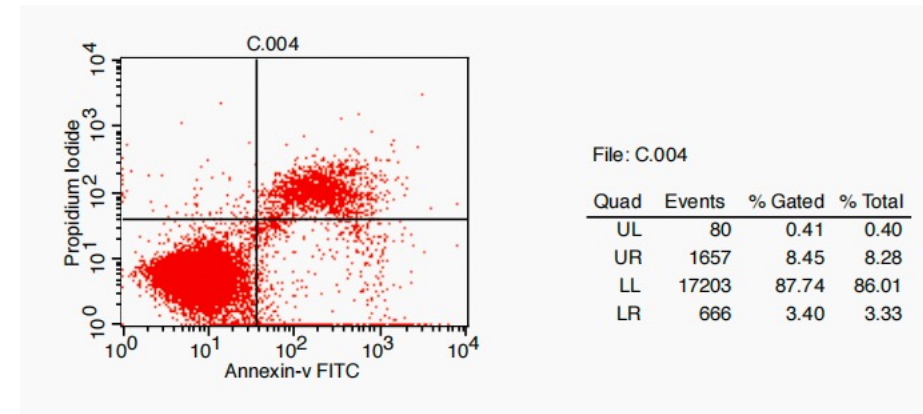

SGC-7901 BI+5-FU

**Figure 3B** Apoptosis of SGC-7901 cells was detected by Annexin V-FITC/PI double staining assay after 12h of treatments with BI, 5-FU alone, or their combination.

| 7901 | 12h   | 右下    | 右上   | 总     |
|------|-------|-------|------|-------|
|      | ctrl1 | 1.48  | 6.33 | 7.81  |
|      | ctrl2 | 8.93  | 0.67 | 9.6   |
|      | ctrl3 | 9.34  | 1.71 | 11.05 |
|      | ctrl4 | 8.94  | 1.78 | 10.72 |
|      | BI1   | 2.34  | 6.5  | 8.84  |
|      | BI2   | 10.85 | 1.01 | 11.86 |
|      | BI3   | 8.82  | 2.61 | 11.43 |
|      | BI4   | 9.03  | 2.84 | 11.87 |
|      | 5-FU1 | 2.04  | 8.33 | 10.37 |
|      | 5-FU2 | 11.02 | 0.62 | 11.64 |
|      | 5-FU3 | 9.52  | 2.93 | 12.45 |
|      | 5-FU4 | 10.59 | 3.05 | 13.64 |
|      | C1    | 3.4   | 4.32 | 7.72  |
|      | C2    | 8.04  | 1.5  | 9.54  |
|      | C3    | 8.33  | 2.88 | 11.21 |
|      | C4    | 8.28  | 3.33 | 11.61 |

**Figure 3C** Apoptosis of SGC-7901 cells was detected by Annexin V-FITC/PI double staining assay after 24h of treatments with BI, 5-FU alone, or their combination.

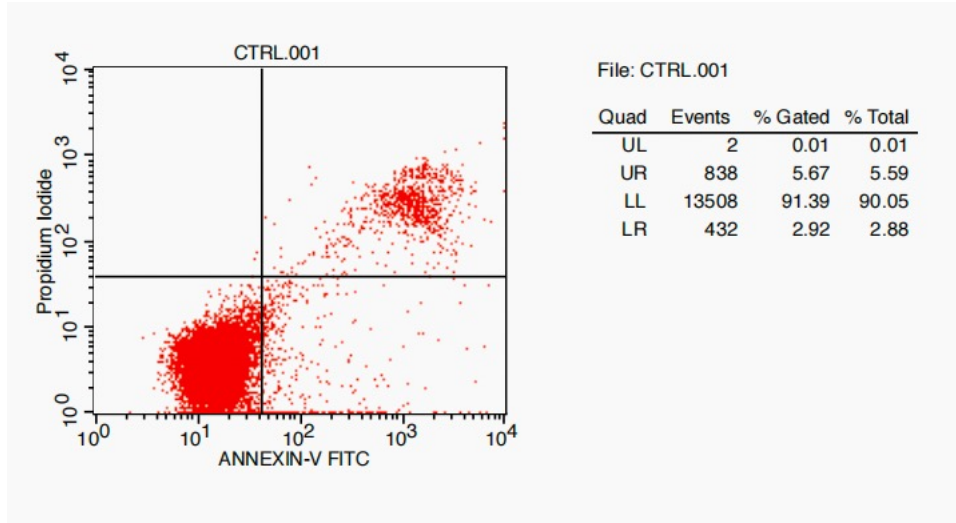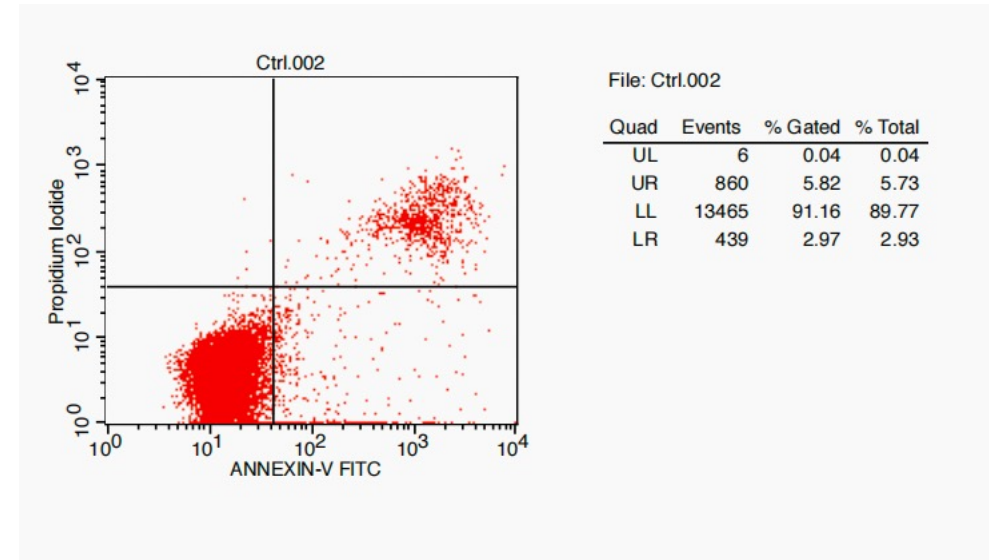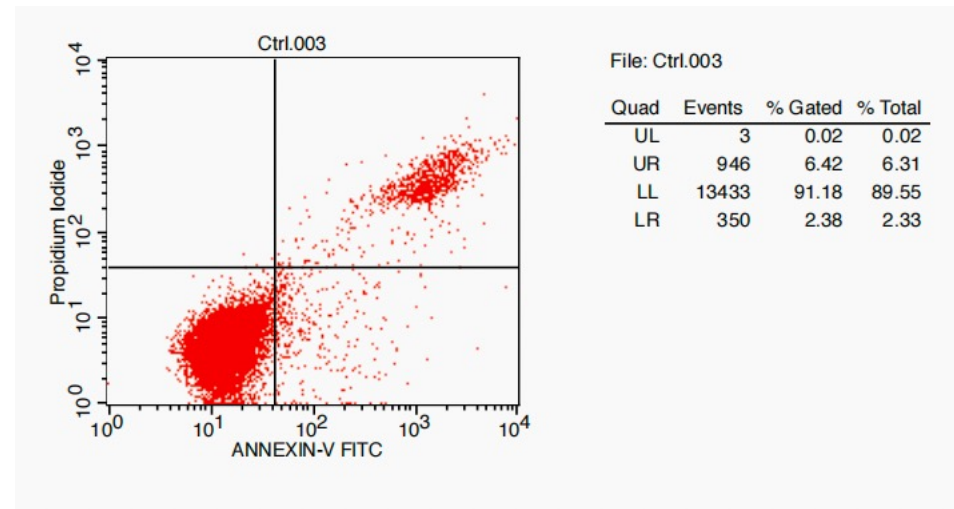

SGC-7901 Ctrl

**Figure 3C** Apoptosis of SGC-7901 cells was detected by Annexin V-FITC/PI double staining assay after 24h of treatments with BI, 5-FU alone, or their combination.

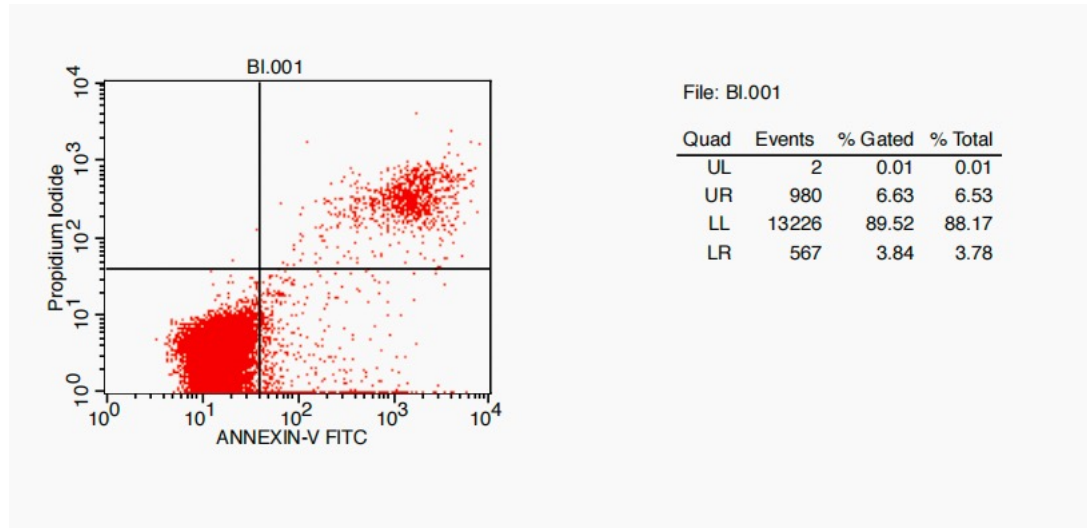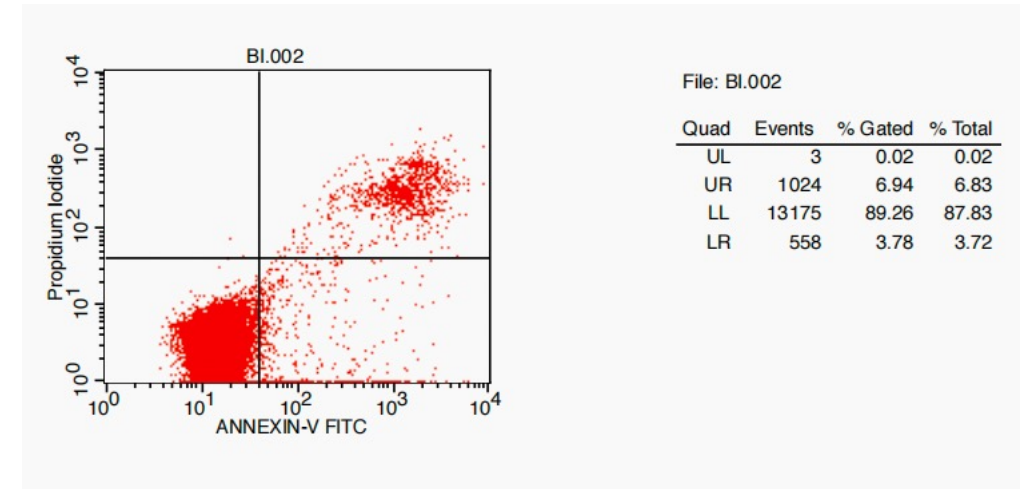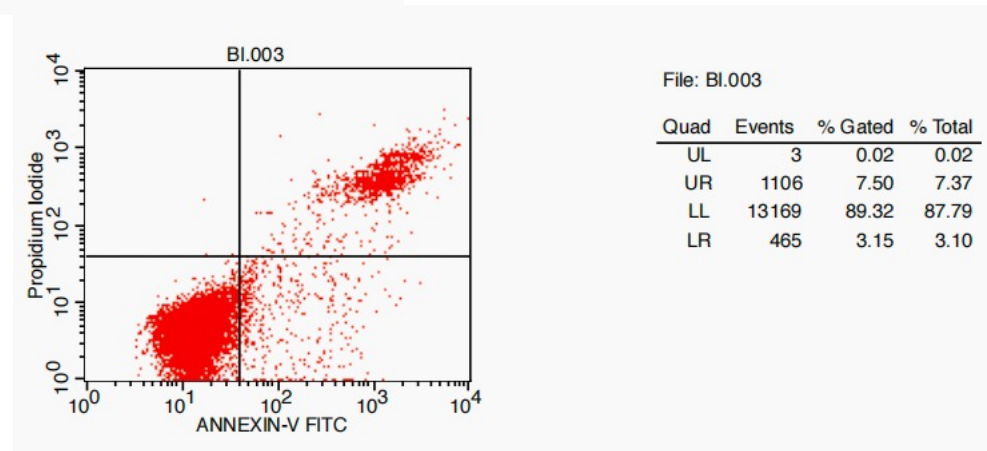

SGC-7901 BI

**Figure 3C** Apoptosis of SGC-7901 cells was detected by Annexin V-FITC/PI double staining assay after 24h of treatments with BI, 5-FU alone, or their combination.

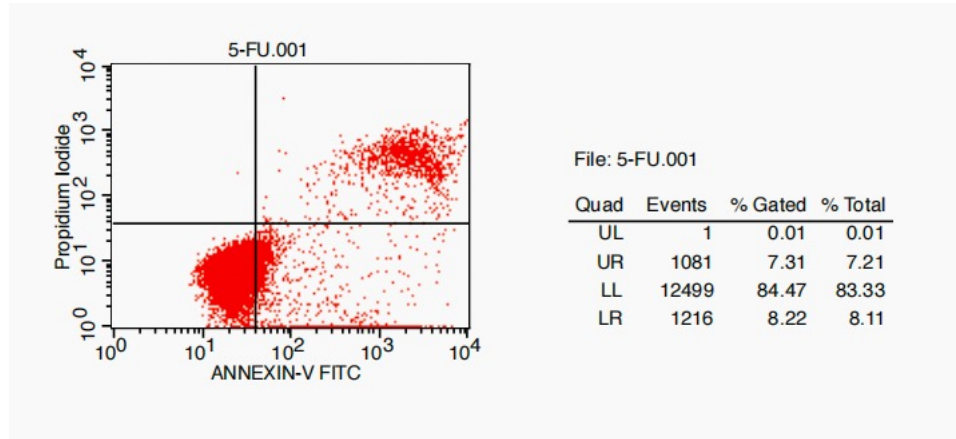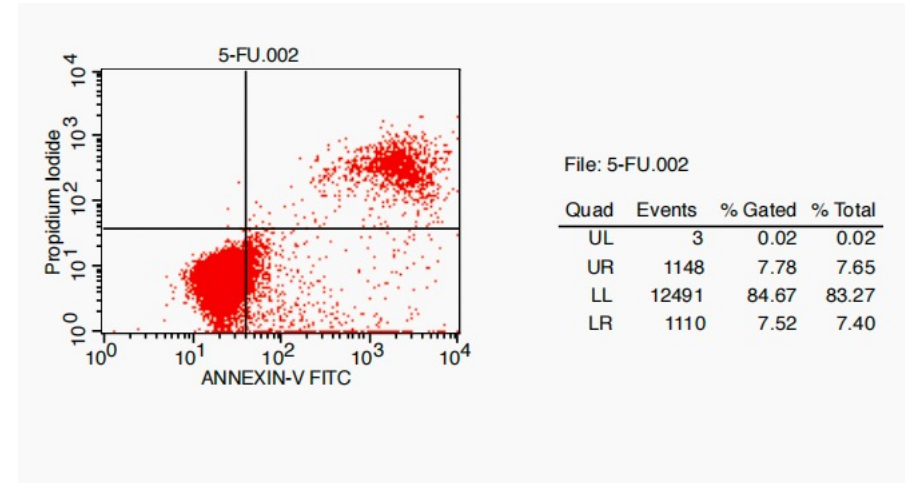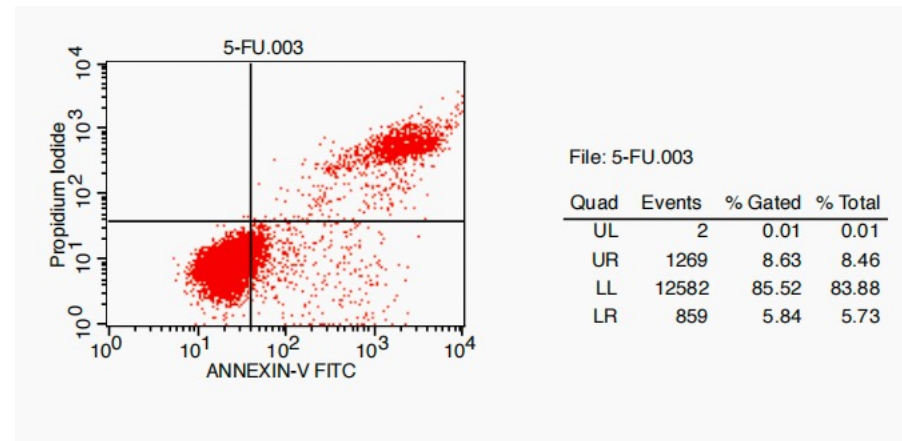

SGC-7901 5-FU



**Figure 3C** Apoptosis of SGC-7901 cells was detected by Annexin V-FITC/PI double staining assay after 24h of treatments with BI, 5-FU alone, or their combination.

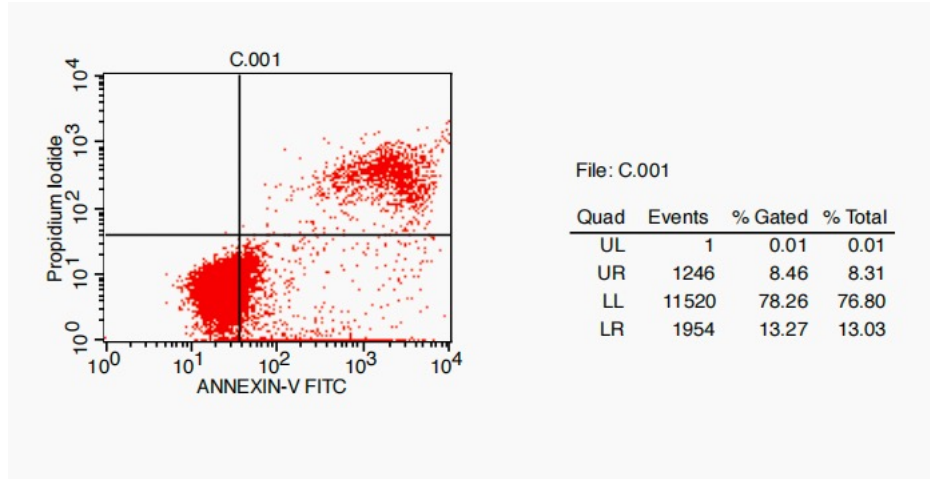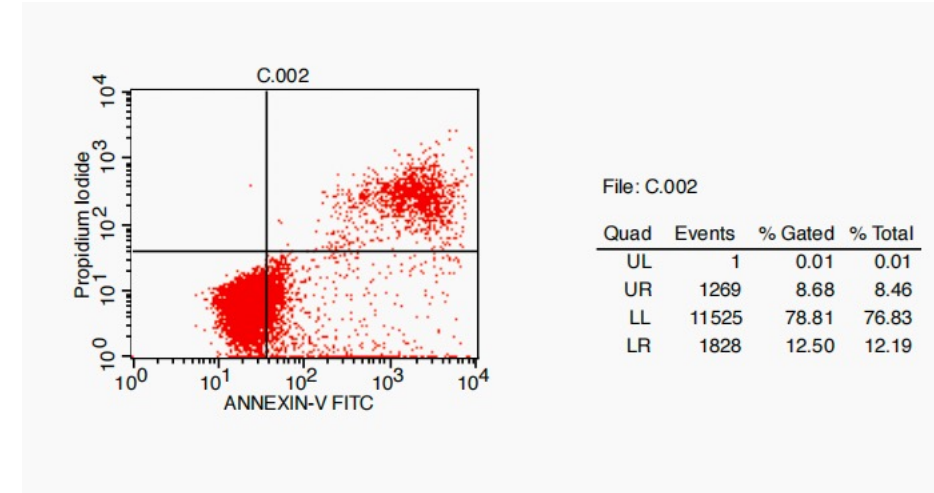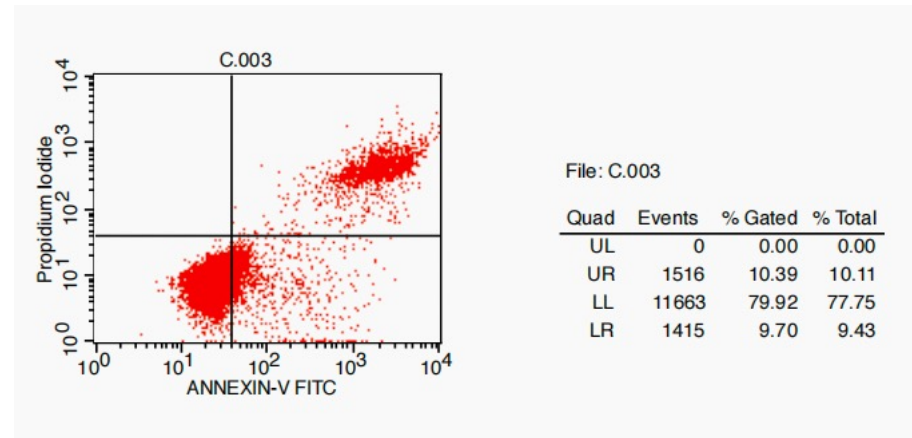

SGC-7901 BI+5-FU

**Figure 3C** Apoptosis of SGC-7901 cells was detected by Annexin V-FITC/PI double staining assay after 24h of treatments with BI, 5-FU alone, or their combination.

| 7901 | 24h   | 右下    | 右上    | 总     |
|------|-------|-------|-------|-------|
|      | ctrl1 | 2.88  | 5.59  | 8.47  |
|      | ctrl2 | 2.93  | 5.73  | 8.66  |
|      | ctrl3 | 2.33  | 6.31  | 8.64  |
|      | ctrl4 |       |       | 0     |
|      | BI1   | 3.78  | 6.53  | 10.31 |
|      | BI2   | 3.72  | 6.83  | 10.55 |
|      | BI3   | 3.1   | 7.37  | 10.47 |
|      | BI4   |       |       | 0     |
|      | 5-FU1 | 8.11  | 7.21  | 15.32 |
|      | 5-FU2 | 7.4   | 7.65  | 15.05 |
|      | 5-FU3 | 5.73  | 8.46  | 14.19 |
|      | 5-FU4 |       |       | 0     |
|      | C1    | 13.03 | 8.31  | 21.34 |
|      | C2    | 12.19 | 8.46  | 20.65 |
|      | C3    | 9.43  | 10.11 | 19.54 |
|      | C4    |       |       | 0     |

**Figure 3D** The changes of mitochondrial membrane potential (MMP) in SGC-7901 cells were detected by RH-123 staining after treatment with BI, 5-FU alone or their combination for 6 h

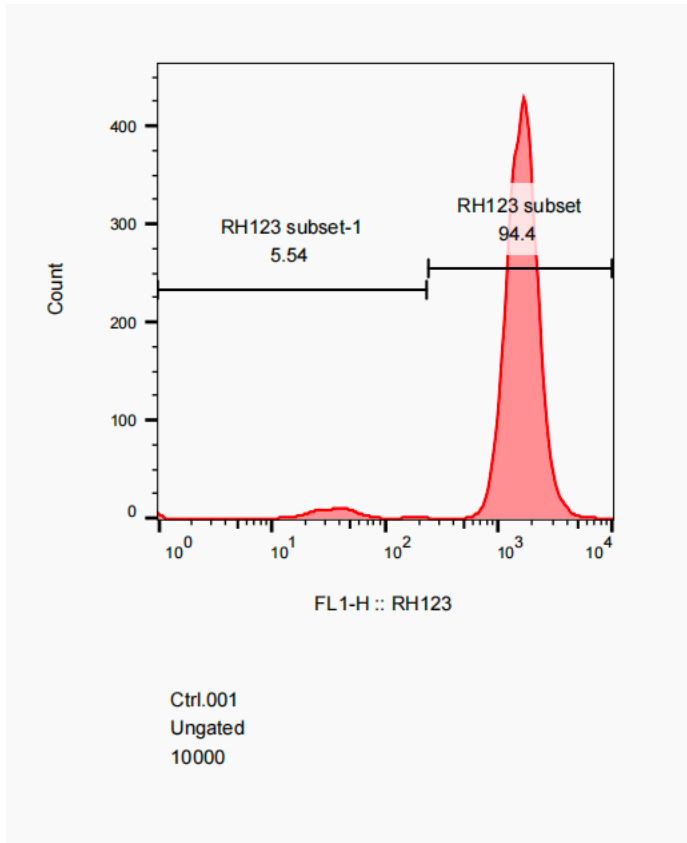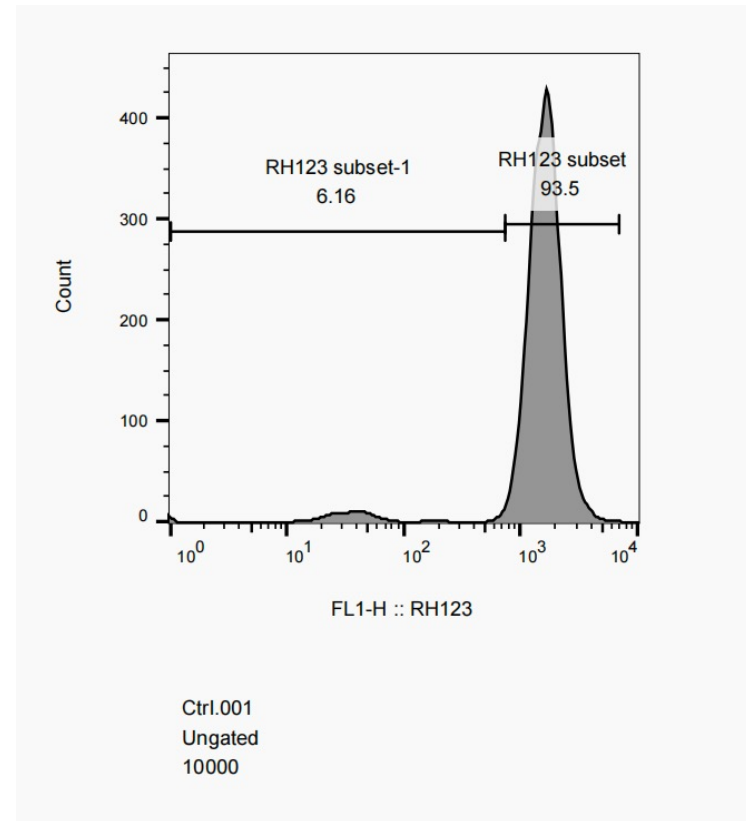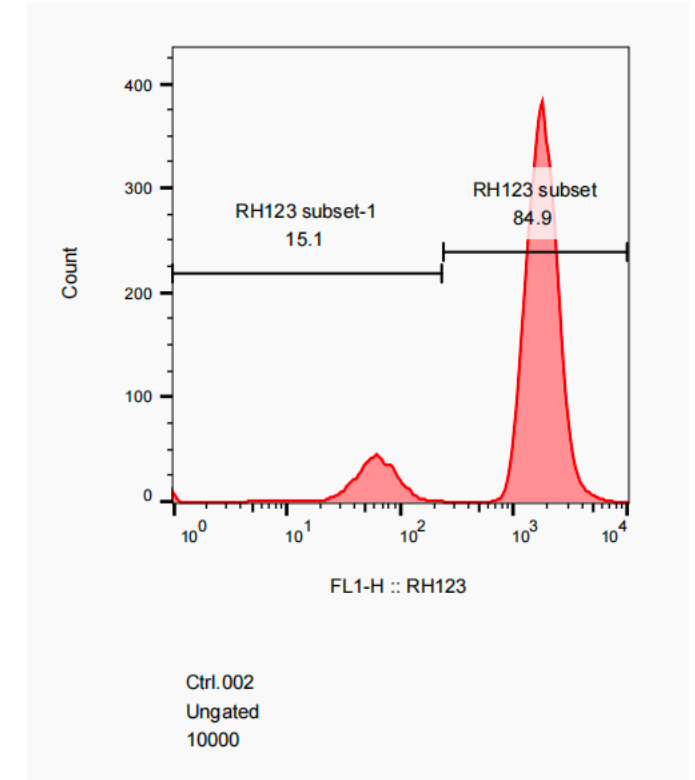

SGC-7901 Ctrl

**Figure 3D** The changes of mitochondrial membrane potential (MMP) in SGC-7901 cells were detected by RH-123 staining after treatment with BI, 5-FU alone or their combination for 6 h

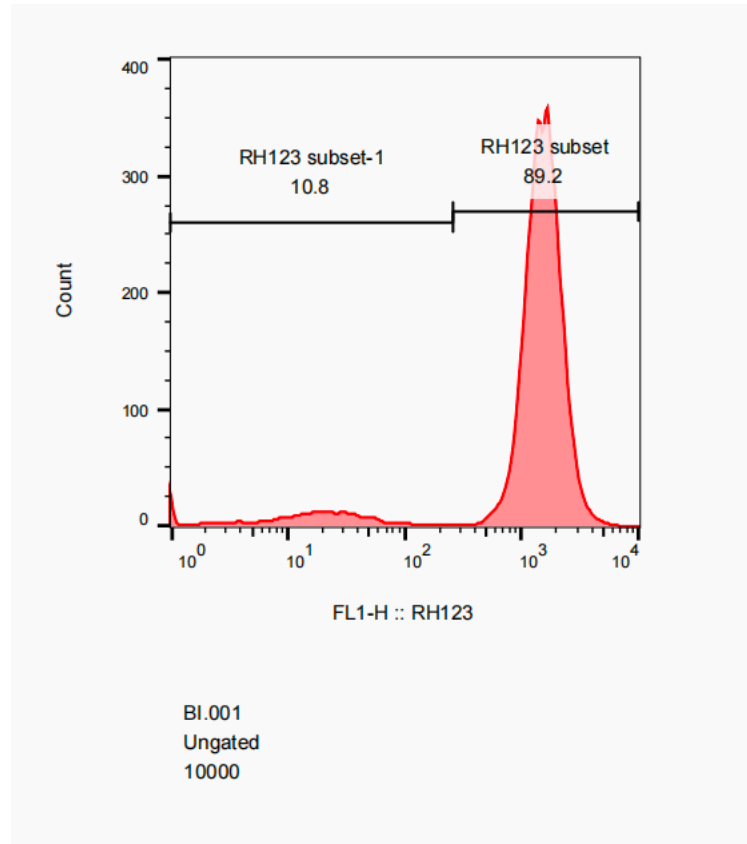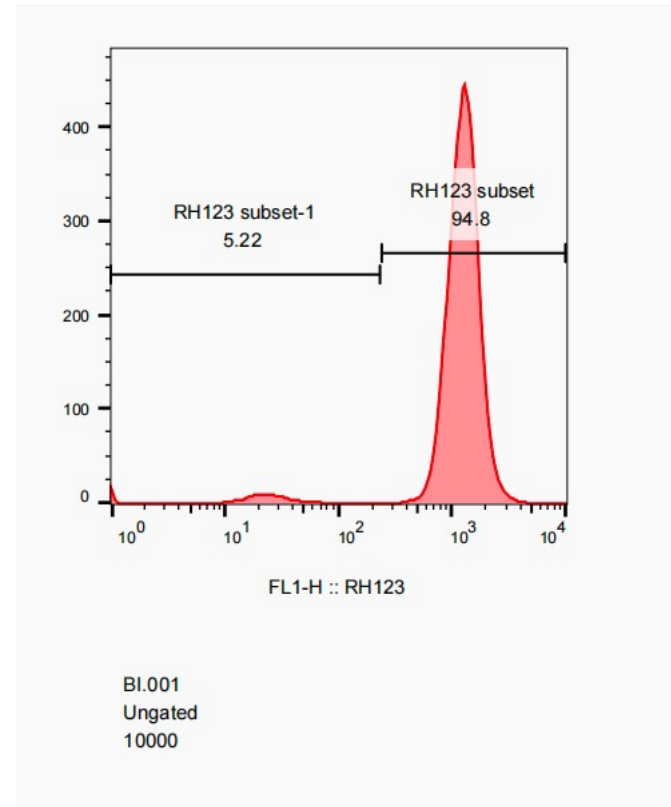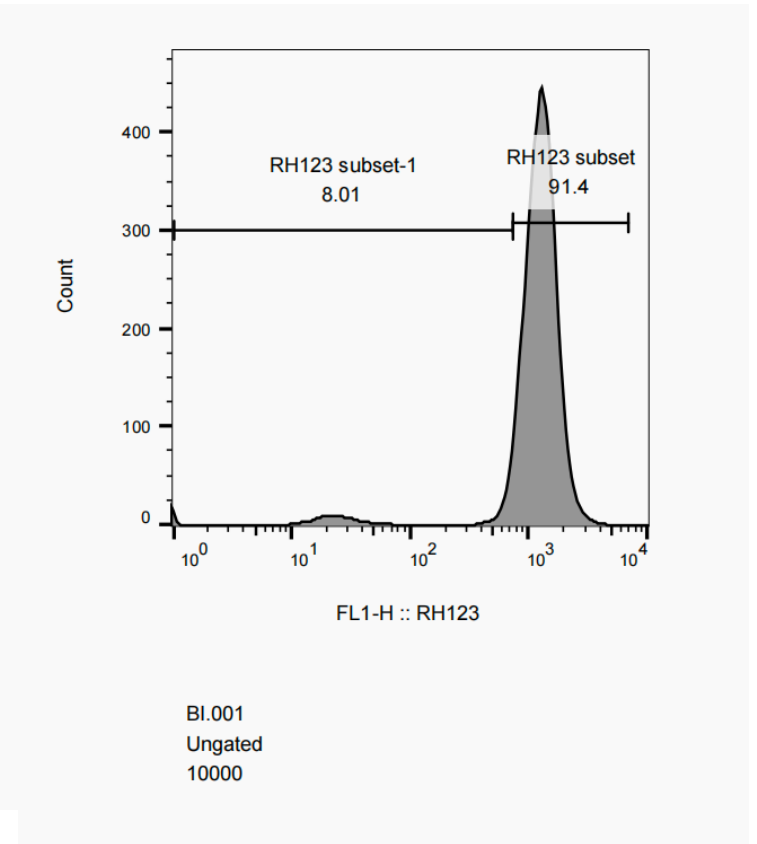

SGC-7901 BI

**Figure 3D** The changes of mitochondrial membrane potential (MMP) in SGC-7901 cells were detected by RH-123 staining after treatment with BI, 5-FU alone or their combination for 6 h

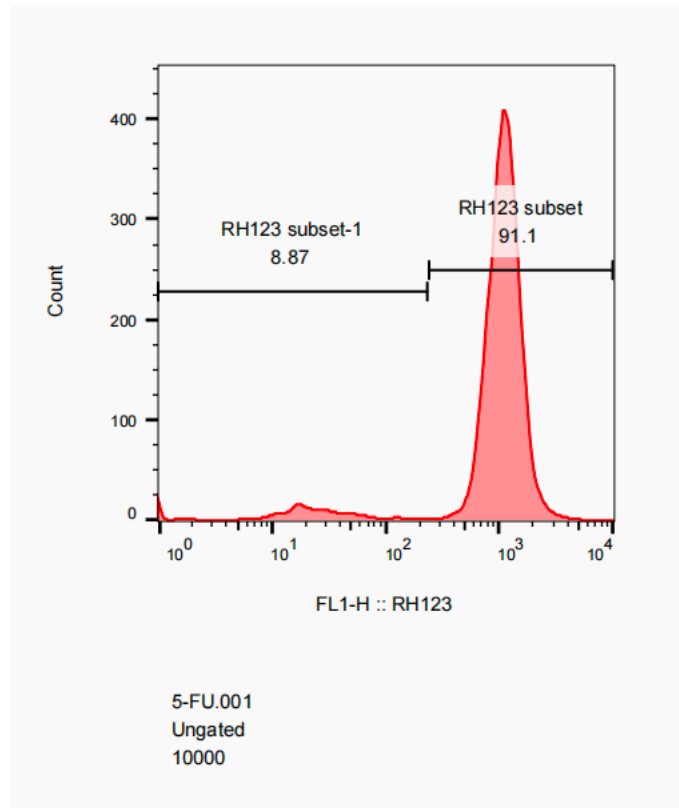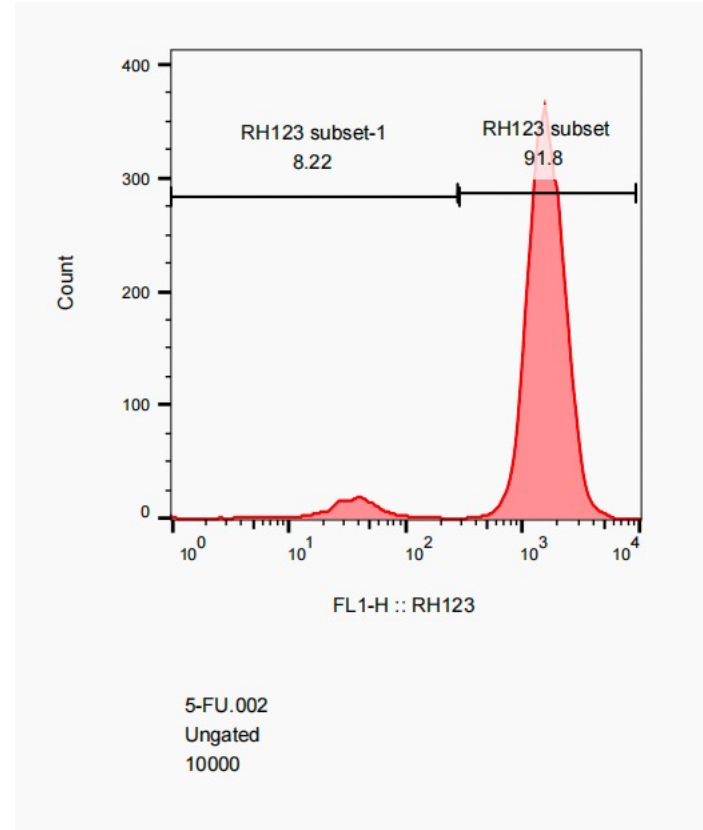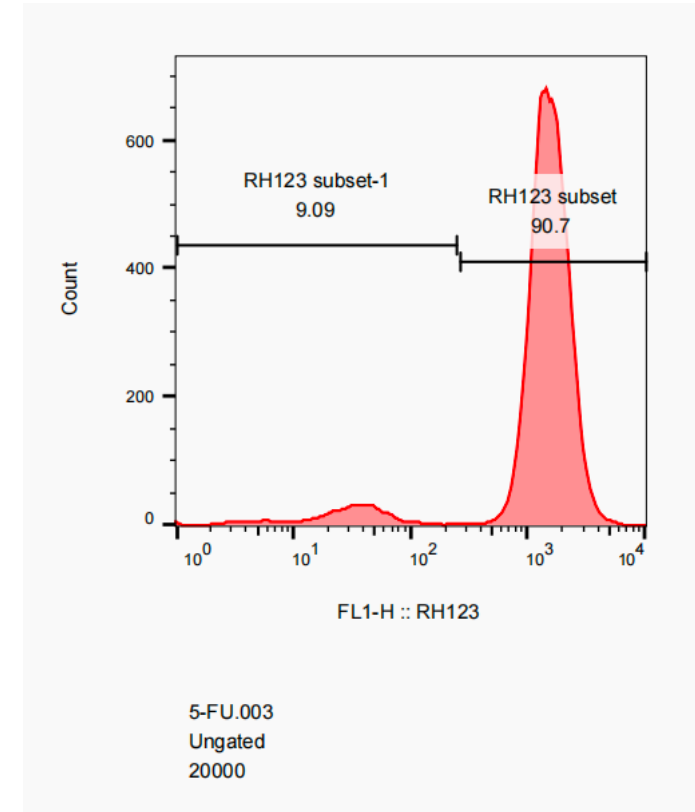

SGC-7901 5-FU

**Figure 3D** The changes of mitochondrial membrane potential (MMP) in SGC-7901 cells were detected by RH-123 staining after treatment with BI, 5-FU alone or their combination for 6 h

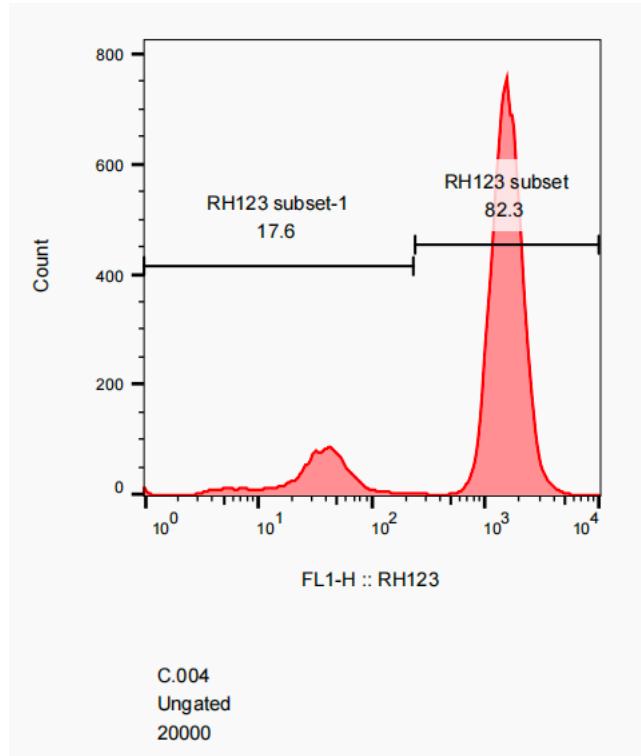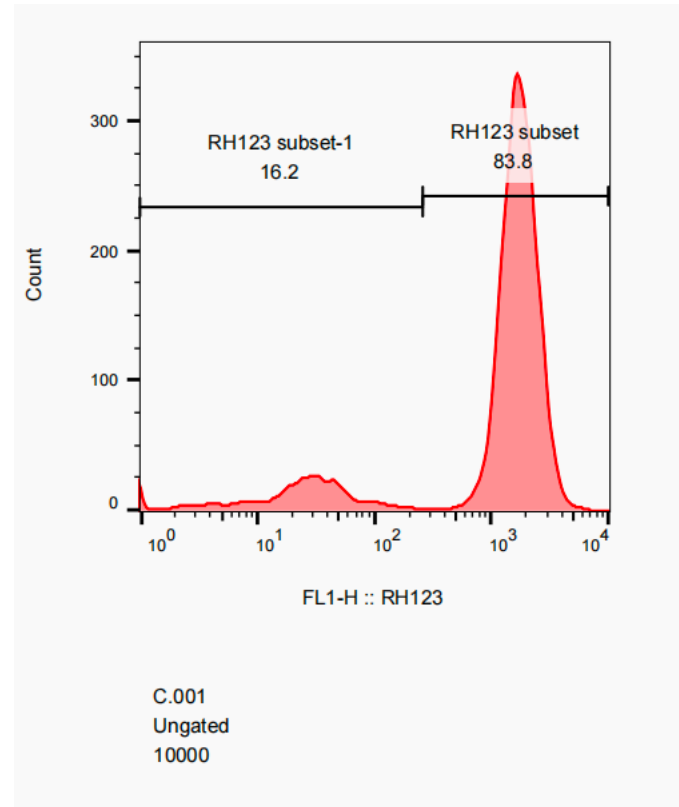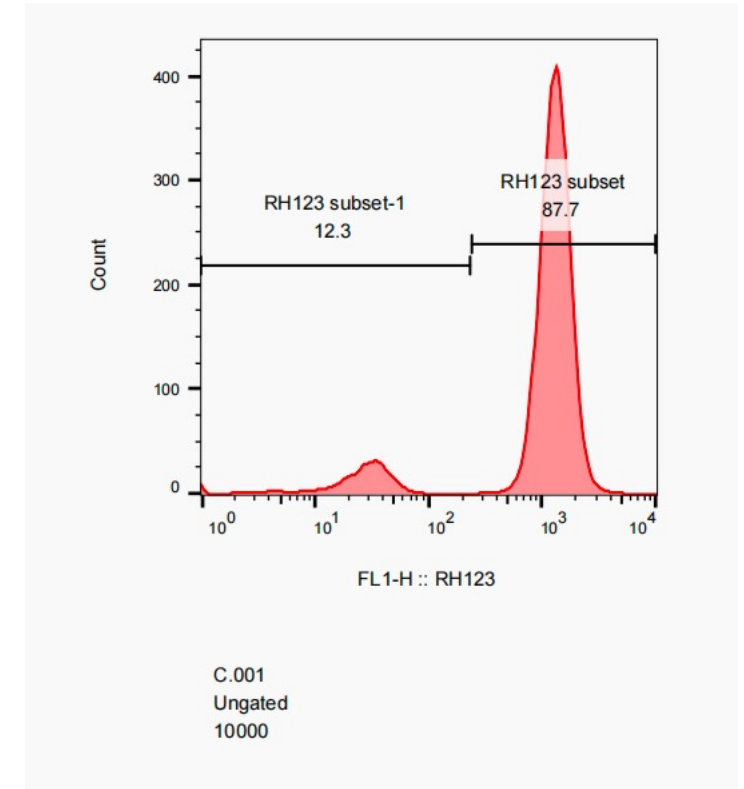

SGC-7901 BI+5-FU

**Figure 3D** The changes of mitochondrial membrane potential (MMP) in SGC-7901 cells were detected by RH-123 staining after treatment with BI, 5-FU alone or their combination for 6 h

| ctrl | BI   | 5-FU | BI+5-FU |
|------|------|------|---------|
| 93.5 | 91.4 | 91.8 | 83.8    |
| 94.4 | 94.8 | 91.1 | 87.8    |
| 84.9 | 89.2 | 90.7 | 82.3    |

**Figure 3E** The changes of mitochondrial membrane potential (MMP) in SGC-7901 cells were detected by RH-123 staining after treatment with BI, 5-FU alone or their combination for 12 h

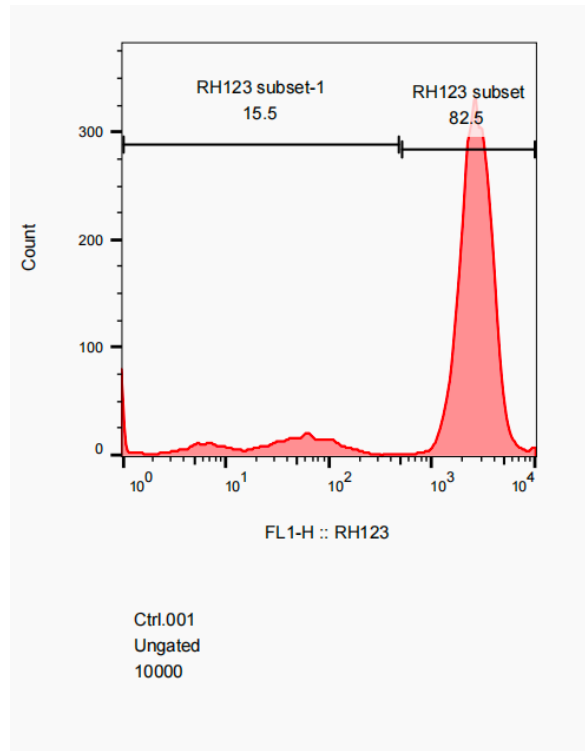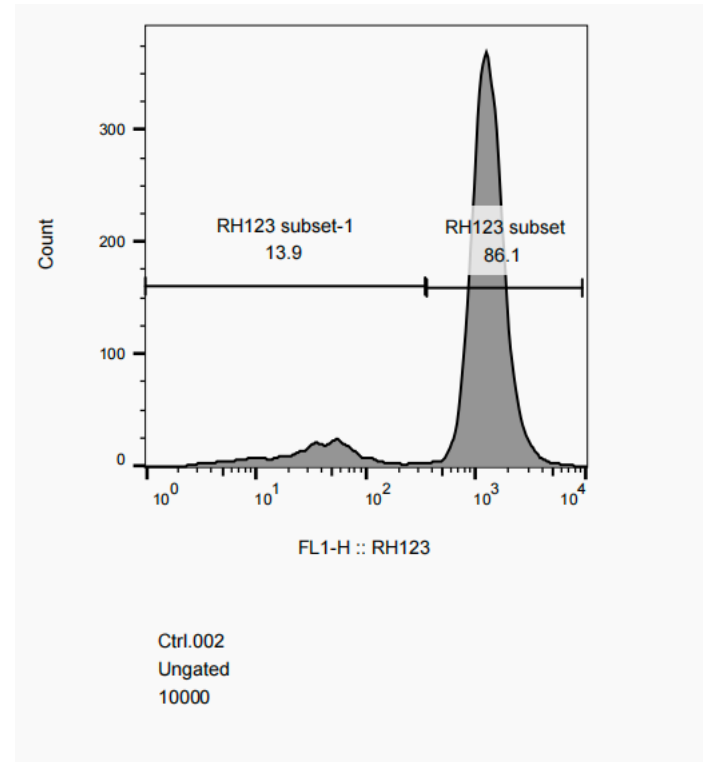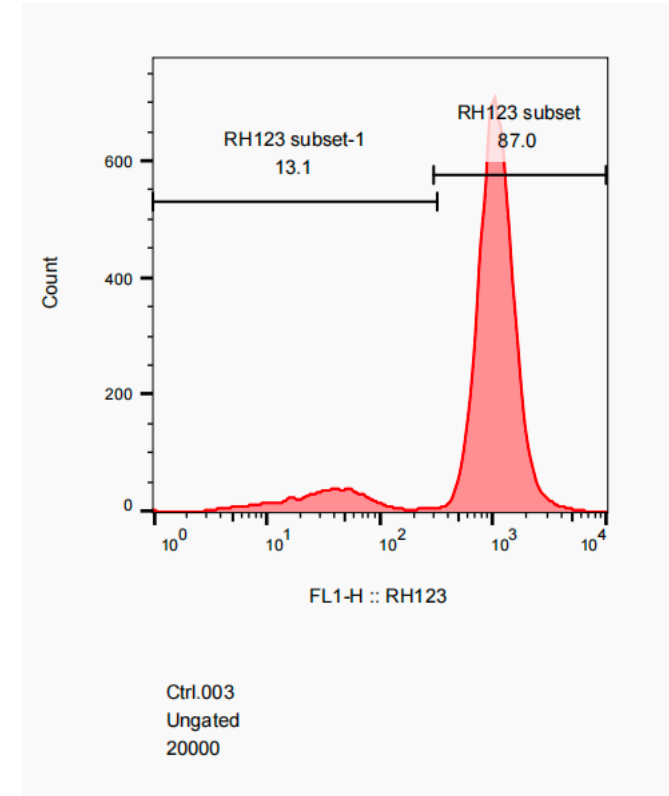

SGC-7901 Ctrl



**Figure 3E** The changes of mitochondrial membrane potential (MMP) in SGC-7901 cells were detected by RH-123 staining after treatment with BI, 5-FU alone or their combination for 12 h

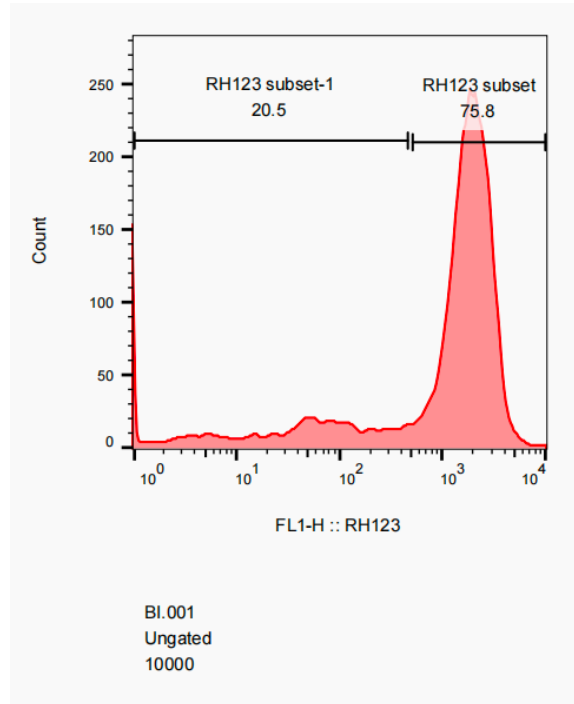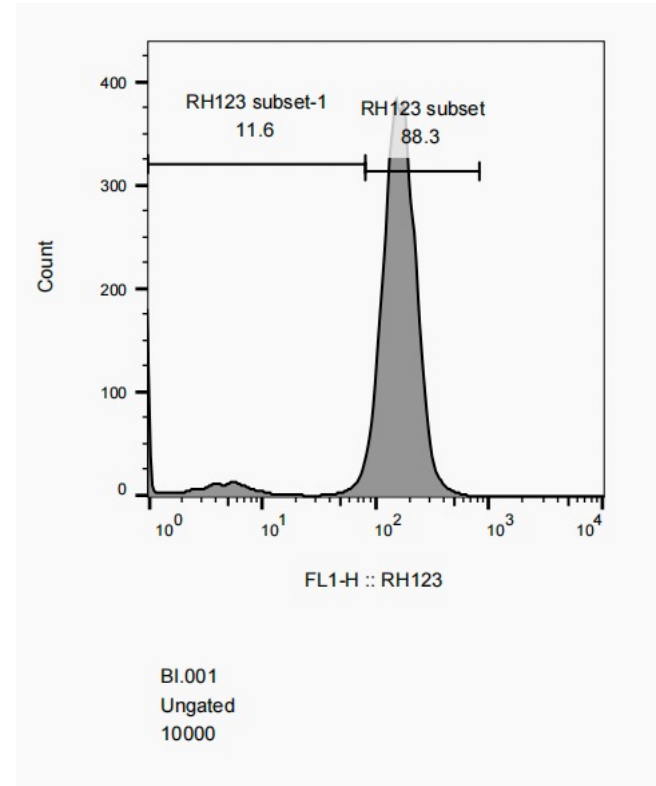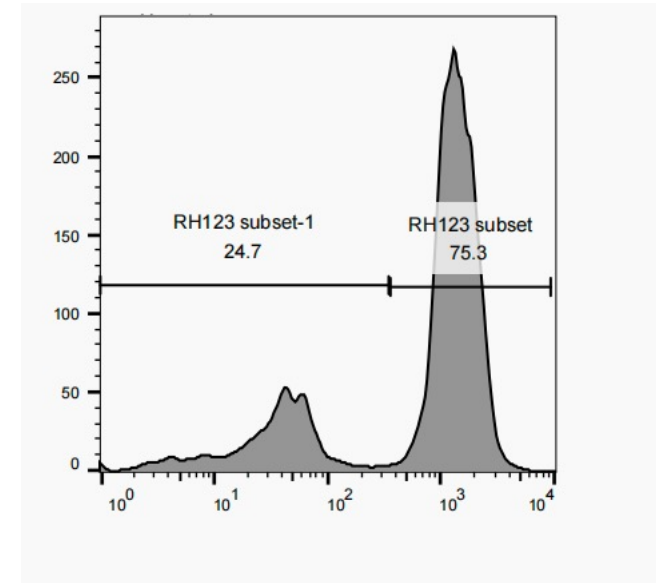

SGC-7901 BI

**Figure 3E** The changes of mitochondrial membrane potential (MMP) in SGC-7901 cells were detected by RH-123 staining after treatment with BI, 5-FU alone or their combination for 12 h

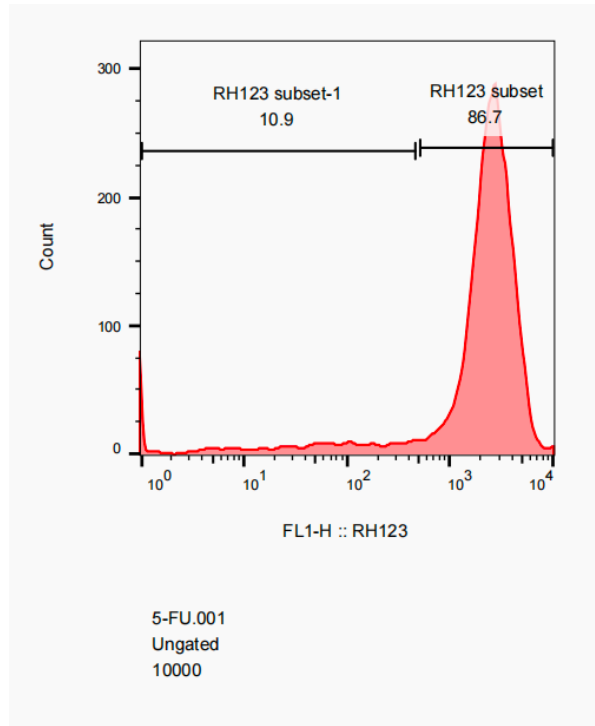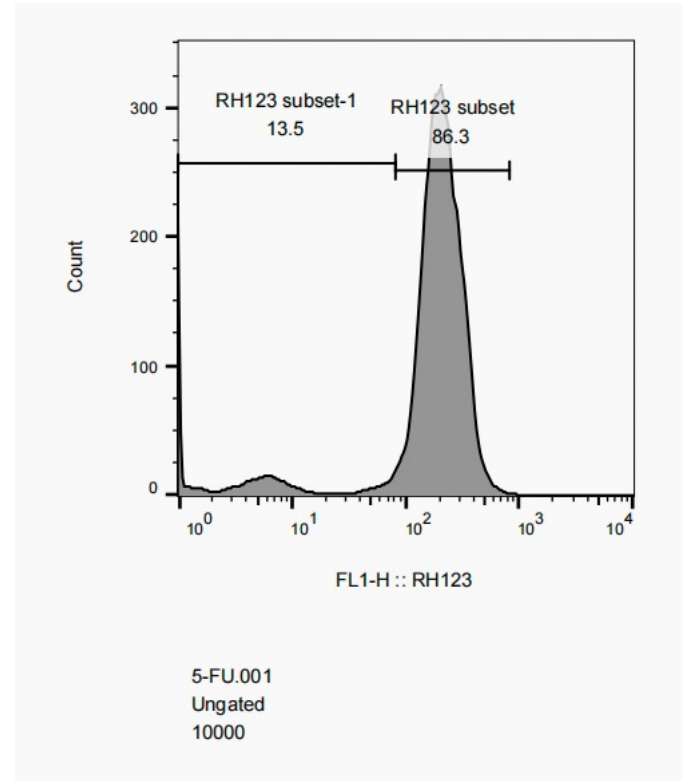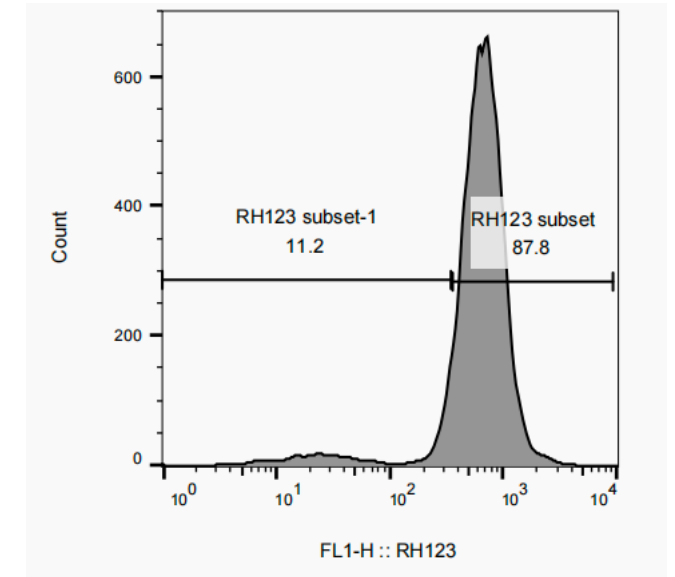

SGC-7901 5-FU

**Figure 3E** The changes of mitochondrial membrane potential (MMP) in SGC-7901 cells were detected by RH-123 staining after treatment with BI, 5-FU alone or their combination for 12 h

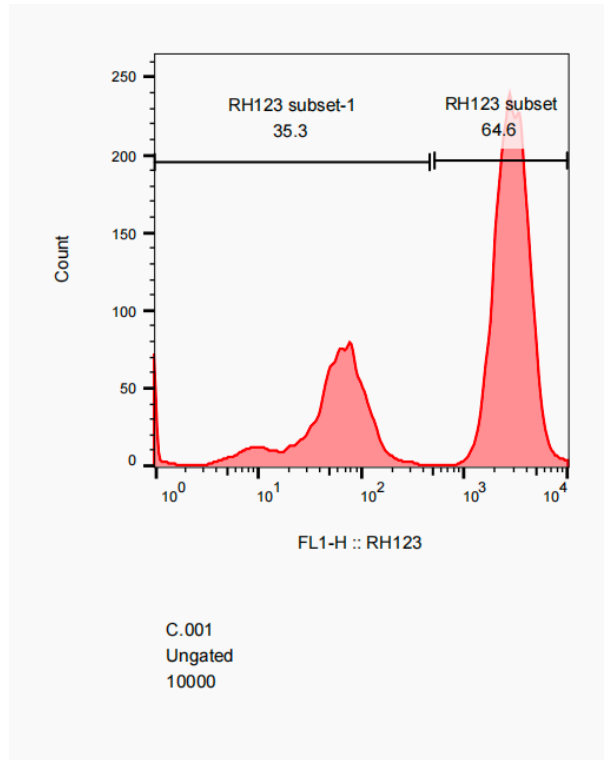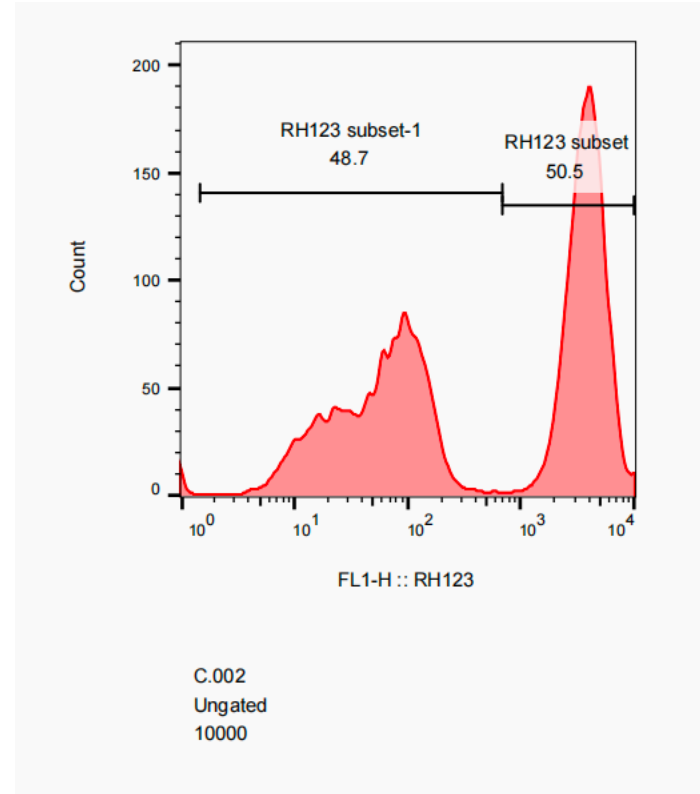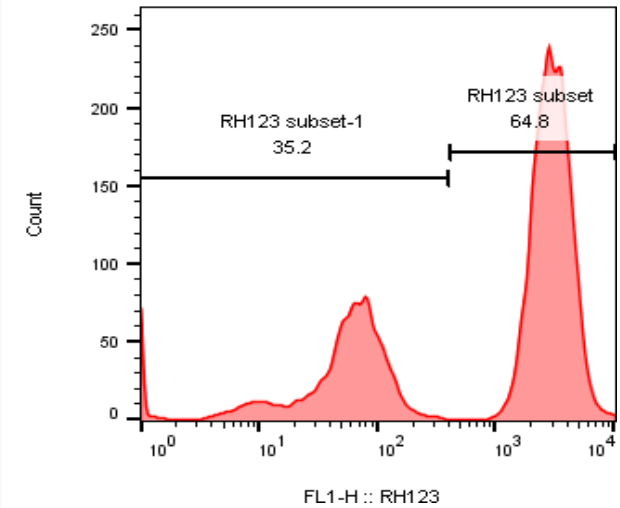

SGC-7901 BI+5-FU

**Figure 3E** The changes of mitochondrial membrane potential (MMP) in SGC-7901 cells were detected by RH-123 staining after treatment with BI, 5-FU alone or their combination for 12 h

| ctrl | BI   | 5-FU | BI+5-FU |
|------|------|------|---------|
|      |      |      |         |
| 82.5 | 75.8 | 87.8 | 64.6    |
| 87.0 | 88.3 | 86.7 | 64.8    |
| 86.1 | 75.3 | 86.8 | 50.5    |

**Figure 3F** The changes of mitochondrial membrane potential (MMP) in SGC-7901 cells were detected by RH-123 staining after treatment with BI, 5-FU alone or their combination for 24 h

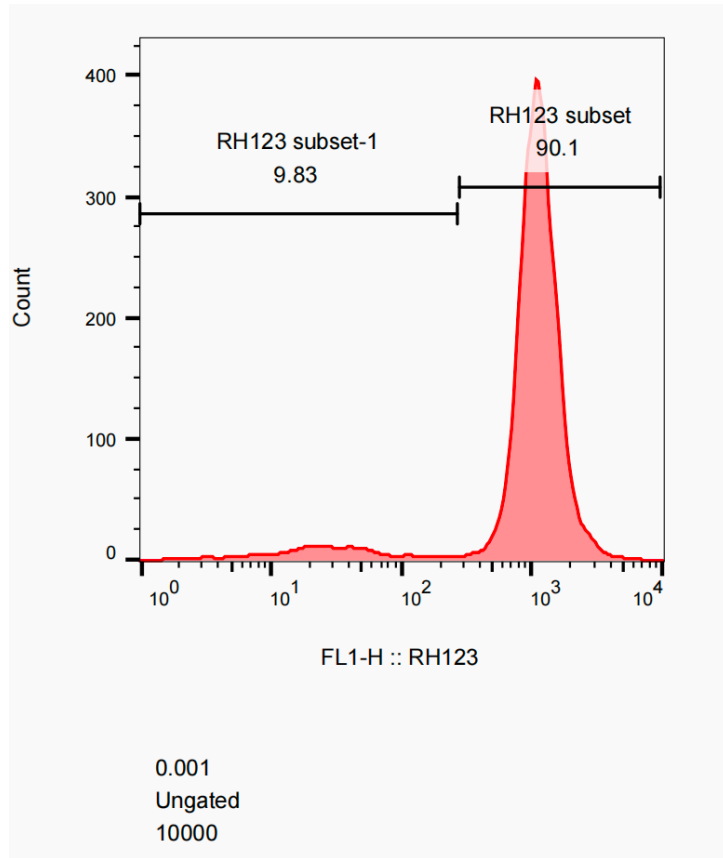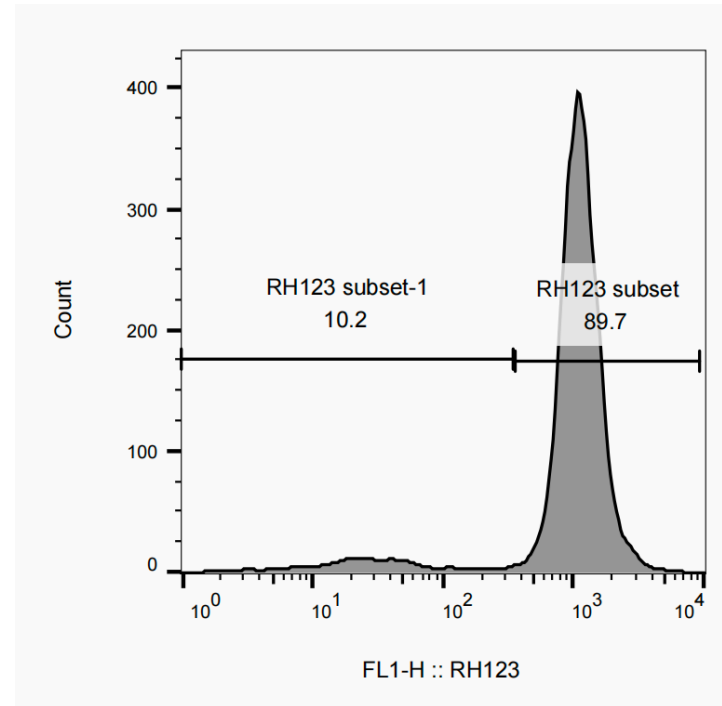

SGC-7901 Ctrl

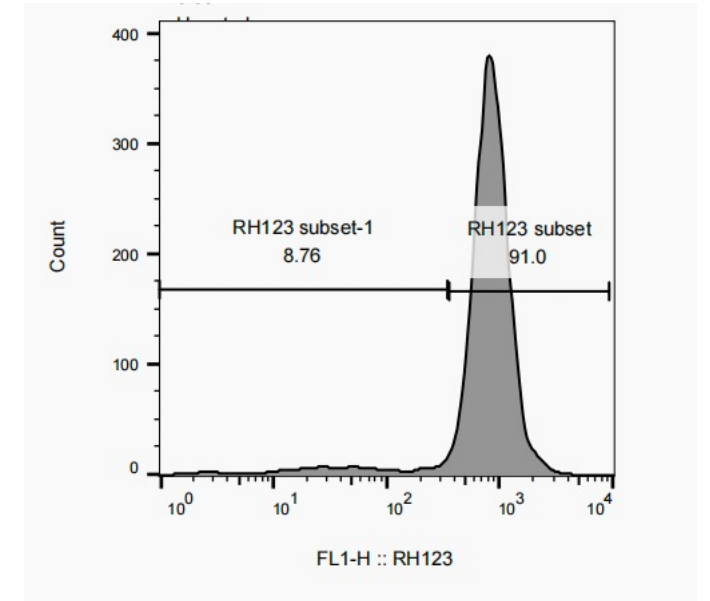

**Figure 3F** The changes of mitochondrial membrane potential (MMP) in SGC-7901 cells were detected by RH-123 staining after treatment with BI, 5-FU alone or their combination for 24 h

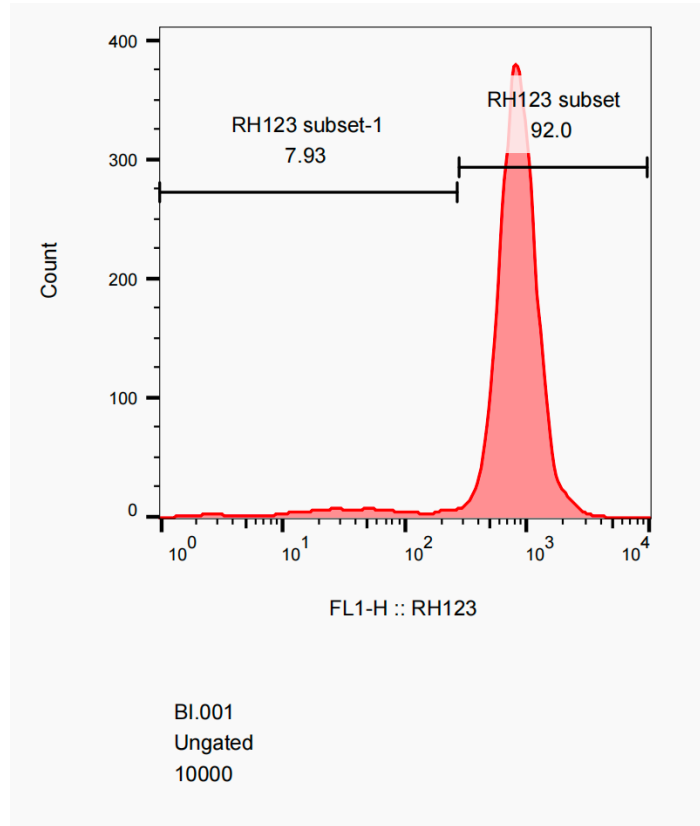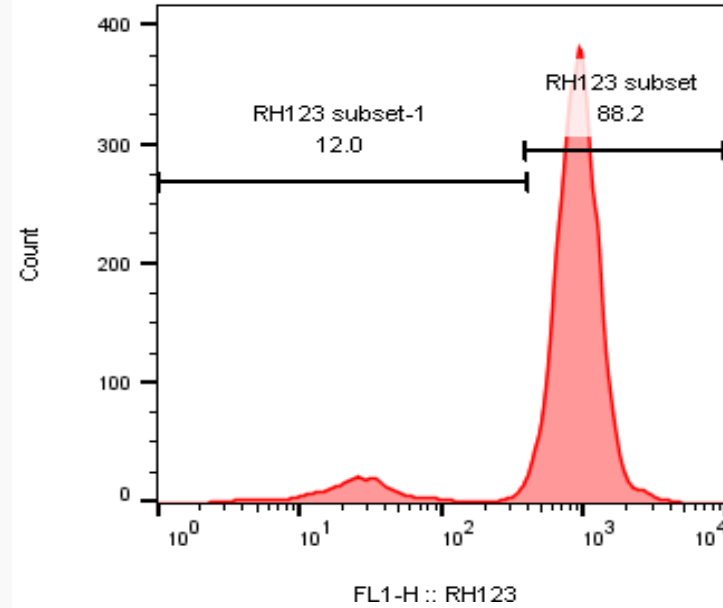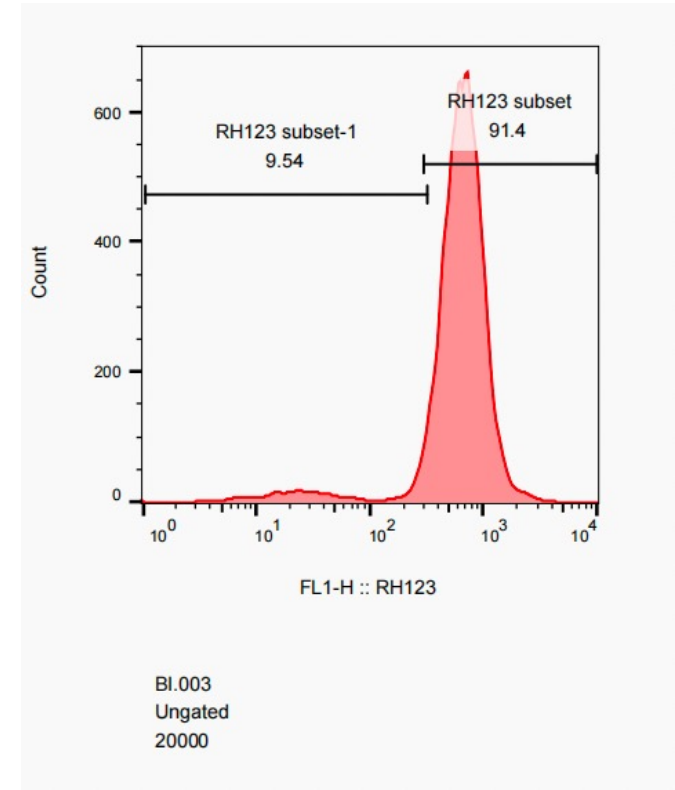

SGC-7901 BI

**Figure 3F** The changes of mitochondrial membrane potential (MMP) in SGC-7901 cells were detected by RH-123 staining after treatment with BI, 5-FU alone or their combination for 24 h

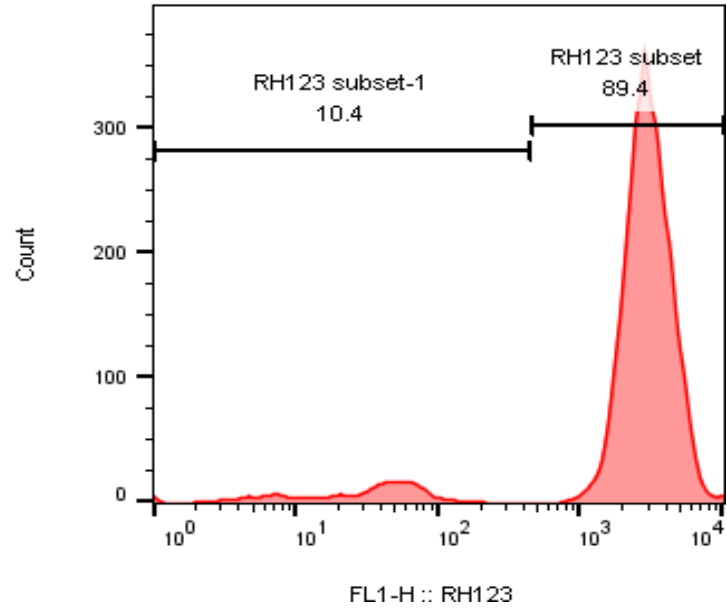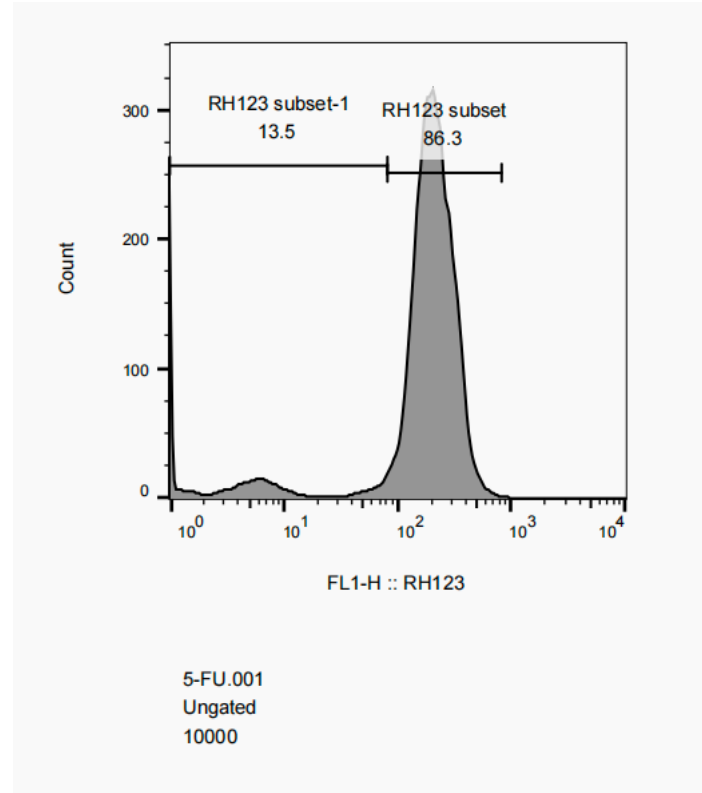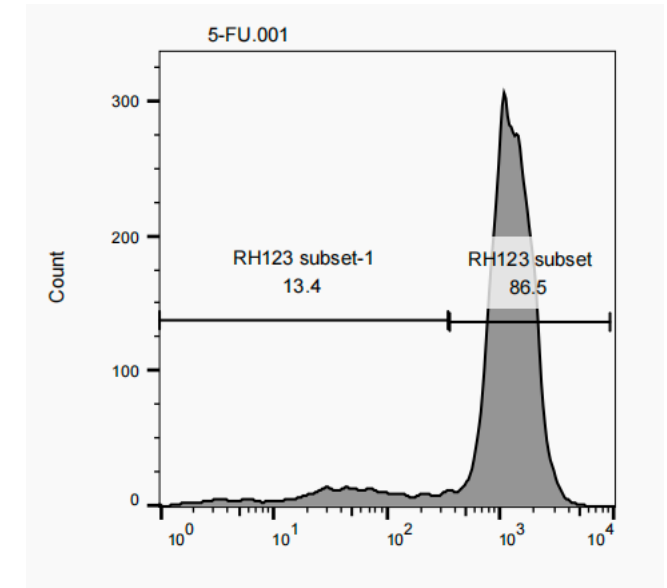

SGC-7901 5-FU

**Figure 3F** The changes of mitochondrial membrane potential (MMP) in SGC-7901 cells were detected by RH-123 staining after treatment with BI, 5-FU alone or their combination for 24 h

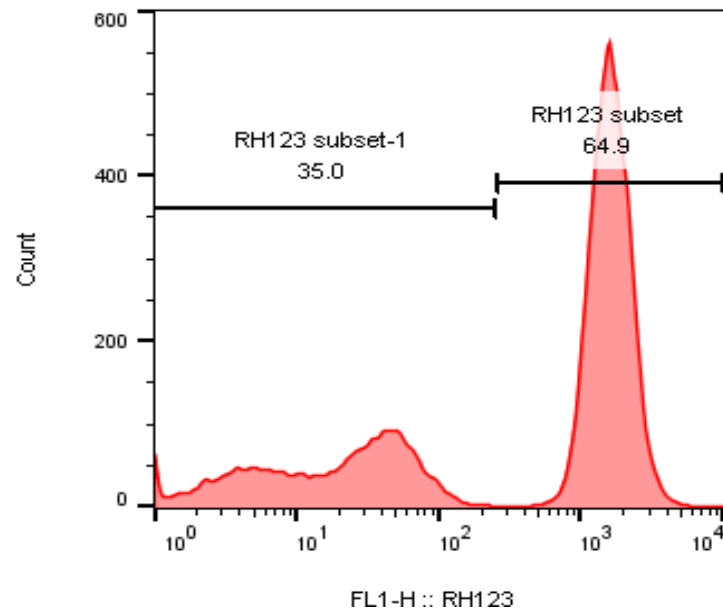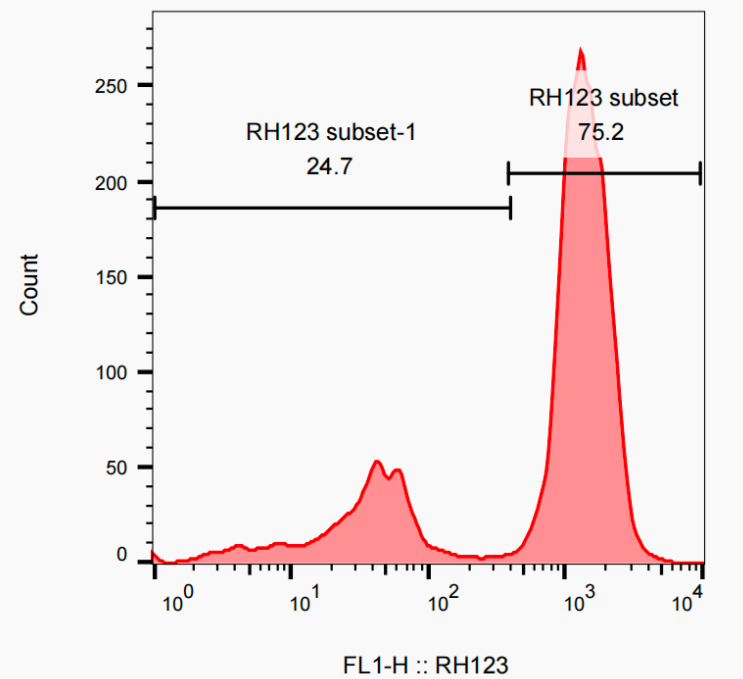

C.002  
Ungated  
10000

SGC-7901 BI+5-FU

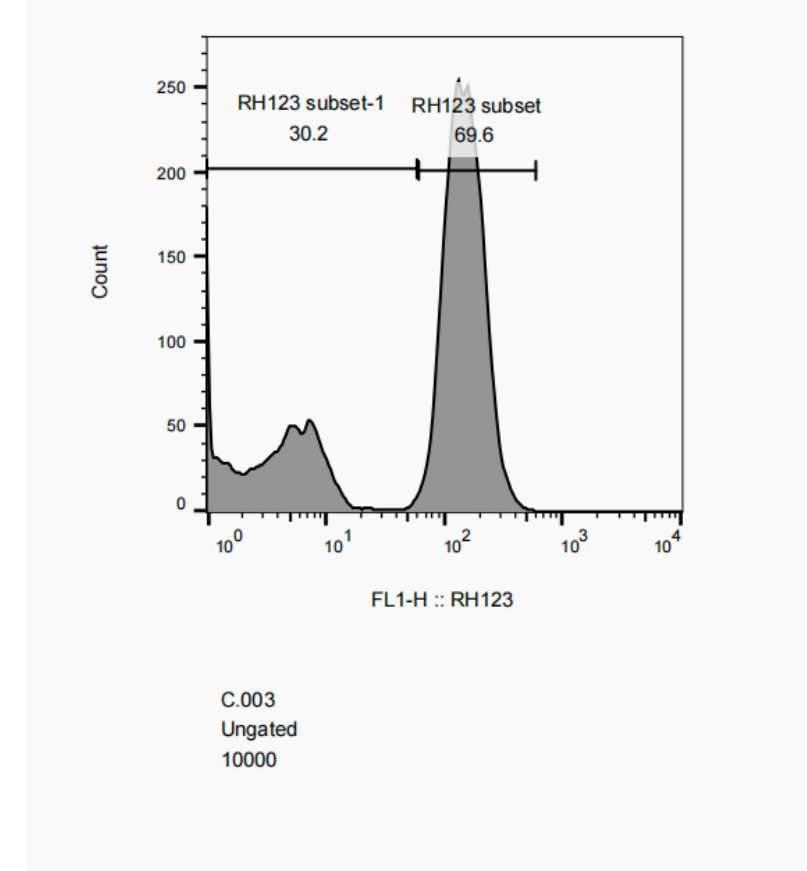



**Figure 3F** The changes of mitochondrial membrane potential (MMP) in SGC-7901 cells were detected by RH-123 staining after treatment with BI, 5-FU alone or their combination for 24 h

| ctrl | BI   | 5-FU | BI+5-FU |
|------|------|------|---------|
| 89.7 | 91.4 | 86.5 | 75.2    |
| 90.1 | 92.0 | 89.4 | 69.6    |
| 91.0 | 88.2 | 86.3 | 64.9    |
